# Supplementary material for: Influence of the Pd : Bi ratio on Pd–Bi/Al2O3 catalysts: structure, surface and activity in glucose oxidation
Source: Royal Society of Chemistry journal article supplement (doi:10.1039/d1cp01305j), 2021-01-01
Supplement: d1cp01305j1.pdf [file d1cp01305j1.pdf]

# Influence of Pd:Bi ratio on Pd-Bi/Al<sub>2</sub>O<sub>3</sub> catalysts: structure, surface and activity in glucose oxidation

M.P. Sandu<sup>a,b</sup>, M.A. Kovtunov<sup>a</sup>, V.S. Baturin<sup>c</sup>, A.R.Oganov<sup>c</sup>, I.A.Kurzina<sup>†a</sup>

## SUPPORTING INFORMATION

<sup>a</sup> Department of Physical and Colloid Chemistry, National Research Tomsk State University; 36 Lenin Ave., 634050 Tomsk, Russia

<sup>b</sup> Department of Chemistry, Siberian State Medical University; 2 Moskovsky tract, 634050 Tomsk, Russia

<sup>c</sup> Skolkovo Institute of Science and Technology, Bolshoy Boulevard, 30, building 1, 121205, Moscow, Russia

<sup>†</sup> correspondence to kurzina99@mail.ru

### Contents

|                                                                                            |   |
|--------------------------------------------------------------------------------------------|---|
| Figure S1 TEM-image for Bi/Al <sub>2</sub> O <sub>3</sub> sample .....                     | 2 |
| Figure S2 Element mapping for Bi/Al <sub>2</sub> O <sub>3</sub> sample.....                | 2 |
| Figure S3 EDX-profile for Pd1:Bi2/Al <sub>2</sub> O <sub>3</sub> .....                     | 3 |
| Table S1 Texture characteristics of obtained Pd <sub>x</sub> :Bi <sub>y</sub> samples..... | 3 |
| Table S2 Element content for Pd1:Bi2/Al <sub>2</sub> O <sub>3</sub> measured by EDX.....   | 3 |
| Table S3 Bader charges of Pd <sub>15</sub> Bi <sub>9</sub> cluster .....                   | 3 |
| Table S4 Structures of stable clusters Pd <sub>m</sub> Bi <sub>n</sub> .....               | 5 |

Figure S1 TEM-image for Bi/Al<sub>2</sub>O<sub>3</sub> sample

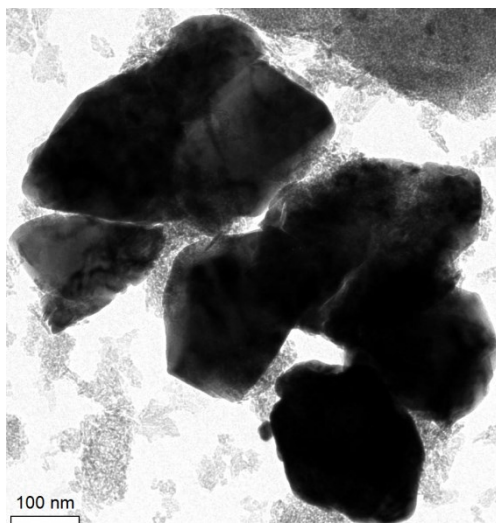

Figure S2 Element mapping for Bi/Al<sub>2</sub>O<sub>3</sub> sample

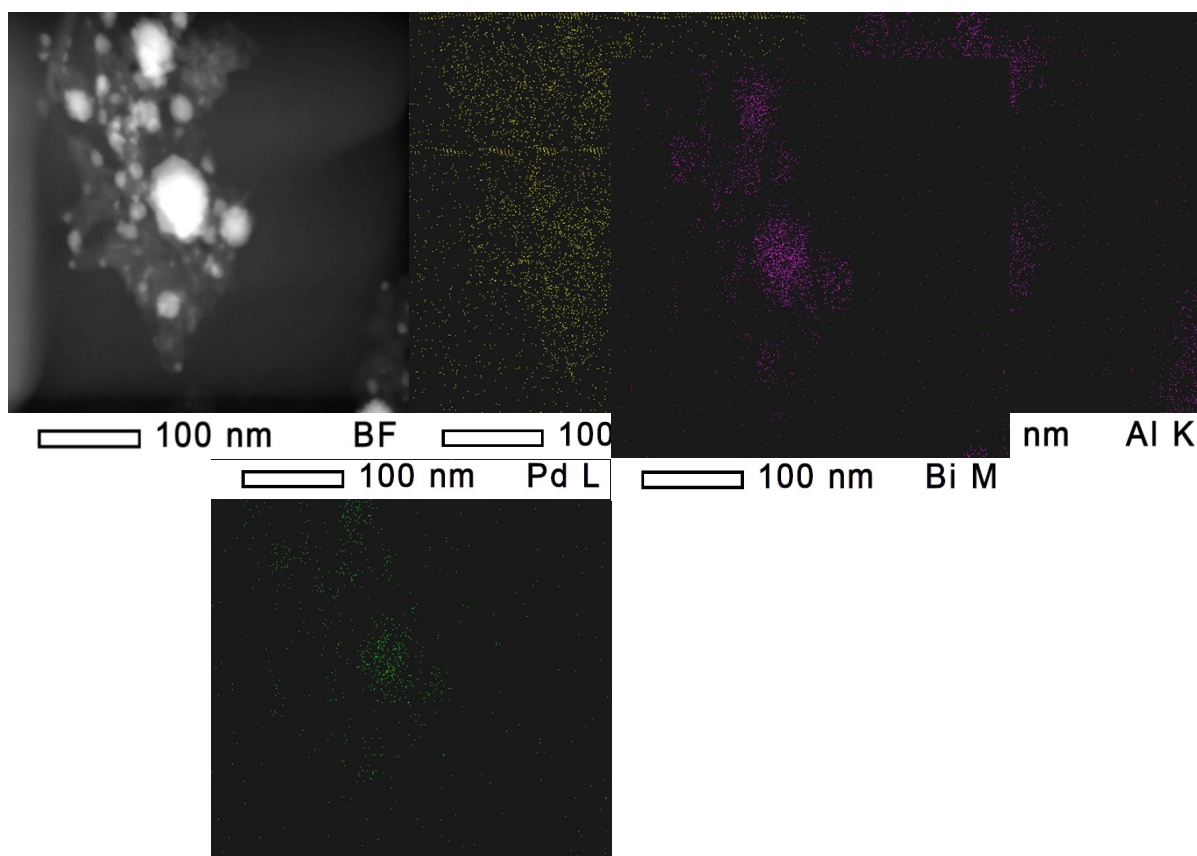

Figure S3 EDX-profile for Pd1:Bi2/Al<sub>2</sub>O<sub>3</sub>

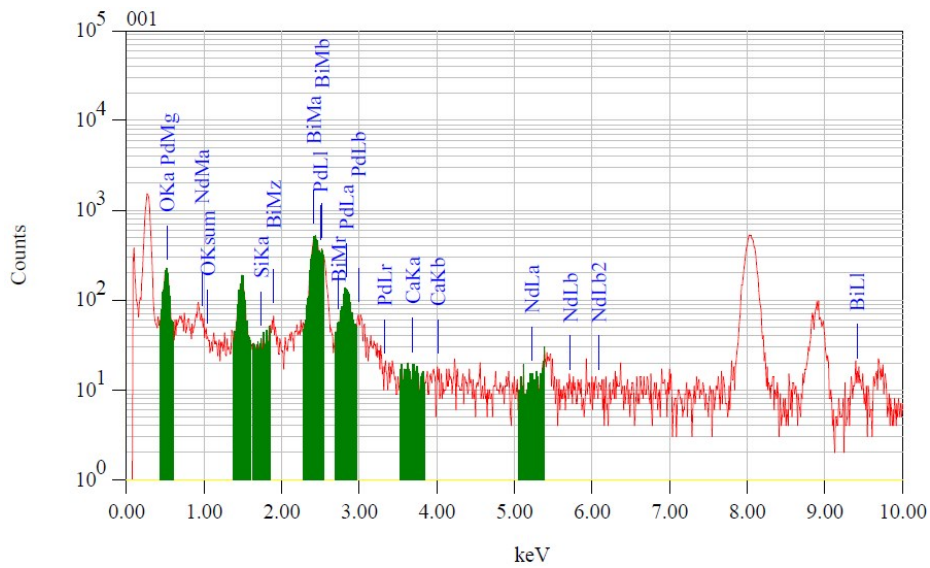

Table S1 Texture characteristics of obtained Pd<sub>x</sub>:Bi<sub>y</sub> samples

| Sample  | Specific surface area, m <sup>2</sup> /g | Total pore volume, cm <sup>3</sup> /g | Average pore size, nm |
|---------|------------------------------------------|---------------------------------------|-----------------------|
| Pd3:Bi1 | 135                                      | 0.263                                 | 7.77                  |
| Pd5:Bi2 | 137                                      | 0.264                                 | 7.73                  |
| Pd2:Bi1 | 131                                      | 0.263                                 | 7.80                  |
| Pd1:Bi1 | 133                                      | 0.271                                 | 8.13                  |
| Pd1:Bi2 | 129                                      | 0.248                                 | 7.69                  |

Table S2 Element content for Pd1:Bi2/Al<sub>2</sub>O<sub>3</sub> measured by EDX

| Element | Content, at.% |
|---------|---------------|
| O       | 71.65         |
| Al      | 18.66         |
| Pd      | 1.69          |
| Bi      | 5.64          |

Table S3 Bader charges of Pd<sub>15</sub>Bi<sub>9</sub> cluster

|    | X           | Y           | Z           | Q <sub>AIM</sub> ( q <sub>e</sub>  ) |
|----|-------------|-------------|-------------|--------------------------------------|
| Pd | -1.30984000 | -0.00155000 | -0.00132000 | -0.07533600                          |
| Pd | -0.01636000 | -1.79670000 | -1.69188000 | -0.26664600                          |
| Pd | -2.94436000 | -1.59316000 | -1.59223000 | -0.25608800                          |
| Pd | -2.94286000 | 1.59444000  | -1.59061000 | -0.25601500                          |
| Pd | -0.01570000 | -1.79398000 | 1.69014000  | -0.26691500                          |

|    |             |             |             |             |
|----|-------------|-------------|-------------|-------------|
| Pd | -2.94300000 | -1.59263000 | 1.59289000  | -0.25535300 |
| Pd | -2.94144000 | 1.59394000  | 1.59118000  | -0.25531900 |
| Pd | 1.42725000  | -3.47389000 | 0.00021000  | -0.25000100 |
| Pd | -0.01438000 | 1.79271000  | 1.68709000  | -0.26631700 |
| Pd | 1.49684000  | -0.00001000 | 3.22418000  | -0.25584600 |
| Pd | 1.43017000  | 3.47407000  | 0.00012000  | -0.25102500 |
| Pd | -0.01499000 | 1.79538000  | -1.68894000 | -0.26620800 |
| Pd | 1.49569000  | 0.00003000  | -3.22295000 | -0.25698700 |
| Pd | 1.38023000  | -0.00223000 | -0.00241000 | -0.16986700 |
| Pd | 4.09881000  | -0.00018000 | 0.00034000  | -0.33006100 |
| Bi | -1.51585000 | -3.33539000 | 0.00030000  | 0.41688100  |
| Bi | -4.46823000 | 0.00051000  | 0.00088000  | 0.34201300  |
| Bi | -1.40137000 | 0.00077000  | 3.24330000  | 0.42616600  |
| Bi | -1.40207000 | 0.00073000  | -3.24206000 | 0.42656600  |
| Bi | -1.51398000 | 3.33788000  | 0.00013000  | 0.41744500  |
| Bi | 2.82714000  | 1.86641000  | -1.73582000 | 0.41234000  |
| Bi | 2.82633000  | -1.86771000 | -1.73616000 | 0.41203200  |
| Bi | 2.82702000  | 1.86586000  | 1.73585000  | 0.41241200  |
| Bi | 2.82631000  | -1.86699000 | 1.73591000  | 0.41212800  |

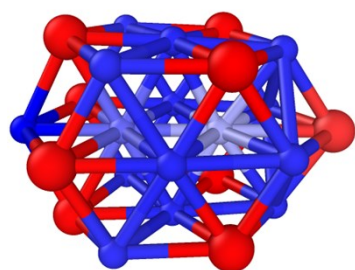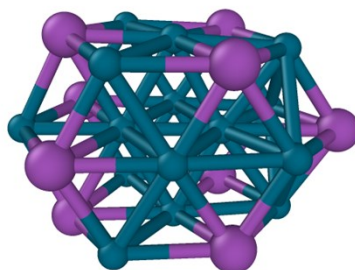

Bader charge  
-0.330061 0.426566

Table S4 Structures of stable clusters Pd<sub>m</sub>Bi<sub>n</sub>

|                        |             |            |            |                        |             |            |            |
|------------------------|-------------|------------|------------|------------------------|-------------|------------|------------|
| <b>Bi<sub>2</sub></b>  |             |            |            | Bi                     | 7.84768727  | 6.92724755 | 9.25414167 |
| Bi                     | 3.08132728  | 4.39000000 | 5.62877600 | <b>Bi<sub>11</sub></b> |             |            |            |
| Bi                     | 5.69867272  | 4.39000000 | 5.62877600 | Bi                     | 11.16951288 | 7.82625447 | 5.59301283 |
| <b>Bi<sub>3</sub></b>  |             |            |            | Bi                     | 8.37163888  | 8.07475851 | 4.63187787 |
| Bi                     | 7.47955103  | 4.87876660 | 4.48000000 | Bi                     | 7.33377568  | 9.02027634 | 7.19239133 |
| Bi                     | 4.47999997  | 4.87876660 | 4.48000000 | Bi                     | 4.50644683  | 8.13607976 | 6.79688148 |
| Bi                     | 5.97977550  | 7.27138845 | 4.48000000 | Bi                     | 5.04900150  | 5.74488348 | 8.49110383 |
| <b>Bi<sub>4</sub></b>  |             |            |            | Bi                     | 11.03542215 | 7.40767374 | 8.51791783 |
| Bi                     | 6.59969280  | 6.66367451 | 6.94019406 | Bi                     | 11.44638200 | 5.08147001 | 6.70482595 |
| Bi                     | 4.49463320  | 4.60213394 | 6.66367451 | Bi                     | 4.82894615  | 5.45940046 | 5.55648028 |
| Bi                     | 6.59969280  | 4.87865349 | 4.60213394 | Bi                     | 7.65979486  | 5.22236256 | 4.66966923 |
| Bi                     | 4.49463320  | 6.94019406 | 4.87865349 | Bi                     | 8.00915713  | 6.77763446 | 8.98385334 |
| <b>Bi<sub>5</sub></b>  |             |            |            | Bi                     | 8.58646243  | 4.40905122 | 7.30772807 |
| Bi                     | 5.00449317  | 6.42018515 | 4.48027411 | <b>Bi<sub>12</sub></b> |             |            |            |
| Bi                     | 6.74915039  | 4.48225922 | 5.96047440 | Bi                     | 13.47866100 | 6.76085884 | 6.77367539 |
| Bi                     | 4.98111279  | 6.41745087 | 7.41430530 | Bi                     | 11.25959053 | 6.67218508 | 4.76883727 |
| Bi                     | 6.75048827  | 8.35479912 | 5.96254680 | Bi                     | 11.50957953 | 8.98233109 | 6.64526241 |
| Bi                     | 8.98752337  | 6.41782314 | 5.95813999 | Bi                     | 11.41438793 | 4.62380074 | 6.95354115 |
| <b>Bi<sub>6</sub></b>  |             |            |            | Bi                     | 7.69181265  | 4.60771795 | 6.86113142 |
| Bi                     | 4.64468607  | 4.36371561 | 6.55937218 | Bi                     | 4.86079863  | 5.25442886 | 7.55715333 |
| Bi                     | 4.49700472  | 6.23686836 | 4.24051782 | Bi                     | 9.51045131  | 5.50829931 | 9.02124470 |
| Bi                     | 4.58131230  | 7.32297478 | 7.01388109 | Bi                     | 4.88704818  | 8.21332002 | 7.75115491 |
| Bi                     | 7.67225715  | 4.42476641 | 6.49829039 | Bi                     | 9.65467574  | 8.43940739 | 8.87214114 |
| Bi                     | 7.53216263  | 6.27591639 | 4.15929568 | Bi                     | 4.78217194  | 6.89307081 | 5.08710551 |
| Bi                     | 7.60626513  | 7.38683444 | 6.92469483 | Bi                     | 7.58418430  | 9.10008493 | 6.85512404 |
| <b>Bi<sub>7</sub></b>  |             |            |            | Bi                     | 7.87710968  | 6.86019530 | 4.95910305 |
| Bi                     | 7.93912110  | 4.37376050 | 5.74624849 | <b>Bi<sub>13</sub></b> |             |            |            |
| Bi                     | 5.07858239  | 4.98118076 | 5.14553142 | Bi                     | 12.03296411 | 8.33333545 | 8.21074766 |
| Bi                     | 4.95184099  | 6.69515384 | 7.52698001 | Bi                     | 13.01742787 | 5.89385470 | 6.91192128 |
| Bi                     | 8.29412988  | 6.59716923 | 7.71824350 | Bi                     | 9.28675978  | 7.82388975 | 4.54870084 |
| Bi                     | 4.99798162  | 7.90339354 | 4.84001762 | Bi                     | 12.18581378 | 8.21011163 | 5.25555522 |
| Bi                     | 9.51489119  | 6.72537795 | 4.93861737 | Bi                     | 8.79777632  | 8.94371561 | 7.21093648 |
| Bi                     | 7.66140548  | 8.83745551 | 5.80330809 | Bi                     | 6.60856391  | 4.75651285 | 5.38093618 |
| <b>Bi<sub>8</sub></b>  |             |            |            | Bi                     | 6.67985554  | 4.88805948 | 8.31780628 |
| Bi                     | 4.59287917  | 6.69326307 | 7.55490212 | Bi                     | 4.43905050  | 6.85923261 | 7.87682640 |
| Bi                     | 4.71908131  | 6.66511366 | 4.51406678 | Bi                     | 5.08439263  | 7.33848772 | 4.97147875 |
| Bi                     | 7.09243695  | 8.47318329 | 4.58852200 | Bi                     | 5.79970616  | 9.30949765 | 7.02442311 |
| Bi                     | 6.95100182  | 8.52398317 | 7.55179576 | Bi                     | 9.52589248  | 4.91682213 | 4.74675595 |
| Bi                     | 8.49464400  | 4.32793977 | 6.18577643 | Bi                     | 10.41955669 | 4.49074052 | 7.49224455 |
| Bi                     | 5.53757712  | 4.33216873 | 6.09231759 | Bi                     | 9.03543246  | 6.63160649 | 8.98245242 |
| Bi                     | 9.43167632  | 6.61708945 | 4.60251889 | <b>Bi<sub>14</sub></b> |             |            |            |
| Bi                     | 9.33919734  | 6.73826286 | 7.63731206 | Bi                     | 8.00870496  | 8.32434283 | 4.86368223 |
| <b>Bi<sub>9</sub></b>  |             |            |            | Bi                     | 7.06623870  | 4.32190918 | 6.84524099 |
| Bi                     | 4.65713940  | 5.51516087 | 7.53572912 | Bi                     | 5.11714977  | 8.47919473 | 5.65584726 |
| Bi                     | 5.23030611  | 8.36444539 | 6.98896268 | Bi                     | 8.05314799  | 5.45416847 | 4.30145433 |
| Bi                     | 5.13657183  | 6.43571589 | 4.74692206 | Bi                     | 4.71194258  | 6.05496584 | 7.31692579 |
| Bi                     | 8.06384135  | 5.38320718 | 4.56954539 | Bi                     | 8.77421354  | 5.70817883 | 8.77819014 |
| Bi                     | 7.41488052  | 4.34044124 | 7.30881883 | Bi                     | 11.71802308 | 8.09889285 | 4.84406948 |
| Bi                     | 9.28125809  | 8.04815253 | 4.97262900 | Bi                     | 11.01818875 | 5.21994863 | 4.76138220 |
| Bi                     | 10.76910151 | 5.87834496 | 6.36166323 | Bi                     | 14.31278544 | 7.61622101 | 6.25453907 |
| Bi                     | 8.11302625  | 8.79352109 | 7.57440642 | Bi                     | 11.14757518 | 4.41596219 | 7.59611600 |
| Bi                     | 9.06091934  | 6.24843947 | 8.80092276 | Bi                     | 12.04000832 | 9.00830979 | 7.66722062 |
| <b>Bi<sub>10</sub></b> |             |            |            | Bi                     | 13.05801478 | 6.39994122 | 8.65552662 |
| Bi                     | 10.63776511 | 6.87477723 | 8.13922198 | Bi                     | 5.81757642  | 8.51320368 | 8.56483606 |
| Bi                     | 6.95951636  | 9.18602314 | 7.64902459 | Bi                     | 8.72799352  | 8.45524573 | 7.73588538 |
| Bi                     | 10.54037137 | 8.28506781 | 5.53431005 |                        |             |            |            |
| Bi                     | 10.53625854 | 5.38156874 | 5.59324111 |                        |             |            |            |
| Bi                     | 6.85578329  | 4.60826281 | 7.79265159 |                        |             |            |            |
| Bi                     | 7.47546043  | 8.27188163 | 4.90309006 |                        |             |            |            |
| Bi                     | 7.46987873  | 5.29967993 | 5.00189757 |                        |             |            |            |
| Bi                     | 4.47949355  | 5.45895696 | 6.28781696 |                        |             |            |            |
| Bi                     | 4.50667536  | 8.31311418 | 6.28323270 |                        |             |            |            |

| <b>Bi<sub>15</sub></b> |             |            |            |
|------------------------|-------------|------------|------------|
| Bi                     | 7.29671691  | 5.42686416 | 8.84293789 |
| Bi                     | 7.01146315  | 4.36549709 | 6.10983002 |
| Bi                     | 11.06098874 | 4.49997592 | 6.23044550 |
| Bi                     | 4.55330046  | 5.19466133 | 7.53327792 |
| Bi                     | 10.41964165 | 6.63068670 | 4.34335981 |
| Bi                     | 13.91194679 | 5.43543668 | 6.01775481 |
| Bi                     | 7.39840477  | 6.54708773 | 4.20110071 |
| Bi                     | 6.75984517  | 8.92629319 | 5.78131972 |
| Bi                     | 4.27198636  | 8.08778449 | 7.09664628 |
| Bi                     | 7.22823742  | 8.38510053 | 8.63793165 |
| Bi                     | 10.85123896 | 9.04970765 | 5.94237532 |
| Bi                     | 13.70587649 | 8.37956157 | 6.41629590 |
| Bi                     | 13.73507087 | 6.56147006 | 8.77851841 |
| Bi                     | 10.32754278 | 8.46604514 | 8.75474637 |
| Bi                     | 10.84256055 | 5.61391568 | 8.97061588 |

| <b>PdBi</b> |            |            |            |
|-------------|------------|------------|------------|
| Pd          | 4.48000044 | 4.48000000 | 4.48000000 |
| Bi          | 6.89465856 | 4.48000000 | 4.48000000 |

| <b>PdBi<sub>2</sub></b> |            |            |            |
|-------------------------|------------|------------|------------|
| Pd                      | 5.82048451 | 7.07046179 | 4.48000000 |
| Bi                      | 4.46530122 | 4.85843216 | 4.48000000 |
| Bi                      | 7.18331927 | 4.86257405 | 4.48000000 |

| <b>PdBi<sub>3</sub></b> |            |            |            |
|-------------------------|------------|------------|------------|
| Pd                      | 6.15987504 | 5.31193551 | 3.99255779 |
| Bi                      | 6.19741784 | 7.47241373 | 5.61100902 |
| Bi                      | 4.57378402 | 5.12577808 | 6.13552271 |
| Bi                      | 7.68716541 | 5.05951068 | 6.15761649 |

| <b>PdBi<sub>4</sub></b> |            |            |            |
|-------------------------|------------|------------|------------|
| Pd                      | 4.57836970 | 6.24307621 | 5.82938623 |
| Bi                      | 6.35832725 | 4.52656563 | 6.55424869 |
| Bi                      | 6.37208998 | 7.78440334 | 6.87507783 |
| Bi                      | 8.64529377 | 6.23220922 | 5.83950189 |
| Bi                      | 6.38314931 | 6.44074311 | 3.96977949 |

| <b>PdBi<sub>5</sub></b> |            |            |            |
|-------------------------|------------|------------|------------|
| Pd                      | 6.38066238 | 6.53456073 | 4.64922950 |
| Bi                      | 6.70775480 | 8.48464031 | 6.44299287 |
| Bi                      | 8.36929680 | 6.46695891 | 7.91281643 |
| Bi                      | 8.93955251 | 6.53742412 | 5.02894922 |
| Bi                      | 6.70817008 | 4.51962558 | 6.36722381 |
| Bi                      | 4.42306360 | 6.50290736 | 6.54728616 |

| <b>PdBi<sub>6</sub></b> |            |            |            |
|-------------------------|------------|------------|------------|
| Pd                      | 7.01625723 | 6.47879121 | 6.67288722 |
| Bi                      | 7.04151540 | 4.30270042 | 5.01537942 |
| Bi                      | 6.99530698 | 7.26320344 | 4.02356697 |
| Bi                      | 4.53257904 | 5.45065535 | 6.32477014 |
| Bi                      | 9.50211042 | 5.47404928 | 6.36649382 |
| Bi                      | 5.04945947 | 8.27744346 | 6.04973593 |
| Bi                      | 8.97585640 | 8.29195082 | 5.98826544 |

| <b>PdBi<sub>7</sub></b> |            |            |            |
|-------------------------|------------|------------|------------|
| Pd                      | 7.00690414 | 6.84821243 | 6.54205879 |
| Bi                      | 5.21246846 | 6.86123925 | 4.19594099 |
| Bi                      | 8.00543829 | 4.44949513 | 6.01335585 |
| Bi                      | 4.84406974 | 8.40593202 | 6.69446171 |
| Bi                      | 4.83863295 | 5.30144909 | 6.68142523 |
| Bi                      | 8.49682341 | 6.84434553 | 4.11244854 |
| Bi                      | 9.66410830 | 6.88402933 | 6.95967441 |
| Bi                      | 7.98095871 | 9.25504750 | 5.99153007 |

| <b>PdBi<sub>8</sub></b> |            |            |            |
|-------------------------|------------|------------|------------|
| Pd                      | 6.93768434 | 6.92039191 | 5.49585712 |
| Bi                      | 9.38748506 | 6.16831260 | 6.65770191 |
| Bi                      | 6.18882273 | 4.49586725 | 6.67799930 |
| Bi                      | 4.50709944 | 7.66701806 | 6.66414446 |
| Bi                      | 7.68152349 | 9.34062600 | 6.67939259 |
| Bi                      | 9.23819833 | 8.14152600 | 4.49324824 |
| Bi                      | 8.14791964 | 4.62146985 | 4.49186610 |
| Bi                      | 4.62773588 | 5.69117496 | 4.49845356 |
| Bi                      | 5.71758447 | 9.23588105 | 4.49965736 |

| <b>PdBi<sub>9</sub></b> |             |            |            |
|-------------------------|-------------|------------|------------|
| Pd                      | 7.90903536  | 6.91624267 | 6.40396445 |
| Bi                      | 4.10549105  | 7.21533431 | 6.39368925 |
| Bi                      | 7.26810855  | 4.39483645 | 7.33737045 |
| Bi                      | 5.98178669  | 5.44119614 | 4.87239219 |
| Bi                      | 6.16875586  | 6.99026115 | 8.61986255 |
| Bi                      | 7.45754661  | 9.46704393 | 7.41496949 |
| Bi                      | 10.23672887 | 5.34742264 | 6.78637728 |
| Bi                      | 10.34837419 | 8.28988753 | 7.27439133 |
| Bi                      | 9.97219415  | 7.24488302 | 4.54974829 |
| Bi                      | 6.28477853  | 8.54800216 | 4.80900051 |

| <b>PdBi<sub>10</sub></b> |             |            |            |
|--------------------------|-------------|------------|------------|
| Pd                       | 8.40429830  | 6.77296626 | 6.82118084 |
| Bi                       | 7.00884849  | 4.61425445 | 8.10022695 |
| Bi                       | 10.41397118 | 5.20366908 | 5.69522907 |
| Bi                       | 7.00457663  | 5.14329121 | 5.05406926 |
| Bi                       | 4.44861410  | 5.24425913 | 6.75928297 |
| Bi                       | 7.96381825  | 6.99364846 | 9.55147873 |
| Bi                       | 10.86128313 | 6.89400604 | 8.09679045 |
| Bi                       | 4.38789811  | 8.16589080 | 6.56040023 |
| Bi                       | 6.97493575  | 8.16456530 | 4.85966892 |
| Bi                       | 6.92515389  | 9.08714027 | 7.77575664 |
| Bi                       | 10.42700268 | 8.10660850 | 5.43076745 |

| <b>PdBi<sub>11</sub></b> |             |            |            |
|--------------------------|-------------|------------|------------|
| Pd                       | 7.32994535  | 7.25970492 | 5.98601066 |
| Bi                       | 10.47484420 | 6.35349959 | 9.17177907 |
| Bi                       | 7.70136352  | 4.67338992 | 6.85359477 |
| Bi                       | 7.50314528  | 7.07225645 | 8.73495417 |
| Bi                       | 4.32768457  | 6.32067869 | 8.41624618 |
| Bi                       | 5.05691110  | 5.44814440 | 5.66213864 |
| Bi                       | 4.76596284  | 8.40946783 | 6.32592122 |
| Bi                       | 9.49082304  | 8.82964506 | 5.21937102 |
| Bi                       | 11.50281209 | 5.39741485 | 6.57501046 |
| Bi                       | 9.25895783  | 5.82433745 | 4.56722799 |
| Bi                       | 11.62997642 | 8.29390480 | 7.29863020 |
| Bi                       | 7.36720768  | 9.73767610 | 7.15780796 |

| <b>PdBi<sub>12</sub></b> |             |            |            |
|--------------------------|-------------|------------|------------|
| Pd                       | 9.54715329  | 6.80488922 | 6.19824036 |
| Bi                       | 11.90273757 | 5.34968804 | 5.52548179 |
| Bi                       | 11.48600278 | 8.36412153 | 5.03552208 |
| Bi                       | 9.54334717  | 4.12023056 | 6.92268854 |
| Bi                       | 7.67583617  | 5.31778187 | 4.82583986 |
| Bi                       | 10.62477299 | 8.72315510 | 7.91606286 |
| Bi                       | 9.29436084  | 6.21426843 | 9.00510330 |
| Bi                       | 7.66822394  | 8.42501211 | 4.95775616 |
| Bi                       | 5.35225469  | 5.06081786 | 6.65078564 |
| Bi                       | 6.13627968  | 9.13992431 | 7.42450233 |
| Bi                       | 4.72555498  | 7.65036158 | 5.26137136 |
| Bi                       | 6.30738031  | 6.63261511 | 8.98998141 |
| Bi                       | 13.22120760 | 7.35883027 | 7.28161836 |

**PdBi<sub>13</sub>**

|    |             |            |            |
|----|-------------|------------|------------|
| Pd | 7.22839762  | 6.76543489 | 6.64110966 |
| Bi | 6.98227110  | 9.12727030 | 8.00056455 |
| Bi | 13.26860683 | 7.12452664 | 7.93068478 |
| Bi | 10.78284440 | 8.87206003 | 8.03008066 |
| Bi | 8.80227595  | 6.86090314 | 8.97178360 |
| Bi | 10.67319250 | 8.62716142 | 5.12390968 |
| Bi | 7.63551377  | 9.10787617 | 5.10897753 |
| Bi | 4.52308288  | 7.38507712 | 6.89950947 |
| Bi | 9.10052128  | 4.60251217 | 6.96160846 |
| Bi | 5.66973244  | 4.92105381 | 8.04378073 |
| Bi | 5.58958378  | 5.19583575 | 5.12889152 |
| Bi | 12.95229032 | 6.27372559 | 5.11288801 |
| Bi | 12.14734211 | 4.49599473 | 7.29310215 |
| Bi | 8.90582127  | 6.24541290 | 4.49756298 |

**PdBi<sub>14</sub>**

|    |             |             |            |
|----|-------------|-------------|------------|
| Pd | 8.35766417  | 8.21344220  | 6.62334723 |
| Bi | 8.88278267  | 5.76526933  | 7.88914981 |
| Bi | 10.82112038 | 4.43181398  | 6.00891790 |
| Bi | 4.39730148  | 6.81388023  | 6.10003361 |
| Bi | 6.00076583  | 4.97226458  | 7.74572842 |
| Bi | 6.46295464  | 8.34451093  | 4.55597516 |
| Bi | 8.94775439  | 6.32513074  | 4.67090429 |
| Bi | 5.60093851  | 7.75644891  | 8.69675041 |
| Bi | 10.19127294 | 9.08422752  | 4.66158717 |
| Bi | 6.30877332  | 10.14619098 | 6.86862132 |
| Bi | 9.26043189  | 10.82915537 | 7.03536931 |
| Bi | 13.12622246 | 6.02162323  | 6.93883100 |
| Bi | 9.47257103  | 8.67331964  | 9.06838028 |
| Bi | 12.91681785 | 8.77817157  | 5.84012799 |
| Bi | 12.42778093 | 8.29506831  | 8.71627713 |

**PdBi<sub>15</sub>**

|    |             |             |            |
|----|-------------|-------------|------------|
| Pd | 7.88688368  | 7.01219986  | 6.98097534 |
| Bi | 8.85746889  | 9.46474928  | 7.87324203 |
| Bi | 11.47160898 | 10.30580125 | 6.06223397 |
| Bi | 4.41445555  | 9.02200521  | 6.09502849 |
| Bi | 6.11566825  | 10.72126103 | 7.78455804 |
| Bi | 6.22492890  | 7.09658583  | 4.61605988 |
| Bi | 8.84644341  | 8.69673009  | 4.95172636 |
| Bi | 5.61062920  | 7.78742161  | 8.54037092 |
| Bi | 9.63693381  | 5.75831277  | 5.02404743 |
| Bi | 5.88339222  | 5.12590627  | 6.87753587 |
| Bi | 8.79780480  | 4.42121471  | 7.60400266 |
| Bi | 13.35380214 | 9.27507158  | 8.07402092 |
| Bi | 9.30277155  | 6.74843646  | 9.39438878 |
| Bi | 12.43624766 | 5.68227384  | 6.00264877 |
| Bi | 12.22783004 | 6.57395739  | 8.81450130 |
| Bi | 13.52955906 | 8.38543282  | 5.21511299 |

**Pd<sub>2</sub>**

|    |            |            |            |
|----|------------|------------|------------|
| Pd | 3.17958920 | 4.39000000 | 5.62877600 |
| Pd | 5.60041080 | 4.39000000 | 5.62877600 |

**Pd<sub>2</sub>Bi**

|    |            |            |            |
|----|------------|------------|------------|
| Pd | 6.82999311 | 4.76943874 | 4.48000000 |
| Pd | 4.34530880 | 5.14729072 | 4.48000000 |
| Bi | 5.91784520 | 7.09085019 | 4.48000000 |

**Pd<sub>2</sub>Bi<sub>2</sub>**

|    |            |            |            |
|----|------------|------------|------------|
| Pd | 5.93083893 | 4.48603143 | 4.48587192 |
| Pd | 5.84527024 | 7.25343255 | 4.51116638 |
| Bi | 4.47659518 | 5.80731646 | 6.21385515 |
| Bi | 7.29722965 | 5.89125984 | 6.21600855 |

**Pd<sub>2</sub>Bi<sub>3</sub>**

|    |            |            |            |
|----|------------|------------|------------|
| Pd | 6.67474965 | 6.36152187 | 3.94709325 |
| Pd | 4.50937075 | 6.37405284 | 5.73402129 |
| Bi | 6.31956006 | 4.51415156 | 5.79803432 |
| Bi | 8.57967347 | 6.35289649 | 5.90533525 |
| Bi | 6.34220607 | 8.20188247 | 5.79957838 |

**Pd<sub>2</sub>Bi<sub>4</sub>**

|    |            |            |            |
|----|------------|------------|------------|
| Pd | 7.83873403 | 5.35620646 | 6.17601846 |
| Pd | 4.63097464 | 5.38990257 | 6.17498743 |
| Bi | 6.24366693 | 5.81109093 | 4.19379554 |
| Bi | 6.24430444 | 6.21002642 | 8.02622095 |
| Bi | 4.80257648 | 8.02894366 | 5.90654347 |
| Bi | 7.74014547 | 7.99443295 | 5.91175927 |

**Pd<sub>2</sub>Bi<sub>5</sub>**

|    |            |            |            |
|----|------------|------------|------------|
| Pd | 6.86058055 | 6.68469876 | 7.20159385 |
| Pd | 6.89484321 | 6.68091609 | 4.48108023 |
| Bi | 4.80669542 | 5.29347559 | 5.83115863 |
| Bi | 4.88281475 | 8.16470123 | 5.81954952 |
| Bi | 9.47238470 | 6.62528534 | 5.82265619 |
| Bi | 7.60388453 | 4.41704402 | 5.85776381 |
| Bi | 7.71665085 | 8.91610397 | 5.86333478 |

**Pd<sub>2</sub>Bi<sub>6</sub>**

|    |            |            |            |
|----|------------|------------|------------|
| Pd | 6.49528683 | 6.65733360 | 7.35158239 |
| Pd | 6.52080905 | 6.64185329 | 4.60931996 |
| Bi | 9.11738720 | 6.67904331 | 7.50196638 |
| Bi | 7.49144094 | 4.45139553 | 5.97914765 |
| Bi | 4.51233354 | 8.08547575 | 5.97438798 |
| Bi | 4.54234667 | 5.19442398 | 5.97259414 |
| Bi | 9.15218143 | 6.66384252 | 4.48909649 |
| Bi | 7.44101833 | 8.86931472 | 5.95774110 |

**Pd<sub>2</sub>Bi<sub>7</sub>**

|    |            |            |            |
|----|------------|------------|------------|
| Pd | 6.37768429 | 6.84491392 | 7.44077130 |
| Pd | 6.37734974 | 6.90657430 | 4.72111419 |
| Bi | 8.32545740 | 5.07898463 | 4.53629860 |
| Bi | 5.62442975 | 4.59069265 | 6.03778382 |
| Bi | 4.02155794 | 7.18706510 | 6.09172335 |
| Bi | 8.72723126 | 8.11353472 | 7.63248599 |
| Bi | 6.25132409 | 9.28074364 | 6.12872541 |
| Bi | 8.72321673 | 8.22131118 | 4.59553109 |
| Bi | 8.29881931 | 4.97418647 | 7.57033325 |

**Pd<sub>2</sub>Bi<sub>8</sub>**

|    |            |            |            |
|----|------------|------------|------------|
| Pd | 7.27333454 | 6.33109239 | 7.59717886 |
| Pd | 7.26731161 | 6.35152963 | 4.84262478 |
| Bi | 7.30391476 | 9.03692510 | 7.78220738 |
| Bi | 7.27262168 | 9.08792141 | 4.74803308 |
| Bi | 9.76485123 | 7.27193837 | 4.66484862 |
| Bi | 9.80203631 | 7.19050744 | 7.73619283 |
| Bi | 4.76335626 | 7.26961532 | 7.73043323 |
| Bi | 4.77463107 | 7.23984443 | 4.66523425 |
| Bi | 5.60979689 | 4.68347461 | 6.24937154 |
| Bi | 8.90892519 | 4.67533013 | 6.18250799 |

**Pd<sub>2</sub>Bi<sub>9</sub>**

|    |             |            |            |
|----|-------------|------------|------------|
| Pd | 7.98999565  | 7.07228259 | 5.34821537 |
| Pd | 6.65571315  | 7.02474479 | 7.78692123 |
| Bi | 7.49452026  | 4.65111109 | 6.81508009 |
| Bi | 5.90776698  | 5.49372453 | 4.37589413 |
| Bi | 9.32066642  | 6.95963471 | 8.26069395 |
| Bi | 10.30199079 | 5.59097560 | 5.66098951 |
| Bi | 10.31345217 | 8.50557457 | 5.79944854 |
| Bi | 4.39863652  | 8.44860501 | 7.12357120 |
| Bi | 4.48096332  | 5.46653801 | 7.08593369 |
| Bi | 5.79704159  | 8.56749863 | 4.41632381 |
| Bi | 7.43785415  | 9.41384547 | 6.81544648 |

**Pd<sub>2</sub>Bi<sub>10</sub>**

|    |            |            |            |
|----|------------|------------|------------|
| Pd | 6.94125527 | 7.09326984 | 7.37372447 |
| Pd | 6.94175507 | 7.13948716 | 4.72744455 |
| Bi | 9.31275687 | 8.63918014 | 4.53101850 |
| Bi | 9.35753048 | 5.67591969 | 4.52990478 |
| Bi | 9.36187595 | 8.54862437 | 7.58398726 |
| Bi | 6.95177880 | 9.70224969 | 6.14373133 |
| Bi | 9.28639251 | 5.58270219 | 7.57845499 |
| Bi | 4.54313940 | 8.55208320 | 7.60564425 |
| Bi | 4.58062428 | 5.58277336 | 7.56214870 |
| Bi | 6.93223113 | 4.52730469 | 5.93414645 |
| Bi | 4.57044783 | 8.66034588 | 4.55457607 |
| Bi | 4.51994042 | 5.69916357 | 4.50904677 |

**Pd<sub>2</sub>Bi<sub>11</sub>**

|    |             |            |            |
|----|-------------|------------|------------|
| Pd | 9.35536281  | 6.98442060 | 6.53323981 |
| Pd | 6.74864976  | 7.04084489 | 6.36519756 |
| Bi | 8.13265891  | 4.57273822 | 7.40958080 |
| Bi | 7.81291287  | 7.36785885 | 8.89845098 |
| Bi | 10.06044465 | 9.46220721 | 5.44969070 |
| Bi | 11.55649348 | 8.08233736 | 7.75044388 |
| Bi | 11.15354772 | 4.97775294 | 7.42392974 |
| Bi | 7.42280838  | 9.61867168 | 6.92008020 |
| Bi | 11.68362044 | 6.80167998 | 5.07936413 |
| Bi | 4.48630739  | 8.62649084 | 6.09483830 |
| Bi | 7.95836591  | 5.42545764 | 4.59250362 |
| Bi | 4.71286063  | 6.44408298 | 8.12407058 |
| Bi | 4.70592732  | 5.78339133 | 5.16181440 |

**Pd<sub>2</sub>Bi<sub>12</sub>**

|    |             |            |            |
|----|-------------|------------|------------|
| Pd | 9.26377313  | 7.00466791 | 6.68689961 |
| Pd | 6.60440715  | 6.84224070 | 6.69086366 |
| Bi | 7.78137324  | 8.86852247 | 5.11477820 |
| Bi | 8.15252621  | 5.70142018 | 4.45367886 |
| Bi | 11.11514605 | 8.58799782 | 5.32650676 |
| Bi | 4.54981776  | 8.00941573 | 5.19029606 |
| Bi | 11.13784321 | 5.55418898 | 5.12803634 |
| Bi | 6.83588287  | 4.05480353 | 6.62829593 |
| Bi | 11.06218603 | 8.39729415 | 8.32099950 |
| Bi | 11.07148288 | 5.36468827 | 8.18986439 |
| Bi | 4.11469279  | 5.58227187 | 6.87428140 |
| Bi | 4.61120907  | 8.24031484 | 8.14011287 |
| Bi | 7.79268975  | 8.94645213 | 8.15385313 |
| Bi | 8.11040183  | 5.63556159 | 8.84600867 |

**Pd<sub>2</sub>Bi<sub>13</sub>**

|    |             |             |            |
|----|-------------|-------------|------------|
| Pd | 7.00557883  | 7.87753355  | 6.73918997 |
| Pd | 9.90767862  | 7.79887719  | 6.79343578 |
| Bi | 6.55335653  | 10.31379689 | 5.26809131 |
| Bi | 8.45592023  | 8.17439170  | 4.40517849 |
| Bi | 6.03795047  | 5.51445481  | 5.55016148 |
| Bi | 4.44703757  | 8.11132346  | 5.71564923 |
| Bi | 10.77972041 | 5.26192735  | 5.87042934 |
| Bi | 5.09087689  | 6.46695228  | 8.16561563 |
| Bi | 8.31114900  | 5.61396425  | 7.71628200 |
| Bi | 11.92745921 | 6.60546382  | 8.20489477 |
| Bi | 10.41040013 | 10.33730631 | 8.02713729 |
| Bi | 10.74084729 | 9.99139331  | 5.09937257 |
| Bi | 8.25233569  | 8.45195559  | 9.11561813 |
| Bi | 12.58340263 | 7.62793283  | 5.47866596 |
| Bi | 7.53687900  | 11.14951074 | 7.98403971 |

**Pd<sub>2</sub>Bi<sub>14</sub>**

|    |             |            |            |
|----|-------------|------------|------------|
| Pd | 7.45446664  | 7.06270127 | 6.76430983 |
| Pd | 10.08932660 | 6.71534306 | 6.95746450 |
| Bi | 8.75913155  | 8.65057619 | 8.76088625 |
| Bi | 11.08009409 | 8.24981728 | 4.50681888 |
| Bi | 5.69274074  | 9.05039108 | 7.95624661 |
| Bi | 8.66256187  | 9.38830905 | 5.83904969 |
| Bi | 5.86145280  | 8.45750234 | 4.97618515 |
| Bi | 5.53127049  | 5.44812600 | 5.50720615 |
| Bi | 10.74320300 | 5.29863220 | 4.59293522 |
| Bi | 8.33921700  | 4.42866566 | 6.23795340 |
| Bi | 11.89977847 | 7.46909614 | 8.92898940 |
| Bi | 12.14682703 | 4.84350038 | 7.18450596 |
| Bi | 12.86690899 | 9.20743706 | 6.68698759 |
| Bi | 14.40592174 | 6.77750768 | 7.33868397 |
| Bi | 8.27935262  | 5.59015215 | 9.05356106 |
| Bi | 5.22948562  | 6.08141046 | 8.46298437 |

**Pd<sub>2</sub>Bi<sub>15</sub>**

|    |             |             |            |
|----|-------------|-------------|------------|
| Pd | 10.30258912 | 7.46123674  | 6.96956936 |
| Pd | 7.67574087  | 6.98814767  | 6.26714998 |
| Bi | 12.37663186 | 8.80543225  | 8.28704210 |
| Bi | 8.97548743  | 4.98035339  | 7.81484507 |
| Bi | 12.51203894 | 5.95246035  | 6.20243646 |
| Bi | 9.72581496  | 10.24035547 | 8.57305717 |
| Bi | 11.57006748 | 6.03920852  | 9.12714952 |
| Bi | 3.96342510  | 7.58144095  | 7.65919173 |
| Bi | 5.76668878  | 5.22606787  | 7.37435876 |
| Bi | 5.83320792  | 9.80960703  | 8.48345066 |
| Bi | 8.02979609  | 7.82638420  | 8.95948267 |
| Bi | 12.12010063 | 8.95013077  | 5.29393174 |
| Bi | 6.66033691  | 9.63621867  | 5.66257064 |
| Bi | 9.77015521  | 5.30109331  | 4.97404790 |
| Bi | 5.19965298  | 6.82307319  | 5.01535294 |
| Bi | 9.30446855  | 8.35105326  | 4.38516585 |
| Bi | 9.35986316  | 11.13717477 | 5.78739296 |

**Pd<sub>3</sub>**

|    |            |            |            |
|----|------------|------------|------------|
| Pd | 4.53573230 | 6.43487173 | 4.39000000 |
| Pd | 5.29841773 | 4.16164275 | 4.39000000 |
| Pd | 6.89801247 | 5.95467752 | 4.39000000 |

**Pd<sub>3</sub>Bi**

|    |            |            |            |
|----|------------|------------|------------|
| Pd | 5.28351958 | 7.12949371 | 5.63093208 |
| Pd | 7.04047007 | 5.30876824 | 6.19704104 |
| Pd | 4.49476830 | 4.71505024 | 6.06768061 |
| Bi | 5.82308604 | 5.27314381 | 3.95761627 |

**Pd<sub>3</sub>Bi<sub>2</sub>**

|    |            |            |            |
|----|------------|------------|------------|
| Pd | 8.57018458 | 6.00665915 | 5.57156440 |
| Pd | 4.38883197 | 6.00559150 | 5.57404843 |
| Pd | 6.48270295 | 5.95706751 | 7.29597332 |
| Bi | 6.48005908 | 4.51768618 | 5.06048385 |
| Bi | 6.47864642 | 7.50309366 | 5.11579644 |

**Pd<sub>3</sub>Bi<sub>3</sub>**

|    |            |            |            |
|----|------------|------------|------------|
| Pd | 8.60860080 | 6.40301306 | 6.28461320 |
| Pd | 6.39570979 | 6.40874064 | 8.03791022 |
| Pd | 6.48933312 | 6.40943256 | 4.46091980 |
| Bi | 4.41006203 | 6.40776682 | 6.20600475 |
| Bi | 6.76668055 | 8.32804417 | 6.25467724 |
| Bi | 6.76104185 | 4.48313293 | 6.25393978 |

**Pd<sub>3</sub>Bi<sub>4</sub>**

|    |            |            |            |
|----|------------|------------|------------|
| Pd | 7.15762262 | 7.88804696 | 6.73988196 |
| Pd | 6.97541692 | 5.65792139 | 4.41749279 |
| Pd | 7.01272911 | 4.74625518 | 7.47425703 |
| Bi | 5.22962232 | 7.51044614 | 5.00662449 |
| Bi | 8.81887325 | 6.02109762 | 6.16365914 |
| Bi | 5.06910189 | 4.46168503 | 5.74264114 |



Bi 5.23929489 6.60842493 7.98242851

**Pd<sub>3</sub>Bi<sub>5</sub>**

Pd 6.40810156 6.49647107 7.61961601  
Pd 6.41712725 6.48496206 4.51565920  
Pd 8.38829366 8.09176115 6.01313631  
Bi 5.79872811 8.52964881 6.05473323  
Bi 4.12829271 6.01281982 6.04089586  
Bi 6.61329675 4.30813568 6.08355906  
Bi 8.98091108 5.94864439 4.56462313  
Bi 8.97940680 6.02841603 7.57491719

**Pd<sub>3</sub>Bi<sub>6</sub>**

Pd 8.71057674 6.45127095 4.35789476  
Pd 6.98374050 6.42139945 6.85247109  
Pd 5.26060669 6.39298822 4.35775716  
Bi 6.95755811 8.36599325 4.76438485  
Bi 9.36822418 7.82897230 6.66448806  
Bi 9.38409568 4.97144032 6.60925356  
Bi 7.01316426 4.47187403 4.71920654  
Bi 4.63790171 4.94037754 6.65001724  
Bi 4.55540063 7.79793514 6.62411425

**Pd<sub>3</sub>Bi<sub>7</sub>**

Pd 7.89811566 5.40000026 7.36081158  
Pd 6.86491601 6.99243783 4.94411238  
Pd 7.78047498 8.19172118 7.47664176  
Bi 5.74029732 6.71230992 8.23137400  
Bi 6.10579876 4.48730898 5.64891504  
Bi 4.24719251 6.90046151 5.59226344  
Bi 9.08225354 5.48083002 4.77904971  
Bi 5.98795425 9.38132208 5.93582034  
Bi 10.08799399 6.90709143 7.30547949  
Bi 9.00246754 8.60817680 4.96636970

**Pd<sub>3</sub>Bi<sub>8</sub>**

Pd 5.40499406 6.87802165 7.44383674  
Pd 7.21309454 6.86745016 5.33517722  
Pd 9.01185134 6.90330789 7.45258761  
Bi 4.41175362 6.84805533 4.79850945  
Bi 5.62097984 9.18732820 6.05765769  
Bi 7.19302296 8.46253407 8.73800147  
Bi 5.66443943 4.54852190 6.08262110  
Bi 10.01045574 6.88984576 4.79884803  
Bi 7.21499788 5.34448089 8.76050370  
Bi 8.76006259 9.20537407 6.05800928  
Bi 8.80017692 4.57239035 6.09594273

**Pd<sub>3</sub>Bi<sub>9</sub>**

Pd 6.67858466 5.22759605 7.00019821  
Pd 6.48577433 7.84594117 8.40919895  
Pd 6.50019409 7.84297994 5.58589247  
Bi 7.75497685 5.66493187 4.52507569  
Bi 9.33430836 4.91014093 7.00984238  
Bi 9.13778533 8.27672300 8.52674866  
Bi 7.19911412 10.11488919 6.99746873  
Bi 4.58920825 5.90595638 5.42878627  
Bi 4.57328673 5.91020876 8.55457538  
Bi 7.73500890 5.67180867 9.48023380  
Bi 4.29248393 8.56198351 6.98727866  
Bi 9.15085627 8.27244255 5.47875680

**Pd<sub>3</sub>Bi<sub>10</sub>**

Pd 6.85311305 5.48378528 7.97722378  
Pd 6.84478375 8.42077404 8.07563346  
Pd 6.83968111 7.04776933 5.56160636  
Bi 4.76773992 8.56636398 6.37288577  
Bi 4.82118255 6.92678220 9.03043597  
Bi 4.76617911 5.46484391 6.27807136  
Bi 9.34767274 4.59031176 8.36040745  
Bi 9.32703707 9.29639654 8.55153189  
Bi 9.34978883 7.09855457 4.58828102  
Bi 7.89808831 9.55527125 5.81186577  
Bi 7.91198549 4.53575223 5.62683890

Bi 8.00796011 6.87487865 10.00938430

Bi 10.81522146 7.00116377 7.23280197

**Pd<sub>3</sub>Bi<sub>11</sub>**

Pd 8.50141351 8.32156059 6.27436661  
Pd 6.89988191 7.68696169 8.53559336  
Pd 7.87074165 5.57380834 6.89649775  
Bi 6.11858178 8.98876092 4.88676993  
Bi 7.38383427 6.38094888 4.21578940  
Bi 10.26046844 6.91089821 4.62779548  
Bi 10.63661698 5.21900359 7.04391225  
Bi 11.24369551 8.20273149 7.10604991  
Bi 4.53377971 7.79430049 7.24997118  
Bi 9.14817385 9.17259154 8.99735707  
Bi 6.76865676 10.20676283 7.53221058  
Bi 5.32136514 5.07860318 6.04321228  
Bi 8.82283930 5.93054012 9.43726711  
Bi 5.93544819 5.19859714 8.96380804

**Pd<sub>3</sub>Bi<sub>12</sub>**

Pd 8.31317954 8.51023868 7.64919780  
Pd 6.78078375 6.49638835 6.29367354  
Pd 9.81855324 6.47140532 6.32891253  
Bi 8.28774992 7.38132820 10.32672413  
Bi 8.32001385 7.84365219 4.55575970  
Bi 10.34371717 4.14861744 7.59939554  
Bi 4.47725510 6.83494154 7.61921284  
Bi 10.59633795 8.82398808 9.15599364  
Bi 6.03141453 8.88414314 9.15199761  
Bi 8.19580186 4.49311307 9.66773590  
Bi 10.69565114 9.02667879 6.10353695  
Bi 5.97063558 9.08428316 6.09529331  
Bi 8.30871733 4.49056237 5.29102753  
Bi 12.12457011 6.73561606 7.65246861  
Bi 6.14666892 4.18163861 7.50967747

**Pd<sub>3</sub>Bi<sub>13</sub>**

Pd 8.40542429 6.76695830 8.17509931  
Pd 9.80738300 8.29056292 6.29355470  
Pd 6.91124159 8.23379598 6.31955827  
Bi 8.35883519 7.48805593 4.15634444  
Bi 6.24181828 10.34100351 7.88330558  
Bi 6.83731508 4.49207020 7.69805002  
Bi 12.26995947 7.96668240 7.30581878  
Bi 6.06831865 6.69863501 9.55490350  
Bi 10.74847285 6.59905054 9.53008257  
Bi 8.39335431 9.05082792 9.67075853  
Bi 5.88911047 5.96702611 5.23740330  
Bi 10.88623128 6.05413034 5.22427893  
Bi 8.30722390 10.45991419 5.58237238  
Bi 4.44667298 7.87597344 7.29692017  
Bi 9.91638107 4.47206243 7.61346272  
Bi 10.43711433 10.41067478 7.83718279

**Pd<sub>3</sub>Bi<sub>14</sub>**

Pd 8.27297602 5.89077294 7.12381366  
Pd 7.18574903 8.39887841 6.62479748  
Pd 10.31417217 7.79536472 7.05476418  
Bi 7.59574762 7.04143461 9.50606352  
Bi 9.02188493 6.60898936 4.46233713  
Bi 4.46870061 7.60198099 6.91720555  
Bi 5.78661167 5.09051822 8.08892808  
Bi 6.22796503 5.87153775 5.19519161  
Bi 5.58519205 9.90755485 8.45600231  
Bi 12.16481836 8.44718969 9.10332700  
Bi 13.07198181 7.05734330 6.62007663  
Bi 8.75507317 9.80698977 8.44961779  
Bi 10.34826178 5.86141964 9.16670294  
Bi 12.08867850 9.84732360 6.46383369  
Bi 10.73338557 4.93354121 6.30097872  
Bi 9.29859086 9.50598754 5.00553304  
Bi 7.14441298 11.23720080 6.32587691

**Pd<sub>3</sub>Bi<sub>15</sub>**

|    |             |             |            |
|----|-------------|-------------|------------|
| Pd | 8.88449324  | 6.71563882  | 7.54242972 |
| Pd | 11.15022515 | 8.16250352  | 6.90323204 |
| Pd | 6.86350167  | 8.31657376  | 6.84887249 |
| Bi | 6.25403367  | 5.68673823  | 7.99725282 |
| Bi | 9.07188352  | 9.58237618  | 8.26817427 |
| Bi | 4.59577357  | 9.66498574  | 7.83179558 |
| Bi | 6.67695662  | 8.12967537  | 9.61958225 |
| Bi | 11.31060389 | 5.29045339  | 7.34361675 |
| Bi | 10.79443539 | 7.49588606  | 9.59971903 |
| Bi | 13.12453100 | 9.33867084  | 8.55057131 |
| Bi | 7.27995049  | 6.06643455  | 5.03810681 |
| Bi | 13.56917828 | 8.80047961  | 5.61886937 |
| Bi | 11.63306983 | 6.57869630  | 4.66401627 |
| Bi | 9.09979424  | 8.47292770  | 5.03827373 |
| Bi | 4.84840876  | 8.60435128  | 5.03229251 |
| Bi | 6.47271561  | 10.88046754 | 5.86660315 |
| Bi | 11.65963177 | 10.92098730 | 6.51370161 |
| Bi | 8.56422131  | 4.02322366  | 6.91121627 |

**Pd<sub>4</sub>**

|    |            |            |            |
|----|------------|------------|------------|
| Pd | 4.40982268 | 5.89961237 | 6.49082460 |
| Pd | 6.41368183 | 4.40394545 | 6.02071461 |
| Pd | 6.21079087 | 6.60703879 | 4.85652189 |
| Pd | 4.59817662 | 4.74377821 | 4.28752173 |

**Pd<sub>4</sub>Bi**

|    |            |            |            |
|----|------------|------------|------------|
| Pd | 6.46396366 | 4.71379127 | 4.79349351 |
| Pd | 4.34979087 | 6.06426853 | 5.40967913 |
| Pd | 8.55793644 | 6.07366387 | 5.41620970 |
| Pd | 6.44939126 | 7.42100935 | 4.78629454 |
| Bi | 6.44728736 | 6.07397948 | 6.98765561 |

**Pd<sub>4</sub>Bi<sub>2</sub>**

|    |            |            |            |
|----|------------|------------|------------|
| Pd | 6.47553050 | 8.48172751 | 6.17887050 |
| Pd | 6.47553050 | 4.45223049 | 6.17887050 |
| Pd | 4.46026770 | 6.46697900 | 6.17835147 |
| Pd | 8.49079330 | 6.46697900 | 6.17938953 |
| Bi | 6.47616510 | 6.46697900 | 4.51130457 |
| Bi | 6.47489590 | 6.46697900 | 7.84643643 |

**Pd<sub>4</sub>Bi<sub>3</sub>**

|    |            |            |            |
|----|------------|------------|------------|
| Pd | 4.97950402 | 7.45396983 | 6.66944994 |
| Pd | 4.97758211 | 4.87130753 | 6.66974714 |
| Pd | 7.54931301 | 4.67957656 | 5.65188900 |
| Pd | 7.54634894 | 7.64473956 | 5.65494768 |
| Bi | 5.71149422 | 6.16122147 | 4.48561695 |
| Bi | 9.58511551 | 6.16342740 | 6.30254500 |
| Bi | 7.02162716 | 6.15846097 | 7.90737179 |

**Pd<sub>4</sub>Bi<sub>4</sub>**

|    |            |            |            |
|----|------------|------------|------------|
| Pd | 4.67899375 | 5.82438818 | 4.46154356 |
| Pd | 7.19605225 | 4.46154356 | 6.66296382 |
| Pd | 4.67899375 | 6.66296382 | 8.02580844 |
| Pd | 7.19605225 | 8.02580844 | 5.82438818 |
| Bi | 4.59830281 | 8.03973184 | 5.82418838 |
| Bi | 7.27674319 | 5.82418838 | 4.44762016 |
| Bi | 4.59830281 | 4.44762016 | 6.66316362 |
| Bi | 7.27674319 | 6.66316362 | 8.03973184 |

**Pd<sub>4</sub>Bi<sub>5</sub>**

|    |            |            |            |
|----|------------|------------|------------|
| Pd | 8.41784333 | 8.54813537 | 6.41630326 |
| Pd | 6.35298732 | 6.68652428 | 4.93515830 |
| Pd | 6.35379951 | 6.67746314 | 7.91357346 |
| Pd | 8.41862752 | 4.81685438 | 6.43253129 |
| Bi | 5.83913638 | 8.85032058 | 6.42961461 |
| Bi | 8.96230549 | 6.67631379 | 4.68849996 |
| Bi | 8.96336974 | 6.68894326 | 8.15956366 |
| Bi | 5.84014461 | 4.51373366 | 6.41952831 |
| Bi | 3.86661810 | 6.68206053 | 6.42480916 |

**Pd<sub>4</sub>Bi<sub>6</sub>**

|    |             |            |            |
|----|-------------|------------|------------|
| Pd | 8.01419720  | 6.96676486 | 4.57859837 |
| Pd | 9.15206478  | 6.15744387 | 7.35224593 |
| Pd | 6.74052123  | 4.70462048 | 4.72374569 |
| Pd | 6.21250903  | 7.19467035 | 7.27936140 |
| Bi | 9.46922418  | 4.59498560 | 5.16039593 |
| Bi | 10.63113026 | 7.25202695 | 5.15282945 |
| Bi | 6.97401635  | 4.68932109 | 7.34559447 |
| Bi | 4.55420198  | 5.89872049 | 5.53527087 |
| Bi | 8.35841508  | 8.57593332 | 6.72863919 |
| Bi | 5.77280491  | 8.41112009 | 4.79817871 |

**Pd<sub>4</sub>Bi<sub>7</sub>**

|    |            |            |            |
|----|------------|------------|------------|
| Pd | 7.04525864 | 8.14662089 | 7.47195073 |
| Pd | 6.08807851 | 5.58434167 | 7.32643724 |
| Pd | 7.13531414 | 7.01770339 | 4.92188753 |
| Pd | 9.91572388 | 7.79773994 | 7.22041160 |
| Bi | 5.33393181 | 9.01473060 | 5.32787674 |
| Bi | 4.62269120 | 6.02393532 | 5.07364526 |
| Bi | 7.55393889 | 4.36250719 | 5.47322590 |
| Bi | 9.74348306 | 6.36370429 | 5.01191073 |
| Bi | 8.53733861 | 9.31709690 | 5.55991210 |
| Bi | 8.44779919 | 6.00503743 | 8.31890445 |
| Bi | 4.42157873 | 7.58678833 | 7.81470122 |

**Pd<sub>4</sub>Bi<sub>8</sub>**

|    |            |            |            |
|----|------------|------------|------------|
| Pd | 7.14353968 | 6.01643624 | 5.35359053 |
| Pd | 5.75052041 | 8.49853228 | 6.67175792 |
| Pd | 7.14861722 | 5.98378992 | 8.00029773 |
| Pd | 8.56723873 | 8.48338136 | 6.72233688 |
| Bi | 7.19653202 | 8.59130800 | 4.46321903 |
| Bi | 9.77427704 | 6.66677424 | 5.08543115 |
| Bi | 9.77311850 | 6.63191898 | 8.29366640 |
| Bi | 8.84328522 | 4.27192478 | 6.66105132 |
| Bi | 7.12959432 | 8.54744078 | 8.93214558 |
| Bi | 4.52385848 | 6.68181676 | 5.07790579 |
| Bi | 5.43386791 | 4.28055728 | 6.65361953 |
| Bi | 4.53314108 | 6.65700338 | 8.28416279 |

**Pd<sub>4</sub>Bi<sub>9</sub>**

|    |             |            |            |
|----|-------------|------------|------------|
| Pd | 8.20353448  | 7.11656023 | 5.51064826 |
| Pd | 5.75067675  | 6.10706201 | 6.90097779 |
| Pd | 8.19498949  | 7.12303715 | 8.28507018 |
| Pd | 6.12316058  | 8.78371212 | 6.89527881 |
| Bi | 5.67302381  | 7.48912802 | 4.49108340 |
| Bi | 7.20597178  | 4.57274495 | 5.27169141 |
| Bi | 9.66677031  | 5.22724728 | 6.90526927 |
| Bi | 10.17105411 | 8.46857975 | 6.90326842 |
| Bi | 7.99544818  | 9.84707330 | 8.50070676 |
| Bi | 8.00147571  | 9.84050925 | 5.29149294 |
| Bi | 5.66636332  | 7.50250299 | 9.30459365 |
| Bi | 3.64676817  | 7.73764692 | 6.89603776 |
| Bi | 7.20654720  | 4.57868454 | 8.53721885 |

**Pd<sub>4</sub>Bi<sub>10</sub>**

|    |             |             |            |
|----|-------------|-------------|------------|
| Pd | 7.45678114  | 7.21853468  | 8.08615294 |
| Pd | 5.69964654  | 7.03120398  | 5.81270823 |
| Pd | 8.56369801  | 5.80346812  | 5.85211719 |
| Pd | 8.25106792  | 8.85994892  | 5.86325191 |
| Bi | 7.17088055  | 10.13972670 | 8.01710442 |
| Bi | 6.31903525  | 4.49003060  | 5.19952981 |
| Bi | 7.79687656  | 4.27662119  | 7.97998868 |
| Bi | 10.28201477 | 6.00391037  | 7.93689467 |
| Bi | 10.50169226 | 7.55272061  | 5.20849061 |
| Bi | 9.94364626  | 8.92790376  | 7.98680207 |
| Bi | 7.51108108  | 7.24647616  | 3.75629778 |
| Bi | 5.08635456  | 5.43507372  | 7.93187079 |
| Bi | 4.76153100  | 8.44303597  | 7.94201133 |
| Bi | 5.77175613  | 9.65165321  | 5.21611259 |

Bi 11.76363617 9.63221726 6.75464427

**Pd<sub>4</sub>Bi<sub>11</sub>**

Pd 7.34286968 8.87430546 5.70414109  
Pd 5.42015506 7.07710203 6.73335754  
Pd 8.07289873 6.02401893 6.36119391  
Pd 7.63196046 7.95981613 8.34640749  
Bi 10.81823086 6.12319571 6.64515715  
Bi 6.08548046 5.42923011 8.77700284  
Bi 9.37364931 7.54868633 4.35371602  
Bi 4.73648041 9.61827477 6.11460044  
Bi 9.06306585 5.69581583 9.02887562  
Bi 7.04228807 10.61910392 7.77913056  
Bi 9.71566712 10.01762478 6.10376542  
Bi 5.04402571 8.53405073 8.99313663  
Bi 10.34972361 8.45740658 8.59514309  
Bi 6.33113468 6.81254001 4.16899550  
Bi 5.77507749 4.47603359 5.94674053

**Pd<sub>4</sub>Bi<sub>12</sub>**

Pd 7.29591237 8.73130706 7.00036090  
Pd 9.95580192 7.33727726 8.39680780  
Pd 7.13468993 5.92779393 7.01488723  
Pd 9.75374074 7.35524992 5.65009849  
Bi 9.17912828 9.9998495 5.48193204  
Bi 7.30779360 7.32043895 4.47446023  
Bi 9.25302924 9.94188319 8.53821891  
Bi 5.01178092 8.96610064 8.53613171  
Bi 4.73570654 5.93885743 5.56006886  
Bi 4.91831841 8.96306591 5.54345533  
Bi 11.65239745 8.94388526 6.90977095  
Bi 4.83163830 5.94283498 8.54240731  
Bi 9.13723129 4.74812487 8.52152133  
Bi 9.07027307 4.72963661 5.46691543  
Bi 11.57588293 5.68139179 6.90411170  
Bi 7.45910699 7.32566870 9.52309576

**Pd<sub>4</sub>Bi<sub>13</sub>**

Pd 9.27384568 9.12202891 6.98187075  
Pd 8.56334908 6.54928925 5.71313373  
Pd 8.63740138 6.76449765 8.51972305  
Pd 6.54860343 8.06080052 7.07372328  
Bi 10.66048095 8.34711723 9.44862132  
Bi 7.80430441 9.48543319 9.40051687  
Bi 7.06818233 10.76683277 6.80057800  
Bi 7.64947724 8.99867685 4.47511828  
Bi 10.58074565 8.11349272 4.67345333  
Bi 12.03661653 9.38003385 7.00813663  
Bi 13.07674459 6.55339999 7.10136560  
Bi 7.09995863 4.84076146 7.32234805  
Bi 10.83223584 5.12818434 5.67995727  
Bi 4.40191856 6.27425838 7.30827147  
Bi 10.84659928 5.26600620 8.69235983  
Bi 6.01145574 6.46595336 4.77360707  
Bi 6.18099287 6.94241043 9.64306829

**Pd<sub>4</sub>Bi<sub>14</sub>**

Pd 8.93636022 9.94446948 6.93013866  
Pd 5.96962097 9.41836758 7.04961194  
Pd 7.37025294 6.97219654 6.93999994  
Pd 10.07753327 7.49296011 7.05559614  
Bi 4.45001798 7.15425390 7.19484818  
Bi 8.98906178 8.51596946 4.66441672  
Bi 7.24230829 11.42969510 8.43408321  
Bi 6.29668794 8.55294169 9.53174838  
Bi 7.11561963 11.25221571 5.39514930  
Bi 5.96583650 8.30581067 4.61487148  
Bi 9.26932699 8.86015656 9.35982204  
Bi 9.21160151 5.29550417 5.62906689  
Bi 6.14395423 5.08656511 8.64024311  
Bi 9.23662195 5.44260107 8.61647488  
Bi 12.31853121 6.94764343 5.52823453  
Bi 12.44483978 7.26749919 8.44751254  
Bi 5.93258610 4.99541763 5.64029078

**Pd<sub>4</sub>Bi<sub>15</sub>**

Pd 7.85313275 9.96014489 6.39918335  
Pd 7.85142247 9.86263974 9.95930087  
Pd 7.84936350 6.30175025 9.86205922  
Pd 7.85087452 6.39971073 6.30119369  
Bi 8.92537531 4.48120415 8.02858260  
Bi 8.92602289 8.02843381 11.77988240  
Bi 8.92934381 11.77995922 8.23303397  
Bi 8.92909474 8.23268077 4.48166913  
Bi 10.58824378 10.33009857 6.05202416  
Bi 10.58636746 10.20945302 10.33164856  
Bi 10.58424207 5.92937358 10.21090956  
Bi 10.58585272 6.04992156 5.93110629  
Bi 5.89071715 5.62981680 8.06112115  
Bi 5.89119869 8.06388432 10.63176426  
Bi 5.89339049 10.63389965 8.19781233  
Bi 5.89310822 8.20116559 5.62786846  
Bi 4.13373377 8.13268757 8.12915778  
Bi 11.78013915 8.12880103 8.13188965  
Bi 8.80213591 8.13054103 8.13068633

**Pd<sub>5</sub>**

Pd 8.54958318 5.63922718 5.59004893  
Pd 6.47839585 6.98110163 4.96310258  
Pd 6.48229771 5.50907166 7.07167710  
Pd 4.41453260 5.63646559 5.59108913  
Pd 6.48267363 4.41364393 4.74629476

**Pd<sub>5</sub>Bi**

Pd 6.15829828 6.10477145 7.84385944  
Pd 7.64035222 7.35625700 6.17246666  
Pd 7.37859939 4.62611378 6.14350576  
Pd 4.62260879 4.91569057 6.17400648  
Pd 4.91286242 7.61257416 6.16394223  
Bi 6.14176290 6.12202580 4.45787274

**Pd<sub>5</sub>Bi<sub>2</sub>**

Pd 4.12588776 6.07282770 6.28224197  
Pd 8.52838694 4.72427576 6.61712495  
Pd 6.00475136 7.66118070 5.53179471  
Pd 8.43847672 7.51001343 6.67248872  
Pd 6.05814487 4.50344677 5.51754749  
Bi 7.83443389 6.13110862 4.51206766  
Bi 6.41663446 6.04469251 7.63283199

**Pd<sub>5</sub>Bi<sub>3</sub>**

Pd 6.47214900 5.71045867 4.40057697  
Pd 4.37089687 7.01519292 5.64757800  
Pd 6.16208347 6.78032554 7.61587739  
Pd 7.73416602 4.73144344 6.89034007  
Pd 8.76663116 7.19013688 7.04145695  
Bi 6.85579933 8.10922869 5.45046063  
Bi 5.17648346 4.62068800 6.40392320  
Bi 9.01957469 5.72674587 4.85695886

**Pd<sub>5</sub>Bi<sub>4</sub>**

Pd 8.58305967 6.18095196 4.85892708  
Pd 6.67710290 8.22052448 6.36619110  
Pd 4.23566984 7.09194378 6.32299228  
Pd 5.69020326 4.75596672 6.43062476  
Pd 8.50105409 6.24265896 7.97208198  
Bi 6.02700390 6.49018158 4.46155421  
Bi 9.24433488 8.15740248 6.39366847  
Bi 8.20978562 4.15384433 6.44845690  
Bi 5.93456532 6.59301371 8.30983101

**Pd<sub>5</sub>Bi<sub>5</sub>**

|    |            |            |            |
|----|------------|------------|------------|
| Pd | 6.76354040 | 6.27931357 | 4.58505074 |
| Pd | 4.49047225 | 5.51256417 | 6.00042530 |
| Pd | 9.01474004 | 5.51024791 | 6.02374315 |
| Pd | 6.75883982 | 8.61846685 | 6.01831676 |
| Pd | 6.74383308 | 6.26576614 | 7.45319505 |
| Bi | 6.74695329 | 4.08832013 | 6.00837839 |
| Bi | 4.57739246 | 7.76625823 | 7.50210479 |
| Bi | 4.59023801 | 7.76971916 | 4.52502350 |
| Bi | 8.93913905 | 7.76566570 | 4.52809164 |
| Bi | 8.91193512 | 7.75680466 | 7.51525568 |

**Pd<sub>5</sub>Bi<sub>6</sub>**

|    |             |            |            |
|----|-------------|------------|------------|
| Pd | 9.28400844  | 5.14663949 | 6.46464582 |
| Pd | 6.61285279  | 5.75217994 | 7.58377131 |
| Pd | 7.83841436  | 6.96977549 | 5.08124983 |
| Pd | 6.92363401  | 8.54738206 | 7.36102426 |
| Pd | 5.20259370  | 6.24188273 | 4.96553933 |
| Bi | 8.91040119  | 7.04249906 | 8.20466509 |
| Bi | 10.50391403 | 7.08267736 | 5.15212839 |
| Bi | 7.00630062  | 4.41003724 | 5.36186452 |
| Bi | 9.01439680  | 9.45803438 | 5.99879271 |
| Bi | 5.99712494  | 8.83294999 | 4.76207323 |
| Bi | 4.56922813  | 7.40554373 | 7.21672690 |

**Pd<sub>5</sub>Bi<sub>7</sub>**

|    |            |            |            |
|----|------------|------------|------------|
| Pd | 7.56281088 | 5.79423536 | 5.45908280 |
| Pd | 4.75398806 | 5.59594953 | 5.95615088 |
| Pd | 7.32544952 | 7.11873909 | 7.87689771 |
| Pd | 7.54694658 | 8.48549345 | 5.47557173 |
| Pd | 4.72269429 | 8.63362002 | 5.96672404 |
| Bi | 6.52395868 | 4.48076097 | 7.56365984 |
| Bi | 9.80315591 | 7.15104336 | 4.83346330 |
| Bi | 5.72572206 | 7.13514060 | 4.09235639 |
| Bi | 9.54882213 | 5.58017501 | 7.43372029 |
| Bi | 6.47940959 | 9.74325116 | 7.59610581 |
| Bi | 9.52813262 | 8.68007433 | 7.45391956 |
| Bi | 4.63962763 | 7.10024286 | 8.13153564 |

**Pd<sub>5</sub>Bi<sub>8</sub>**

|    |             |            |            |
|----|-------------|------------|------------|
| Pd | 8.61182254  | 7.29399500 | 5.31712704 |
| Pd | 5.72526726  | 7.98767038 | 6.60947747 |
| Pd | 6.90629507  | 5.01087756 | 6.69942152 |
| Pd | 8.61657011  | 7.28566378 | 7.97643544 |
| Pd | 4.44094145  | 5.74761382 | 6.65100443 |
| Bi | 7.18384434  | 9.57925437 | 5.02557372 |
| Bi | 6.15279391  | 6.37616933 | 4.51587749 |
| Bi | 9.04673089  | 4.62143796 | 8.25366315 |
| Bi | 6.12997492  | 6.47060843 | 8.79358016 |
| Bi | 7.15344455  | 9.55626353 | 8.26673843 |
| Bi | 9.70647514  | 9.47364670 | 6.65980996 |
| Bi | 10.87891137 | 6.38116250 | 6.63513587 |
| Bi | 8.99280765  | 4.62127106 | 5.05523583 |

**Pd<sub>5</sub>Bi<sub>9</sub>**

|    |             |            |            |
|----|-------------|------------|------------|
| Pd | 6.27286916  | 7.84845560 | 5.86740984 |
| Pd | 9.07136462  | 7.56283200 | 6.10223101 |
| Pd | 7.75323191  | 5.20770829 | 6.38333509 |
| Pd | 7.30610098  | 7.29408910 | 8.41881211 |
| Pd | 11.12385980 | 7.03323883 | 7.64458906 |
| Bi | 8.02613762  | 9.80650381 | 5.18000659 |
| Bi | 7.79392538  | 6.58639196 | 3.93266622 |
| Bi | 5.19268214  | 5.36067378 | 5.52769623 |
| Bi | 10.35741179 | 5.26024629 | 5.63433985 |
| Bi | 6.15111505  | 4.77035506 | 8.52806880 |
| Bi | 9.38325464  | 9.09692480 | 8.24582920 |
| Bi | 6.45125850  | 9.85437926 | 7.75143789 |
| Bi | 4.54589064  | 7.20380126 | 7.89748286 |
| Bi | 9.33539825  | 5.42127295 | 8.65329125 |

**Pd<sub>5</sub>Bi<sub>10</sub>**

|    |             |            |            |
|----|-------------|------------|------------|
| Pd | 6.53900044  | 7.30319016 | 8.52026954 |
| Pd | 6.13850777  | 6.94200418 | 5.75995701 |
| Pd | 9.26071917  | 5.65904450 | 6.50872153 |
| Pd | 8.51899600  | 8.21627737 | 6.11151066 |
| Pd | 9.13906239  | 7.56445988 | 8.73144965 |
| Bi | 4.56802062  | 8.61218062 | 7.26872476 |
| Bi | 4.85253308  | 5.43339659 | 7.63995991 |
| Bi | 7.46520434  | 9.78715495 | 8.21321617 |
| Bi | 6.46019623  | 9.60906022 | 5.15987110 |
| Bi | 7.94640931  | 5.01895736 | 8.80192565 |
| Bi | 8.18127957  | 6.56488100 | 4.00480559 |
| Bi | 11.11126657 | 7.13322198 | 5.23220645 |
| Bi | 10.68722486 | 9.26543390 | 7.34184516 |
| Bi | 11.35585220 | 6.27880092 | 8.17491370 |
| Bi | 7.03147906  | 4.29575266 | 5.82748561 |

**Pd<sub>5</sub>Bi<sub>11</sub>**

|    |             |             |            |
|----|-------------|-------------|------------|
| Pd | 7.94601917  | 8.61418222  | 8.39233308 |
| Pd | 5.32145192  | 7.75459577  | 7.56323119 |
| Pd | 9.52785093  | 7.14187774  | 6.58504414 |
| Pd | 7.03607962  | 5.71534470  | 6.76999248 |
| Pd | 7.18605915  | 8.51914440  | 5.65689223 |
| Bi | 6.74115171  | 6.30551424  | 9.43363709 |
| Bi | 10.49619382 | 9.44245217  | 7.58506217 |
| Bi | 7.72318475  | 10.91139967 | 6.89291401 |
| Bi | 5.69511685  | 10.02074199 | 8.97671001 |
| Bi | 9.35034180  | 4.54358966  | 7.23351637 |
| Bi | 8.39988418  | 6.06028601  | 4.41630021 |
| Bi | 4.53152884  | 5.15348722  | 7.44556475 |
| Bi | 9.63190800  | 8.95970602  | 4.62981610 |
| Bi | 4.86872154  | 9.90988497  | 6.01769034 |
| Bi | 5.08382259  | 6.73474797  | 4.96549880 |
| Bi | 9.89491711  | 6.84250860  | 9.24617302 |

**Pd<sub>5</sub>Bi<sub>12</sub>**

|    |             |             |            |
|----|-------------|-------------|------------|
| Pd | 7.63963240  | 6.10768790  | 6.62620362 |
| Pd | 10.92168602 | 6.95408061  | 6.49807732 |
| Pd | 8.26375344  | 8.78289593  | 5.64901168 |
| Pd | 6.42481351  | 7.96372470  | 8.13531773 |
| Pd | 9.19056121  | 8.28497227  | 8.31685483 |
| Bi | 6.21493386  | 10.26669914 | 6.63408111 |
| Bi | 11.74501655 | 9.17315833  | 7.79809021 |
| Bi | 5.87458580  | 7.33590993  | 4.98839547 |
| Bi | 9.83045480  | 4.55347468  | 7.01723937 |
| Bi | 7.50213364  | 9.97335514  | 9.50415575 |
| Bi | 3.87404785  | 8.11255923  | 7.17217753 |
| Bi | 8.12163427  | 5.94192520  | 9.32764321 |
| Bi | 5.13836164  | 5.49898707  | 7.45068582 |
| Bi | 11.17526012 | 6.41410007  | 9.13978992 |
| Bi | 9.18805156  | 10.90052868 | 7.11514734 |
| Bi | 9.24402833  | 6.45621896  | 4.42856854 |
| Bi | 10.92253365 | 9.04656915  | 4.84482644 |

**Pd<sub>5</sub>Bi<sub>13</sub>**

|    |             |             |            |
|----|-------------|-------------|------------|
| Pd | 5.83579303  | 8.94030739  | 7.01150693 |
| Pd | 7.84614227  | 7.19192895  | 7.96012734 |
| Pd | 10.71741850 | 7.27875722  | 6.84943971 |
| Pd | 8.85159214  | 9.48974787  | 6.72227696 |
| Pd | 7.38702708  | 6.78830333  | 5.26301216 |
| Bi | 4.69046510  | 6.81776517  | 5.80935835 |
| Bi | 9.73925267  | 5.37218459  | 8.56274133 |
| Bi | 5.29790504  | 6.98056818  | 8.80447430 |
| Bi | 6.72964666  | 9.34512847  | 4.51624371 |
| Bi | 6.70139925  | 4.82343622  | 7.03029952 |
| Bi | 9.57178091  | 5.17763893  | 5.48890820 |
| Bi | 9.99626635  | 8.38935685  | 9.25557902 |
| Bi | 6.91060562  | 11.46169338 | 6.64588307 |
| Bi | 12.96711387 | 7.71436144  | 5.29314629 |
| Bi | 9.65039889  | 8.15249814  | 4.43613805 |
| Bi | 11.60568114 | 9.97200656  | 6.74720086 |
| Bi | 7.23221677  | 9.90175745  | 9.11021480 |
| Bi | 13.09680772 | 7.77040657  | 8.21937440 |

**Pd<sub>5</sub>Bi<sub>14</sub>**

|    |             |             |            |
|----|-------------|-------------|------------|
| Pd | 11.16027962 | 6.79115291  | 7.28805992 |
| Pd | 9.58369923  | 8.26370870  | 5.53334215 |
| Pd | 9.75968895  | 9.09289326  | 8.20852500 |
| Pd | 6.76844976  | 8.62657295  | 6.94585183 |
| Pd | 8.22976101  | 6.48476625  | 7.98592626 |
| Bi | 12.32524610 | 8.71973042  | 5.75604084 |
| Bi | 7.84026651  | 10.98405417 | 7.97627413 |
| Bi | 12.45882451 | 8.76633267  | 8.72889776 |
| Bi | 10.30610534 | 5.59280268  | 5.03271629 |
| Bi | 10.37453238 | 10.95275087 | 6.18181984 |
| Bi | 7.75254749  | 10.21170773 | 4.88503581 |
| Bi | 7.47151217  | 8.50380511  | 9.73767414 |
| Bi | 10.07911858 | 4.42031646  | 7.96430891 |
| Bi | 4.39158849  | 7.63905361  | 5.94524264 |
| Bi | 7.32729645  | 7.11727459  | 4.57838069 |
| Bi | 5.49783427  | 6.21896258  | 8.31576934 |
| Bi | 10.31331181 | 6.91243162  | 9.89973288 |
| Bi | 7.61850359  | 4.54300593  | 6.15019340 |
| Bi | 4.52497726  | 9.07265663  | 8.53010094 |

**Pd<sub>5</sub>Bi<sub>15</sub>**

|    |             |             |            |
|----|-------------|-------------|------------|
| Pd | 5.57760006  | 8.53640777  | 7.10676656 |
| Pd | 7.56299483  | 7.17989067  | 5.59273443 |
| Pd | 7.49616366  | 6.77282694  | 8.38710745 |
| Pd | 10.59626255 | 7.70177299  | 6.90768328 |
| Pd | 8.37880131  | 9.41044406  | 7.59894701 |
| Bi | 4.85670104  | 6.75024334  | 5.23135895 |
| Bi | 9.61069565  | 5.14161729  | 8.10772472 |
| Bi | 4.75920535  | 6.37833272  | 8.43312079 |
| Bi | 6.16701360  | 9.47282845  | 4.61863138 |
| Bi | 6.73585842  | 4.75137146  | 6.73583296 |
| Bi | 9.72394354  | 5.57364436  | 5.16890227 |
| Bi | 9.68894246  | 7.94222281  | 9.62920184 |
| Bi | 6.18112030  | 11.14283269 | 7.34426427 |
| Bi | 12.93857587 | 9.18464004  | 6.21286499 |
| Bi | 9.32755021  | 9.10102962  | 4.77006398 |
| Bi | 10.84231575 | 10.42058884 | 8.13033955 |
| Bi | 6.48354891  | 8.99600152  | 9.65293622 |
| Bi | 8.95859897  | 11.76466419 | 6.20386664 |
| Bi | 12.81668912 | 7.21338275  | 8.47002383 |
| Bi | 12.70330411 | 6.27954945  | 5.64087491 |

**Pd<sub>6</sub>**

|    |            |            |            |
|----|------------|------------|------------|
| Pd | 4.49519234 | 5.44426548 | 6.52930104 |
| Pd | 7.78195383 | 6.83299846 | 5.86661158 |
| Pd | 5.68693849 | 6.37546487 | 4.45820433 |
| Pd | 6.59026906 | 5.90172540 | 7.93796861 |
| Pd | 6.76196547 | 4.47959849 | 5.81081724 |
| Pd | 5.51522981 | 7.79748129 | 6.58505819 |

**Pd<sub>6</sub>Bi**

|    |            |            |            |
|----|------------|------------|------------|
| Pd | 4.25460473 | 6.36266241 | 6.05386702 |
| Pd | 5.69233893 | 8.50122466 | 5.88460917 |
| Pd | 8.23784171 | 7.86182180 | 5.99686838 |
| Pd | 6.49372668 | 6.51866364 | 7.35208595 |
| Pd | 8.37544981 | 5.27327195 | 6.02416535 |
| Pd | 5.91319576 | 4.38119013 | 5.90569199 |
| Bi | 6.53816588 | 6.46541895 | 4.44835783 |

**Pd<sub>6</sub>Bi<sub>2</sub>**

|    |            |            |            |
|----|------------|------------|------------|
| Pd | 4.47875968 | 6.22497119 | 4.92992806 |
| Pd | 4.54994481 | 6.27398622 | 7.50153102 |
| Pd | 6.05168488 | 7.99908773 | 6.14645906 |
| Pd | 8.67009062 | 7.60447987 | 6.14200676 |
| Pd | 8.67405706 | 4.89862776 | 6.18892912 |
| Pd | 6.05650786 | 4.50004469 | 6.20932316 |
| Bi | 7.14922992 | 6.28286168 | 7.89377925 |
| Bi | 7.07992918 | 6.21852086 | 4.45811957 |

**Pd<sub>6</sub>Bi<sub>3</sub>**

|    |            |            |            |
|----|------------|------------|------------|
| Pd | 9.18578044 | 8.03863058 | 6.25419958 |
| Pd | 5.53082322 | 6.24488371 | 4.53388150 |
| Pd | 6.81177601 | 7.45525959 | 7.53278980 |
| Pd | 8.17797430 | 6.25219146 | 4.53420440 |
| Pd | 6.85926075 | 4.17733540 | 5.59713298 |
| Pd | 4.46974719 | 8.02607454 | 6.22608332 |
| Bi | 6.84332765 | 8.50350973 | 5.04825001 |
| Bi | 5.10428116 | 5.53067744 | 7.03034470 |
| Bi | 8.56118927 | 5.56211405 | 7.05986020 |

**Pd<sub>6</sub>Bi<sub>4</sub>**

|    |             |            |            |
|----|-------------|------------|------------|
| Pd | 8.60545257  | 6.09246551 | 4.99501669 |
| Pd | 6.66160291  | 5.00479850 | 6.87099600 |
| Pd | 8.59639211  | 6.86419423 | 7.95164728 |
| Pd | 6.64613606  | 7.96250836 | 6.09501785 |
| Pd | 4.40586908  | 6.47621601 | 6.47931969 |
| Pd | 10.84272991 | 6.50259391 | 6.49478145 |
| Bi | 6.05859432  | 7.01719644 | 8.49812263 |
| Bi | 9.18373556  | 8.50369630 | 5.94576586 |
| Bi | 6.06185852  | 5.95429925 | 4.46834484 |
| Bi | 9.20411397  | 4.46447946 | 7.00302362 |

**Pd<sub>6</sub>Bi<sub>5</sub>**

|    |             |            |            |
|----|-------------|------------|------------|
| Pd | 9.42345918  | 8.00280196 | 5.74466324 |
| Pd | 9.41679174  | 4.98795609 | 5.71769281 |
| Pd | 9.42795176  | 6.46728274 | 8.11922555 |
| Pd | 6.44957422  | 8.02358711 | 5.75748139 |
| Pd | 6.44095417  | 4.97097247 | 5.72924222 |
| Pd | 6.46227410  | 6.47212223 | 8.12788434 |
| Bi | 7.91656994  | 6.50865843 | 4.19574676 |
| Bi | 11.42561227 | 6.48683532 | 6.44372329 |
| Bi | 7.94925627  | 8.62608402 | 7.84227503 |
| Bi | 7.94028697  | 4.31838101 | 7.80039369 |
| Bi | 4.45900977  | 6.49506115 | 6.46029533 |

**Pd<sub>6</sub>Bi<sub>6</sub>**

|    |            |            |            |
|----|------------|------------|------------|
| Pd | 7.28884314 | 7.53396970 | 4.92533428 |
| Pd | 9.86115385 | 6.75254276 | 7.37952928 |
| Pd | 5.88876865 | 4.88068401 | 6.89201070 |
| Pd | 7.12096231 | 7.16115315 | 7.69850493 |
| Pd | 4.48441457 | 7.01917721 | 5.39654225 |
| Pd | 8.41041352 | 5.08101361 | 5.44278732 |
| Bi | 8.70396803 | 9.14110768 | 6.92802837 |
| Bi | 8.30035033 | 4.79491895 | 8.05280121 |
| Bi | 5.67573663 | 9.22035007 | 6.23123469 |
| Bi | 6.01652468 | 5.28348599 | 4.28709150 |
| Bi | 4.49436678 | 6.84077404 | 7.99717786 |
| Bi | 9.92089587 | 7.15041231 | 4.80909428 |

|                                      |             |             |                                      |             |             |             |
|--------------------------------------|-------------|-------------|--------------------------------------|-------------|-------------|-------------|
| <b>Pd<sub>6</sub>Bi<sub>7</sub></b>  |             |             | Pd                                   | 9.05725395  | 7.16163577  | 6.04920225  |
| Pd                                   | 9.55383005  | 6.70716940  | Bi                                   | 11.69633139 | 7.12176857  | 5.37707998  |
| Pd                                   | 6.99861432  | 6.54163690  | Bi                                   | 9.25354087  | 9.80839449  | 5.49709921  |
| Pd                                   | 5.75851882  | 4.72721960  | Bi                                   | 8.60255181  | 9.91569494  | 8.53725704  |
| Pd                                   | 7.17867365  | 6.98372661  | Bi                                   | 12.95687917 | 7.20356035  | 8.13615580  |
| Pd                                   | 4.48276203  | 7.05858710  | Bi                                   | 10.39074317 | 7.28719369  | 9.89308916  |
| Pd                                   | 5.82205844  | 8.87451812  | Bi                                   | 5.61111030  | 8.76980444  | 8.90647431  |
| Bi                                   | 8.28348626  | 8.81242795  | Bi                                   | 5.59684177  | 5.72273362  | 8.99460958  |
| Bi                                   | 4.45855779  | 6.69929804  | Bi                                   | 4.72579063  | 7.17646907  | 6.37334870  |
| Bi                                   | 8.22564010  | 4.45922181  | Bi                                   | 8.58554991  | 4.53083255  | 8.68580175  |
| Bi                                   | 9.20037247  | 8.62940507  | Bi                                   | 7.09825275  | 7.10017324  | 4.31524047  |
| Bi                                   | 5.99789675  | 9.12693833  | Bi                                   | 9.24773031  | 4.49162718  | 5.64507690  |
| Bi                                   | 5.97951219  | 5.18916660  | <b>Pd<sub>6</sub>Bi<sub>12</sub></b> |             |             |             |
| Bi                                   | 9.21160514  | 5.63798550  | Pd                                   | 6.28440048  | 9.31934869  | 7.05001142  |
| <b>Pd<sub>6</sub>Bi<sub>8</sub></b>  |             |             | Pd                                   | 7.13840280  | 7.12100781  | 8.66123782  |
| Pd                                   | 6.61119207  | 8.62170519  | Pd                                   | 6.93505702  | 6.66188554  | 5.93358273  |
| Pd                                   | 9.27420354  | 7.55207773  | Pd                                   | 9.65556041  | 8.40841055  | 5.81945890  |
| Pd                                   | 7.26977534  | 6.06007034  | Pd                                   | 10.37618055 | 6.01258156  | 7.32806672  |
| Pd                                   | 6.73497188  | 7.15745958  | Pd                                   | 9.56910931  | 8.49085333  | 8.58142659  |
| Pd                                   | 6.86944143  | 4.56147098  | Bi                                   | 8.56228957  | 10.70902590 | 6.89134651  |
| Pd                                   | 4.13345519  | 8.11943751  | Bi                                   | 7.33064033  | 8.92919222  | 4.50893557  |
| Bi                                   | 9.01499154  | 7.74042811  | Bi                                   | 7.36058429  | 9.66667973  | 9.58806950  |
| Bi                                   | 9.54462254  | 4.96082257  | Bi                                   | 4.47463970  | 7.86613943  | 5.71250228  |
| Bi                                   | 8.44626537  | 8.89448799  | Bi                                   | 5.07731596  | 5.58119603  | 7.68517882  |
| Bi                                   | 8.75918473  | 10.12335370 | Bi                                   | 4.57219904  | 8.31328900  | 8.87414998  |
| Bi                                   | 8.70168424  | 5.67149242  | Bi                                   | 9.28539116  | 5.93816663  | 4.76923248  |
| Bi                                   | 5.91296766  | 9.83517994  | Bi                                   | 8.09279564  | 4.61673380  | 7.39950655  |
| Bi                                   | 4.52067117  | 5.64435498  | Bi                                   | 12.13689520 | 7.23814071  | 5.71637605  |
| Bi                                   | 4.78213894  | 6.69599245  | Bi                                   | 9.32644335  | 6.12790320  | 9.88360754  |
| <b>Pd<sub>6</sub>Bi<sub>9</sub></b>  |             |             | Bi                                   | 11.58239907 | 9.81925488  | 7.26736318  |
| Pd                                   | 6.91161180  | 7.27384010  | Bi                                   | 12.12600346 | 7.32669263  | 8.90638786  |
| Pd                                   | 5.93062182  | 8.60567468  | <b>Pd<sub>6</sub>Bi<sub>13</sub></b> |             |             |             |
| Pd                                   | 7.87791418  | 6.61754765  | Pd                                   | 6.40431028  | 6.88211389  | 6.55302892  |
| Pd                                   | 6.30538030  | 4.92572633  | Pd                                   | 6.91897254  | 8.58226558  | 8.69909338  |
| Pd                                   | 8.10793237  | 9.73560557  | Pd                                   | 9.98483339  | 8.59520617  | 8.70232313  |
| Pd                                   | 9.87564586  | 6.62195298  | Pd                                   | 8.45244395  | 8.88093878  | 6.28914636  |
| Bi                                   | 8.23943988  | 5.37914096  | Pd                                   | 10.48762780 | 6.88909622  | 6.56247893  |
| Bi                                   | 5.70636104  | 9.63953156  | Pd                                   | 8.45428668  | 5.96403011  | 8.48156371  |
| Bi                                   | 8.27723455  | 8.97200044  | Bi                                   | 6.15946405  | 8.93380281  | 4.82674230  |
| Bi                                   | 8.91169598  | 4.21556673  | Bi                                   | 4.47318142  | 8.61798410  | 7.39204630  |
| Bi                                   | 4.28017705  | 6.99573726  | Bi                                   | 6.61908114  | 10.80236839 | 7.20463106  |
| Bi                                   | 9.03958189  | 8.53639614  | Bi                                   | 5.77555099  | 6.12010854  | 9.16245789  |
| Bi                                   | 10.69089336 | 8.99626610  | Bi                                   | 8.44248645  | 10.40781999 | 9.96502095  |
| Bi                                   | 10.40486414 | 6.42919433  | Bi                                   | 8.45359354  | 7.48056195  | 10.75596588 |
| Bi                                   | 5.51765079  | 6.09867825  | Bi                                   | 10.29307624 | 10.80792322 | 7.20442172  |
| <b>Pd<sub>6</sub>Bi<sub>10</sub></b> |             |             | Bi                                   | 6.90899814  | 4.26367670  | 6.98550147  |
| Pd                                   | 6.74601842  | 9.06248569  | Bi                                   | 10.02604965 | 4.26864192  | 6.99258898  |
| Pd                                   | 9.85887147  | 6.32021884  | Bi                                   | 8.45107458  | 6.22242300  | 4.89298209  |
| Pd                                   | 10.56024645 | 8.80732302  | Bi                                   | 10.74309085 | 8.93009441  | 4.82524705  |
| Pd                                   | 7.43935213  | 7.80109908  | Bi                                   | 12.42910299 | 8.62710768  | 7.38316448  |
| Pd                                   | 6.37740002  | 5.83040019  | Bi                                   | 11.12756180 | 6.12865802  | 9.17078645  |
| Pd                                   | 8.65481494  | 7.17870754  | <b>Pd<sub>6</sub>Bi<sub>14</sub></b> |             |             |             |
| Bi                                   | 6.91534306  | 6.91420727  | Pd                                   | 10.92567733 | 6.71054838  | 8.02244803  |
| Bi                                   | 9.26293339  | 9.56074120  | Pd                                   | 8.77949128  | 8.27355940  | 8.88269999  |
| Bi                                   | 8.77830913  | 4.48209284  | Pd                                   | 6.53222555  | 6.74186378  | 8.20433366  |
| Bi                                   | 7.68095335  | 5.00628947  | Pd                                   | 10.19544577 | 8.86684922  | 6.37533429  |
| Bi                                   | 9.77747937  | 8.39742942  | Pd                                   | 7.25202049  | 8.78476059  | 6.43406369  |
| Bi                                   | 11.28083199 | 6.61001470  | Pd                                   | 8.67904095  | 6.27451363  | 6.42733038  |
| Bi                                   | 4.92098372  | 6.57203378  | Bi                                   | 11.88385386 | 10.83114214 | 7.21131469  |
| Bi                                   | 4.44114630  | 7.61864059  | Bi                                   | 12.97389547 | 8.08502046  | 6.92742233  |
| Bi                                   | 5.31939744  | 9.51902225  | Bi                                   | 6.29452575  | 9.13755564  | 9.51999027  |
| Bi                                   | 8.37120642  | 10.41700809 | Bi                                   | 5.87485807  | 11.01178128 | 7.10071868  |
| <b>Pd<sub>6</sub>Bi<sub>11</sub></b> |             |             | Bi                                   | 4.53292144  | 8.29222881  | 7.11478956  |
| Pd                                   | 10.74573746 | 5.76198216  | Bi                                   | 7.10438683  | 4.17707503  | 7.41670934  |
| Pd                                   | 7.90148536  | 7.23876606  | Bi                                   | 11.34324720 | 8.90410920  | 9.52847885  |
| Pd                                   | 10.76810296 | 8.64698010  | Bi                                   | 8.78228836  | 5.66001575  | 9.56918083  |
| Pd                                   | 6.94499492  | 8.76377617  | Bi                                   | 10.24719185 | 4.16409790  | 7.27446103  |
| Pd                                   | 6.94064559  | 5.59060070  | Bi                                   | 8.61963785  | 10.61802076 | 4.99089147  |
|                                      |             |             | Bi                                   | 6.11783737  | 6.28238190  | 5.41313315  |
|                                      |             |             | Bi                                   | 11.16517776 | 6.29285191  | 5.20585375  |
|                                      |             |             | Bi                                   | 8.62904305  | 7.76278396  | 4.10610898  |

Bi 8.88504628 10.80966602 8.14881265

**Pd<sub>6</sub>Bi<sub>15</sub>**

Pd 8.52394821 6.25758345 6.24218191  
Pd 7.25918707 8.85757127 6.35874004  
Pd 7.22691509 7.13393685 8.66436142  
Pd 10.09030223 7.83973886 7.77630799  
Pd 10.05143760 10.21189338 6.38614891  
Pd 8.31224138 9.93797901 8.80520063  
Bi 11.23762644 5.82425215 6.07400794  
Bi 4.50258070 6.99532858 8.64844085  
Bi 9.38016711 8.27151034 4.61004205  
Bi 6.32124286 6.74957395 4.73528682  
Bi 6.32503658 4.93015994 7.20662145  
Bi 9.29670512 5.26625139 8.65047169  
Bi 6.14523078 9.05920291 10.28216684  
Bi 12.37778473 6.82663570 8.72971876  
Bi 9.12261520 7.93520317 10.45392812  
Bi 12.33419903 8.68167666 6.27225904  
Bi 7.87948673 11.21454243 5.14003094  
Bi 9.03760199 12.35272989 7.73176301  
Bi 6.04937595 10.99590211 7.75346479  
Bi 11.05507230 10.17666468 8.93779791  
Bi 4.51183740 8.71687217 6.18906888

**Pd<sub>7</sub>**

Pd 8.55902543 6.63121760 5.78924343  
Pd 7.22435216 4.43980277 5.76029432  
Pd 4.71263606 5.03179195 5.77741588  
Pd 4.51306268 7.58887673 5.79958819  
Pd 6.88348925 8.56351948 5.82745997  
Pd 6.37568375 6.49872736 4.37394573  
Pd 6.37905143 6.38093820 7.21702899

**Pd<sub>7</sub>Bi**

Pd 4.49837598 4.96681929 5.97183970  
Pd 7.11677538 4.46628199 6.07641228  
Pd 6.01790716 6.15093385 7.64459950  
Pd 8.54081321 6.23377391 7.44135382  
Pd 4.59295634 7.62333382 6.11947229  
Pd 7.18920583 8.01833841 6.07369974  
Pd 8.79106480 6.21600195 4.90673694  
Bi 6.17979730 6.28084525 4.42127789

**Pd<sub>7</sub>Bi<sub>2</sub>**

Pd 6.72408231 6.47991414 7.07820019  
Pd 4.54548023 5.16982465 6.57832610  
Pd 4.52087048 7.76864404 6.57134577  
Pd 8.90205268 5.17040789 6.57109940  
Pd 8.91574866 7.77533187 6.57378595  
Pd 5.32035834 6.49395081 4.39666061  
Pd 8.11568285 6.49163081 4.39368077  
Bi 6.71886735 4.43742915 5.29599755  
Bi 6.71960659 8.53699312 5.33335114

**Pd<sub>7</sub>Bi<sub>3</sub>**

Pd 8.42798936 7.87982981 7.66927309  
Pd 8.43944047 4.89365737 7.73774020  
Pd 8.37786704 4.84665853 5.06261230  
Pd 6.15747452 4.43197409 6.43983692  
Pd 8.36077060 7.78349552 4.99587983  
Pd 4.33944635 6.34678632 6.41995238  
Pd 6.14647561 8.26554793 6.35601318  
Bi 10.09258721 6.35921860 6.33379453  
Bi 6.34388695 6.38928973 8.24702174  
Bi 6.25109647 6.29833980 4.51127859

**Pd<sub>7</sub>Bi<sub>4</sub>**

Pd 4.44981942 7.15871007 6.11474804  
Pd 6.77995462 8.18823428 7.06400116  
Pd 10.87619189 7.15130105 5.82265271  
Pd 8.56422016 8.23039285 4.89986794  
Pd 6.58015649 6.16700075 4.80138803  
Pd 7.64291089 3.94597106 5.93658840  
Pd 8.75564931 6.10976296 7.14208037  
Bi 6.19063060 5.61531038 7.44399384  
Bi 5.99958465 8.72653617 4.59476537  
Bi 9.33815245 8.66371756 7.39649177  
Bi 9.12573952 5.64530386 4.47650587

**Pd<sub>7</sub>Bi<sub>5</sub>**

Pd 9.12880771 6.84816820 8.12053585  
Pd 9.14255575 6.93458508 5.10173581  
Pd 8.38867371 4.61047048 6.59123508  
Pd 6.42306249 7.82977423 5.22897355  
Pd 6.38415647 7.76690119 8.02784654  
Pd 5.54848763 5.41030308 6.60115899  
Pd 10.92953597 8.19679763 6.66094062  
Bi 8.34027500 8.97756966 6.68519465  
Bi 7.09177526 5.41294740 4.45736981  
Bi 4.22276818 7.65856466 6.59024269  
Bi 7.07358483 5.34058434 8.75606295  
Bi 10.85039901 5.55096205 6.56998469

**Pd<sub>7</sub>Bi<sub>6</sub>**

Pd 7.86908426 7.92579690 4.42284748  
Pd 7.84153557 4.03187230 6.90532184  
Pd 6.49871410 5.97071214 8.24332246  
Pd 6.43677466 5.84708951 5.42693324  
Pd 6.52053099 8.32820142 6.74796044  
Pd 7.95901649 8.13432281 9.03602317  
Pd 4.28561786 6.75287224 6.85161125  
Bi 9.08049086 5.67171133 5.20435962  
Bi 9.13740631 5.81360615 8.43674045  
Bi 5.09645131 4.15848882 6.93647833  
Bi 9.16577382 8.54774972 6.68152320  
Bi 5.11514556 7.96260981 4.56101680  
Bi 5.20328747 8.12115233 9.01998894

**Pd<sub>7</sub>Bi<sub>7</sub>**

Pd 4.83402832 7.20244033 7.86775565  
Pd 5.58254477 9.33116380 6.03445535  
Pd 6.93805600 6.98867103 5.80692531  
Pd 8.41513607 8.88009418 7.12672650  
Pd 7.40332028 7.06415529 9.01556211  
Pd 8.14371915 4.98602562 7.23712185  
Pd 5.22853177 4.86535732 6.20197970  
Bi 6.22319342 9.35554973 8.56489138  
Bi 9.85683572 6.85494084 8.21972694  
Bi 5.92337191 4.93253074 8.71079314  
Bi 7.34570354 4.61726552 4.67194924  
Bi 9.61223607 6.69849249 5.23521676  
Bi 7.74942455 9.17471545 4.53986378  
Bi 4.21058950 7.15291167 5.30672928

**Pd<sub>7</sub>Bi<sub>8</sub>**

Pd 10.02094226 6.00463791 7.02149679  
Pd 10.36981015 8.75909448 6.03969661  
Pd 8.13213852 9.41291425 7.85863078  
Pd 8.12168182 6.76188769 8.84110016  
Pd 5.76277782 8.97166600 6.14832006  
Pd 7.92302007 7.28854725 5.76678622  
Pd 6.11254822 5.76165348 7.06144763  
Bi 8.21417382 4.26373752 8.11339265  
Bi 3.75095224 7.15538563 6.84919291  
Bi 8.10464300 4.57682532 5.20137145  
Bi 10.36381933 8.12316297 8.55556878  
Bi 8.11814957 9.93545689 5.29041431  
Bi 10.20200501 6.70712125 4.43558685

|    |            |            |            |
|----|------------|------------|------------|
| Bi | 5.92281824 | 8.14509564 | 8.67008113 |
| Bi | 5.58476494 | 6.85392374 | 4.52590117 |

**Pd<sub>7</sub>Bi<sub>9</sub>**

|    |             |             |            |
|----|-------------|-------------|------------|
| Pd | 8.50144702  | 7.54243022  | 6.13105913 |
| Pd | 6.05573149  | 8.76330968  | 6.88827253 |
| Pd | 6.73504320  | 5.58332469  | 5.87409606 |
| Pd | 9.64706526  | 8.57160481  | 8.40522920 |
| Pd | 7.38676826  | 7.12015198  | 8.66466431 |
| Pd | 8.45661285  | 4.72588450  | 7.88828168 |
| Pd | 10.85329929 | 6.24591516  | 7.32118481 |
| Bi | 8.30765426  | 10.27919552 | 6.34945243 |
| Bi | 4.31565118  | 6.81276913  | 6.08793559 |
| Bi | 6.62503965  | 7.96043322  | 4.34343469 |
| Bi | 7.29658530  | 9.75438387  | 9.18385257 |
| Bi | 4.71831659  | 7.75296066  | 9.02256217 |
| Bi | 10.98658542 | 8.55431543  | 6.08492865 |
| Bi | 9.70401635  | 6.22303173  | 9.68232477 |
| Bi | 9.40826679  | 5.10833775  | 5.45021905 |
| Bi | 5.75786108  | 4.94079164  | 8.27396481 |

**Pd<sub>7</sub>Bi<sub>10</sub>**

|    |             |            |            |
|----|-------------|------------|------------|
| Pd | 7.42463028  | 6.85376682 | 8.34817887 |
| Pd | 7.19704470  | 4.54050427 | 6.84177086 |
| Pd | 5.91033881  | 6.81162357 | 5.67956041 |
| Pd | 8.59991648  | 6.80527341 | 5.86359583 |
| Pd | 7.20192195  | 9.11109329 | 6.77023494 |
| Pd | 4.47042905  | 6.84043830 | 7.88001368 |
| Pd | 10.14026848 | 6.84819506 | 7.96900353 |
| Bi | 7.39149410  | 5.05377510 | 4.17175385 |
| Bi | 5.73847035  | 8.90816115 | 9.10534077 |
| Bi | 5.74146949  | 4.82410398 | 9.17048531 |
| Bi | 4.51816786  | 8.99644892 | 6.21772310 |
| Bi | 4.52113789  | 4.64000383 | 6.27169321 |
| Bi | 9.87753758  | 4.50932701 | 6.22576478 |
| Bi | 8.86256003  | 4.65326407 | 9.06541212 |
| Bi | 9.88915562  | 9.10729685 | 6.17152894 |
| Bi | 8.85887662  | 9.07476762 | 9.00696664 |
| Bi | 7.40769822  | 8.50022111 | 4.11785367 |

**Pd<sub>7</sub>Bi<sub>11</sub>**

|    |             |             |             |
|----|-------------|-------------|-------------|
| Pd | 10.05500560 | 7.73731829  | 8.47399639  |
| Pd | 9.22939512  | 8.80891126  | 6.13586512  |
| Pd | 6.98205484  | 7.51655493  | 5.71188684  |
| Pd | 8.62669051  | 5.38262960  | 6.85226571  |
| Pd | 5.03310268  | 6.50301004  | 7.18436801  |
| Pd | 7.09121654  | 9.69130215  | 7.65265269  |
| Pd | 7.32434479  | 7.11342577  | 8.49850632  |
| Bi | 11.82541836 | 8.40183693  | 6.50100506  |
| Bi | 9.73737437  | 10.54472170 | 8.08132991  |
| Bi | 7.34089609  | 10.19923405 | 4.96772767  |
| Bi | 11.27720647 | 5.55421397  | 7.22106039  |
| Bi | 9.60900162  | 6.59692595  | 4.67794488  |
| Bi | 6.44025197  | 5.00139457  | 5.23070906  |
| Bi | 9.08773967  | 5.43772632  | 9.61305549  |
| Bi | 5.11531444  | 8.45485568  | 9.15508238  |
| Bi | 4.79484722  | 9.09519139  | 6.18301410  |
| Bi | 6.43353852  | 4.43634819  | 8.22226926  |
| Bi | 8.19962519  | 9.04516916  | 10.16348470 |

**Pd<sub>7</sub>Bi<sub>12</sub>**

|    |             |             |             |
|----|-------------|-------------|-------------|
| Pd | 10.47965505 | 7.47828918  | 8.66350194  |
| Pd | 9.53487594  | 9.55109971  | 6.46146203  |
| Pd | 8.03228537  | 8.78702891  | 8.55388248  |
| Pd | 6.97260158  | 6.31541333  | 8.93044298  |
| Pd | 9.57865944  | 5.27639979  | 6.32919972  |
| Pd | 7.83947500  | 7.25097045  | 6.21042169  |
| Pd | 5.72823889  | 8.79269040  | 7.04547761  |
| Bi | 12.14835022 | 8.88069663  | 6.95659173  |
| Bi | 10.23113837 | 10.22687276 | 9.03021772  |
| Bi | 7.30607455  | 11.08975110 | 7.41680251  |
| Bi | 5.69044174  | 8.67228021  | 9.80186470  |
| Bi | 8.69728575  | 7.44505671  | 10.77449311 |
| Bi | 9.36951964  | 4.96767223  | 8.98875057  |
| Bi | 12.00381311 | 5.82269507  | 7.16189887  |
| Bi | 6.87274593  | 4.70681417  | 6.73882953  |
| Bi | 4.47995181  | 6.49541490  | 7.90942629  |
| Bi | 7.33083476  | 9.54456368  | 4.81866182  |
| Bi | 10.24811633 | 7.49229715  | 4.87338951  |
| Bi | 5.42905440  | 6.96043944  | 5.03894487  |

**Pd<sub>7</sub>Bi<sub>13</sub>**

|    |             |             |             |
|----|-------------|-------------|-------------|
| Pd | 9.01342999  | 9.00869911  | 9.47447048  |
| Pd | 10.55856205 | 6.38095841  | 7.72632213  |
| Pd | 7.93478445  | 6.70812166  | 8.61846371  |
| Pd | 8.96522428  | 7.68746534  | 6.01633371  |
| Pd | 7.38856123  | 9.64957393  | 6.91820797  |
| Pd | 5.58496275  | 8.07353600  | 8.45947656  |
| Pd | 7.02478585  | 5.82152451  | 6.29821854  |
| Bi | 8.80516636  | 4.23324789  | 7.89829121  |
| Bi | 11.62527388 | 8.05333517  | 5.79477938  |
| Bi | 6.91129378  | 7.89238168  | 10.86736113 |
| Bi | 11.63948068 | 8.67890774  | 8.83767556  |
| Bi | 9.96210357  | 6.54015463  | 10.36596221 |
| Bi | 9.61850997  | 11.05556100 | 7.89328886  |
| Bi | 9.74906645  | 5.28132727  | 5.27852452  |
| Bi | 6.68693992  | 8.08426623  | 4.63755846  |
| Bi | 9.36770711  | 10.14125186 | 5.01995882  |
| Bi | 4.73675969  | 9.71737656  | 6.49961233  |
| Bi | 6.65943555  | 10.53320082 | 9.33351295  |
| Bi | 4.43666327  | 6.66008442  | 6.38871426  |
| Bi | 5.69476917  | 5.30964575  | 8.80172209  |

**Pd<sub>7</sub>Bi<sub>14</sub>**

|    |             |             |            |
|----|-------------|-------------|------------|
| Pd | 11.23891324 | 8.44634479  | 6.88803814 |
| Pd | 8.79987888  | 7.51906063  | 8.39876597 |
| Pd | 8.85419314  | 10.09454645 | 6.87792304 |
| Pd | 7.04095276  | 5.77555038  | 6.89058412 |
| Pd | 6.36098541  | 8.50469125  | 6.87091816 |
| Pd | 10.53791761 | 5.72204271  | 6.88799685 |
| Pd | 8.80164004  | 7.49149512  | 5.36469052 |
| Bi | 13.13573841 | 6.50547428  | 6.87329900 |
| Bi | 10.41324490 | 9.66409692  | 4.52274273 |
| Bi | 11.30169870 | 6.64865568  | 9.29373889 |
| Bi | 7.23499768  | 9.74051861  | 9.21700176 |
| Bi | 6.34249320  | 11.27335412 | 6.85968834 |
| Bi | 11.43177818 | 11.16964789 | 6.86377567 |
| Bi | 10.42178654 | 9.70389988  | 9.23197486 |
| Bi | 6.25779888  | 6.73870403  | 9.28267421 |
| Bi | 7.23709346  | 9.71732363  | 4.52110505 |
| Bi | 6.24145529  | 6.72111268  | 4.49649853 |
| Bi | 8.76618784  | 4.64235222  | 5.18369218 |
| Bi | 11.29740146 | 6.60864980  | 4.46737805 |
| Bi | 8.77606796  | 4.66642131  | 8.61235282 |
| Bi | 4.42992324  | 6.54064137  | 6.89658437 |



**Pd<sub>7</sub>Bi<sub>15</sub>**

|    |             |             |            |
|----|-------------|-------------|------------|
| Pd | 11.64359865 | 8.76551593  | 7.29367648 |
| Pd | 9.11854448  | 7.58857191  | 8.66188848 |
| Pd | 9.03554257  | 10.03934502 | 6.99041499 |
| Pd | 7.71647440  | 5.49983394  | 7.10783793 |
| Pd | 6.85924156  | 8.13752976  | 6.81956203 |
| Pd | 11.26893801 | 6.01274847  | 7.41500684 |
| Pd | 9.46568296  | 7.42462584  | 5.65933062 |
| Bi | 13.78893043 | 7.07876701  | 7.55163768 |
| Bi | 10.83112335 | 9.78664914  | 4.75814819 |
| Bi | 11.70452115 | 7.19561333  | 9.77500186 |
| Bi | 7.34039864  | 9.70424421  | 9.28031979 |
| Bi | 6.30946957  | 10.81657724 | 6.61334193 |
| Bi | 11.42376605 | 11.47719871 | 7.11208886 |
| Bi | 10.42745285 | 10.03480623 | 9.49282325 |
| Bi | 6.64283789  | 6.52330722  | 9.38043844 |
| Bi | 7.78372863  | 9.35788281  | 4.42046420 |
| Bi | 7.20440251  | 6.31427166  | 4.51850749 |
| Bi | 9.78776666  | 4.59586116  | 5.67142501 |
| Bi | 12.13201274 | 6.91254369  | 5.02993564 |
| Bi | 9.49081032  | 4.78806080  | 8.98646186 |
| Bi | 5.04667941  | 6.00989013  | 6.72813130 |
| Bi | 4.54552930  | 8.69284819  | 8.17536476 |

**Pd<sub>8</sub>**

|    |            |            |            |
|----|------------|------------|------------|
| Pd | 5.85783644 | 6.03592493 | 7.70528183 |
| Pd | 8.41799365 | 6.04025211 | 7.35234821 |
| Pd | 4.39271698 | 4.76293280 | 6.02515186 |
| Pd | 6.95967009 | 4.39134041 | 6.01539048 |
| Pd | 6.95695173 | 7.73059327 | 6.06862446 |
| Pd | 8.44461307 | 6.08173005 | 4.76736167 |
| Pd | 4.38783162 | 7.35376462 | 6.06374982 |
| Pd | 5.87222324 | 6.08730569 | 4.38562777 |

**Pd<sub>8</sub>Bi**

|    |            |            |            |
|----|------------|------------|------------|
| Pd | 8.88893597 | 7.78570367 | 5.10052303 |
| Pd | 6.61995525 | 4.42973138 | 6.30178921 |
| Pd | 8.91231434 | 5.23512880 | 5.14270322 |
| Pd | 6.65321011 | 8.57388023 | 6.35704062 |
| Pd | 6.71814704 | 6.50184485 | 4.67694822 |
| Pd | 4.50117451 | 5.26910193 | 5.02731028 |
| Pd | 4.54790458 | 7.78690119 | 5.03404289 |
| Pd | 5.21302833 | 6.50542440 | 7.21276534 |
| Bi | 7.92402538 | 6.48665457 | 7.29271069 |

**Pd<sub>8</sub>Bi<sub>2</sub>**

|    |            |            |            |
|----|------------|------------|------------|
| Pd | 5.30045749 | 7.48201669 | 7.07364186 |
| Pd | 4.50080098 | 7.11007025 | 4.59485575 |
| Pd | 6.80529474 | 9.56106067 | 7.34415426 |
| Pd | 8.88262355 | 6.99692370 | 4.58726765 |
| Pd | 6.65368631 | 5.75787490 | 5.06883193 |
| Pd | 8.13917584 | 7.37840128 | 7.07364186 |
| Pd | 4.45353632 | 5.11492488 | 6.30025259 |
| Pd | 8.81986733 | 4.97066235 | 6.25942076 |
| Bi | 6.73611160 | 8.48657751 | 4.96078069 |
| Bi | 6.65553405 | 5.31850141 | 7.73480764 |

**Pd<sub>8</sub>Bi<sub>3</sub>**

|    |             |            |            |
|----|-------------|------------|------------|
| Pd | 8.83525363  | 5.84952147 | 4.80848350 |
| Pd | 7.79867481  | 8.11510184 | 7.93849143 |
| Pd | 7.80743613  | 8.27016666 | 5.00605637 |
| Pd | 8.83417180  | 5.68268546 | 7.90051433 |
| Pd | 10.81781158 | 5.24218211 | 6.31763277 |
| Pd | 6.24127721  | 6.22262441 | 4.43043638 |
| Pd | 6.23114455  | 6.02371447 | 8.30124044 |
| Pd | 4.55616238  | 5.46342117 | 6.33133467 |
| Bi | 9.92741734  | 7.70265833 | 6.45650331 |
| Bi | 7.12655179  | 4.51689850 | 6.28817306 |
| Bi | 5.62803029  | 7.89958059 | 6.45451124 |

**Pd<sub>8</sub>Bi<sub>4</sub>**

|    |             |             |            |
|----|-------------|-------------|------------|
| Pd | 10.99709313 | 7.71104600  | 6.00632300 |
| Pd | 4.55773735  | 7.71104600  | 6.00632300 |
| Pd | 7.78209600  | 10.91780786 | 5.98301847 |
| Pd | 7.78209600  | 4.50428414  | 6.02962753 |
| Pd | 6.78663388  | 8.69969463  | 7.17319539 |
| Pd | 6.78663388  | 6.72239737  | 4.83945061 |
| Pd | 8.75816641  | 8.67703958  | 4.85862279 |
| Pd | 8.75816641  | 6.74505242  | 7.15402321 |
| Bi | 6.18897405  | 9.28877228  | 4.58260822 |
| Bi | 6.18897405  | 6.13331972  | 7.43003778 |
| Bi | 9.35879642  | 6.11728075  | 4.57824763 |
| Bi | 9.35879642  | 9.30481125  | 7.43439837 |

**Pd<sub>8</sub>Bi<sub>5</sub>**

|    |            |            |            |
|----|------------|------------|------------|
| Pd | 5.86656861 | 7.44771745 | 6.07350250 |
| Pd | 4.93054493 | 7.58563386 | 8.64007659 |
| Pd | 6.90325791 | 5.01227315 | 5.59856229 |
| Pd | 6.99696159 | 5.94708169 | 8.19685788 |
| Pd | 7.43191517 | 8.51346277 | 8.19902228 |
| Pd | 9.48484220 | 6.88819068 | 8.69917701 |
| Pd | 8.66051320 | 6.99008178 | 6.10668531 |
| Pd | 7.60306841 | 9.41830078 | 5.56612392 |
| Bi | 4.64941940 | 5.37420258 | 7.10550591 |
| Bi | 5.39783308 | 9.80051884 | 7.15130287 |
| Bi | 9.07219283 | 4.65293038 | 7.22938657 |
| Bi | 9.78521795 | 9.10842238 | 7.15512159 |
| Bi | 7.29768471 | 7.19002011 | 3.88742099 |

**Pd<sub>8</sub>Bi<sub>6</sub>**

|    |             |             |             |
|----|-------------|-------------|-------------|
| Pd | 9.73547514  | 7.35288055  | 8.73795263  |
| Pd | 7.35288055  | 5.62757886  | 8.73795263  |
| Pd | 5.62757886  | 8.01017345  | 8.73795263  |
| Pd | 8.01017345  | 9.73547514  | 8.73795263  |
| Pd | 5.62736378  | 8.00874469  | 6.03680237  |
| Pd | 7.35430931  | 5.62736378  | 6.03680237  |
| Pd | 9.73569022  | 7.35430931  | 6.03680237  |
| Pd | 8.00874469  | 9.73569022  | 6.03680237  |
| Bi | 10.28353673 | 9.56708071  | 7.38737750  |
| Bi | 9.56708071  | 5.07951727  | 7.38737750  |
| Bi | 5.07951727  | 5.79597329  | 7.38737750  |
| Bi | 5.79597329  | 10.28353673 | 7.38737750  |
| Bi | 7.68152700  | 7.68152700  | 10.28566731 |
| Bi | 7.68152700  | 7.68152700  | 4.48908769  |

**Pd<sub>8</sub>Bi<sub>7</sub>**

|    |             |            |             |
|----|-------------|------------|-------------|
| Pd | 6.52613866  | 5.21008547 | 7.96308399  |
| Pd | 7.85927022  | 7.73031670 | 7.07010591  |
| Pd | 6.15977717  | 7.69854135 | 9.29100410  |
| Pd | 9.31499126  | 5.38780438 | 7.84926144  |
| Pd | 9.37954052  | 8.06866478 | 9.16300432  |
| Pd | 9.24475239  | 6.60649184 | 5.16714779  |
| Pd | 6.15308260  | 6.30871019 | 5.36502214  |
| Pd | 5.62413429  | 9.08982079 | 6.60260392  |
| Bi | 7.99275963  | 5.96562621 | 10.04007094 |
| Bi | 4.52947165  | 6.82663099 | 7.38944782  |
| Bi | 7.33587237  | 9.93403996 | 8.55218361  |
| Bi | 7.29335490  | 8.53143494 | 4.53722178  |
| Bi | 11.04120074 | 7.18163434 | 7.16155704  |
| Bi | 7.91316692  | 4.41196518 | 5.85236648  |
| Bi | 9.58923670  | 9.66952539 | 6.38455483  |

**Pd<sub>8</sub>Bi<sub>8</sub>**

|    |             |            |            |
|----|-------------|------------|------------|
| Pd | 8.47839747  | 9.41135625 | 5.86948320 |
| Pd | 9.53766510  | 5.51111177 | 6.29092162 |
| Pd | 10.89846947 | 7.97024839 | 6.66211501 |
| Pd | 8.08419797  | 6.98397196 | 8.27177894 |
| Pd | 7.24325128  | 6.97751023 | 5.75652654 |
| Pd | 4.38843600  | 7.91286311 | 7.38067641 |
| Pd | 5.81011729  | 5.48530765 | 7.72566049 |
| Pd | 6.77698244  | 9.38456790 | 8.15296060 |
| Bi | 7.18436480  | 4.26588126 | 5.57869868 |
| Bi | 8.17987702  | 4.26853442 | 8.42509429 |
| Bi | 9.58995249  | 7.42973131 | 4.49166438 |
| Bi | 5.81400631  | 9.35573975 | 5.71116158 |
| Bi | 9.44037839  | 9.39861823 | 8.30816908 |
| Bi | 4.64901556  | 6.17393095 | 5.43282964 |
| Bi | 5.72442108  | 7.38340086 | 9.53950183 |
| Bi | 10.68922802 | 6.20158943 | 8.58812770 |

**Pd<sub>8</sub>Bi<sub>9</sub>**

|    |             |             |             |
|----|-------------|-------------|-------------|
| Pd | 10.20186892 | 8.34365147  | 8.42783433  |
| Pd | 8.32810422  | 10.48369212 | 8.54629531  |
| Pd | 8.08289497  | 8.36550628  | 6.65999632  |
| Pd | 6.19918620  | 6.33307030  | 6.71469597  |
| Pd | 5.64010848  | 8.60373441  | 5.28822149  |
| Pd | 6.25626734  | 8.57883188  | 8.97891977  |
| Pd | 8.19045899  | 6.56907774  | 8.87721917  |
| Pd | 8.82193079  | 5.52530002  | 6.29188209  |
| Bi | 10.01033275 | 10.27877457 | 6.56985874  |
| Bi | 8.50997644  | 8.67631321  | 10.46524633 |
| Bi | 10.74477780 | 7.39119837  | 5.80355445  |
| Bi | 7.58502230  | 6.97793266  | 4.44785101  |
| Bi | 6.13044917  | 10.44934010 | 7.10926134  |
| Bi | 4.14298905  | 7.83301163  | 7.38831640  |
| Bi | 5.58540831  | 5.99507887  | 9.53362989  |
| Bi | 10.61841497 | 5.64679561  | 8.33498573  |
| Bi | 7.22818736  | 4.12800125  | 7.87522113  |

**Pd<sub>8</sub>Bi<sub>10</sub>**

|    |             |             |            |
|----|-------------|-------------|------------|
| Pd | 7.79289570  | 7.39394926  | 5.17673406 |
| Pd | 6.28456718  | 9.29519013  | 6.39753421 |
| Pd | 7.95838524  | 7.62191003  | 8.02067972 |
| Pd | 10.16130516 | 8.02768657  | 6.37350783 |
| Pd | 8.66243798  | 10.24073818 | 7.77018221 |
| Pd | 8.35770307  | 5.00088216  | 7.18923267 |
| Pd | 5.90242957  | 6.24547676  | 6.87092961 |
| Pd | 5.80257336  | 6.79287494  | 9.46294848 |
| Bi | 6.37859984  | 9.51472828  | 9.07316658 |
| Bi | 6.86952003  | 4.77024410  | 4.83607689 |
| Bi | 5.18219012  | 7.53752460  | 4.58184893 |
| Bi | 6.05471295  | 4.22811367  | 8.50365137 |
| Bi | 4.07243047  | 8.02687615  | 7.59625181 |
| Bi | 10.28612159 | 8.49713930  | 9.00383169 |
| Bi | 8.63402336  | 9.89096775  | 5.18152218 |
| Bi | 10.90878228 | 5.69013353  | 7.79602379 |
| Bi | 9.86898158  | 5.70433043  | 4.92334938 |
| Bi | 8.38634696  | 5.76799215  | 9.87871488 |

**Pd<sub>8</sub>Bi<sub>11</sub>**

|    |             |             |            |
|----|-------------|-------------|------------|
| Pd | 8.45545658  | 5.02923329  | 7.82397603 |
| Pd | 10.47165837 | 6.67056451  | 4.93962293 |
| Pd | 9.43029676  | 9.64885007  | 7.12499826 |
| Pd | 8.41526444  | 7.47559041  | 9.06586497 |
| Pd | 6.08516357  | 5.53075817  | 6.46834122 |
| Pd | 6.16726388  | 8.42916019  | 7.74149205 |
| Pd | 8.17759415  | 7.34212954  | 6.22233236 |
| Pd | 10.64586916 | 7.24594567  | 7.56845144 |
| Bi | 7.05043099  | 10.59639258 | 6.33792137 |
| Bi | 6.24160840  | 5.95606636  | 9.15432128 |
| Bi | 8.40404295  | 4.90093864  | 5.14569714 |
| Bi | 9.11641451  | 9.06040489  | 4.41102822 |
| Bi | 7.74530577  | 10.10726367 | 9.31383126 |
| Bi | 10.25286443 | 5.59869110  | 9.73765288 |
| Bi | 11.08591334 | 4.71020390  | 6.85061366 |
| Bi | 3.93075399  | 6.88399799  | 7.33272986 |
| Bi | 5.70578614  | 7.85490730  | 5.09340347 |
| Bi | 11.79478554 | 8.90746675  | 5.88773860 |
| Bi | 10.64997418 | 9.08348961  | 9.51494757 |

**Pd<sub>8</sub>Bi<sub>12</sub>**

|    |             |             |             |
|----|-------------|-------------|-------------|
| Pd | 7.36906661  | 11.01057652 | 6.93552766  |
| Pd | 7.09697755  | 5.97491823  | 6.34853844  |
| Pd | 7.82905095  | 8.50621932  | 6.10809180  |
| Pd | 5.57505164  | 7.88943798  | 7.90807870  |
| Pd | 7.79327062  | 9.12628064  | 8.80164992  |
| Pd | 8.42468352  | 6.48706002  | 9.39109871  |
| Pd | 10.44185648 | 8.96136935  | 7.90996134  |
| Pd | 9.64420737  | 6.51817989  | 6.97187477  |
| Bi | 5.37266306  | 9.54595883  | 5.69184596  |
| Bi | 4.63201661  | 6.62009945  | 5.78752663  |
| Bi | 5.45532016  | 10.47870681 | 8.73323717  |
| Bi | 6.31848029  | 7.77655846  | 10.57817972 |
| Bi | 5.93764295  | 5.28319322  | 8.73735166  |
| Bi | 11.76692584 | 7.79705438  | 5.84409696  |
| Bi | 8.70033121  | 4.24713368  | 7.80820763  |
| Bi | 9.78766839  | 10.24422782 | 5.59314396  |
| Bi | 11.28188556 | 6.55313974  | 9.04725864  |
| Bi | 9.77780130  | 8.68053857  | 10.58895936 |
| Bi | 9.14278124  | 6.94574605  | 4.42212613  |
| Bi | 9.40791482  | 11.35292704 | 8.61909448  |

**Pd<sub>8</sub>Bi<sub>13</sub>**

|    |             |             |             |
|----|-------------|-------------|-------------|
| Pd | 5.98660432  | 9.41932725  | 7.76625529  |
| Pd | 8.21820879  | 7.65084832  | 8.88672120  |
| Pd | 8.69889788  | 10.05761298 | 7.87276068  |
| Pd | 10.69930192 | 8.18928799  | 7.46884122  |
| Pd | 9.11379493  | 5.91529058  | 6.74492741  |
| Pd | 6.14316986  | 5.90435400  | 9.01949801  |
| Pd | 8.24957401  | 8.81219565  | 5.35848945  |
| Pd | 6.58229922  | 7.01488681  | 6.64846435  |
| Bi | 10.44976440 | 10.39099570 | 5.80208504  |
| Bi | 6.97381078  | 11.15443924 | 9.51073485  |
| Bi | 6.01577104  | 8.36519664  | 10.30388388 |
| Bi | 7.08810004  | 11.28219191 | 6.05932984  |
| Bi | 11.06991962 | 10.40070649 | 8.97983682  |
| Bi | 10.57555098 | 7.64226780  | 10.14706229 |
| Bi | 11.51694729 | 5.68114900  | 7.87347798  |
| Bi | 8.75540739  | 5.02945918  | 9.32798554  |
| Bi | 10.59913190 | 7.33164973  | 4.89001222  |
| Bi | 7.72921426  | 6.25623498  | 4.35585642  |
| Bi | 6.88140878  | 4.33249478  | 6.91155222  |
| Bi | 4.19634400  | 7.41997020  | 7.88698730  |
| Bi | 5.45096909  | 8.90245828  | 5.09649249  |

**Pd<sub>9</sub>Bi<sub>4</sub>**

|    |             |             |             |
|----|-------------|-------------|-------------|
| Pd | 10.73544964 | 9.84879989  | 7.31229040  |
| Pd | 9.21013756  | 8.48442391  | 8.98628675  |
| Pd | 11.57872657 | 7.12333375  | 8.43789206  |
| Pd | 8.01684585  | 6.08207898  | 8.87660781  |
| Pd | 9.67558537  | 6.38629484  | 6.33520626  |
| Pd | 6.17343824  | 7.23003550  | 6.71321479  |
| Pd | 6.92513310  | 9.77433724  | 8.14996768  |
| Pd | 8.46219374  | 8.76498824  | 6.25466007  |
| Bi | 9.02274465  | 11.15120567 | 9.35835885  |
| Bi | 11.71595813 | 9.41129415  | 9.89236267  |
| Bi | 6.88824195  | 8.13519077  | 10.38105734 |
| Bi | 12.35002594 | 6.08823791  | 6.06377874  |
| Bi | 10.32361343 | 4.65212953  | 8.29904984  |
| Bi | 10.09563141 | 6.63284223  | 10.70348626 |
| Bi | 13.22348815 | 8.84508598  | 7.14970247  |
| Bi | 7.67573096  | 7.01156835  | 4.42123477  |
| Bi | 5.33527476  | 5.84024603  | 8.88771763  |
| Bi | 7.41506886  | 4.75570420  | 6.59260916  |
| Bi | 4.45712375  | 8.72836804  | 8.17986347  |
| Bi | 8.59956684  | 11.45137379 | 6.45552193  |
| Bi | 10.79737724 | 8.51474232  | 4.87714938  |
| Bi | 5.95221517  | 9.69635068  | 5.54009118  |

**Pd<sub>9</sub>Bi<sub>5</sub>**

|    |             |             |             |
|----|-------------|-------------|-------------|
| Pd | 10.16632804 | 9.77133577  | 6.67423676  |
| Pd | 8.30957747  | 9.80172747  | 9.00072954  |
| Pd | 11.27125141 | 8.28430868  | 8.82845298  |
| Pd | 8.35361232  | 7.03063488  | 9.44053216  |
| Pd | 10.22102377 | 6.00675789  | 7.26742718  |
| Pd | 6.59399233  | 9.48043224  | 6.58737020  |
| Pd | 6.55190532  | 6.30538868  | 7.18527119  |
| Pd | 8.54517782  | 7.68892234  | 6.03513381  |
| Bi | 12.84942765 | 9.56033978  | 7.03662494  |
| Bi | 9.85131888  | 8.70828906  | 11.09042341 |
| Bi | 8.16529900  | 4.48206449  | 8.49566079  |
| Bi | 10.79279853 | 10.98986513 | 9.04222591  |
| Bi | 6.78847958  | 8.75922749  | 11.04169074 |
| Bi | 10.81775509 | 5.83122966  | 9.93069445  |
| Bi | 12.86400158 | 6.50552126  | 7.56078388  |
| Bi | 11.10516421 | 7.64839468  | 5.14579754  |
| Bi | 6.13145252  | 7.48880592  | 4.75791962  |
| Bi | 5.68813013  | 6.23136549  | 9.70712850  |
| Bi | 8.39613412  | 9.96372493  | 4.56866023  |
| Bi | 4.43390219  | 8.02087083  | 7.39383770  |
| Bi | 5.64666920  | 10.58623748 | 8.83582874  |
| Bi | 8.30669051  | 5.04796442  | 5.49233405  |
| Bi | 8.15018593  | 11.71330075 | 7.07697466  |

**Pd<sub>9</sub>**

|    |            |            |            |
|----|------------|------------|------------|
| Pd | 8.57944934 | 5.45963516 | 7.10746023 |
| Pd | 6.51035138 | 4.37819824 | 6.00270500 |
| Pd | 8.60740327 | 4.97559388 | 4.60610930 |
| Pd | 8.61589741 | 7.39670132 | 5.40265512 |
| Pd | 4.38686749 | 4.95077946 | 4.62054643 |
| Pd | 6.48598763 | 6.38463334 | 4.35060743 |
| Pd | 6.51815611 | 6.93196147 | 6.81073880 |
| Pd | 4.44960449 | 5.47482258 | 7.10548270 |
| Pd | 4.38172938 | 7.39927406 | 5.43242099 |

**Pd<sub>9</sub>Bi**

|    |            |            |            |
|----|------------|------------|------------|
| Pd | 5.15304962 | 8.72396932 | 5.80831278 |
| Pd | 4.34609785 | 6.39951168 | 6.65818732 |
| Pd | 7.85319392 | 5.71819796 | 4.29847593 |
| Pd | 9.23473495 | 7.50741791 | 5.78754665 |
| Pd | 6.85195951 | 6.98394064 | 6.65958767 |
| Pd | 7.59239113 | 9.43862272 | 6.60064782 |
| Pd | 5.31208272 | 6.47595440 | 4.29630141 |
| Pd | 6.14839087 | 4.62854257 | 5.94200616 |
| Pd | 8.62451331 | 5.13787405 | 6.66886640 |
| Bi | 7.24963112 | 8.32806762 | 4.20478924 |

**Pd<sub>9</sub>Bi<sub>2</sub>**

|    |            |            |            |
|----|------------|------------|------------|
| Pd | 4.52182049 | 7.20920390 | 7.84722545 |
| Pd | 7.81363156 | 4.39935174 | 7.87633075 |
| Pd | 8.68092195 | 8.68210721 | 7.87945571 |
| Pd | 5.91460484 | 5.49603668 | 6.49276994 |
| Pd | 4.55255844 | 7.28900738 | 5.19576666 |
| Pd | 8.68385673 | 6.45889399 | 6.54673111 |
| Pd | 6.46764921 | 8.36790554 | 6.55638058 |
| Pd | 8.66571446 | 8.68873154 | 5.21991648 |
| Pd | 7.88930392 | 4.37504900 | 5.22776157 |
| Bi | 7.00235472 | 6.77866334 | 8.67609888 |
| Bi | 7.03859713 | 6.76178418 | 4.39492637 |

**Pd<sub>9</sub>Bi<sub>3</sub>**

|    |            |            |            |
|----|------------|------------|------------|
| Pd | 6.92641839 | 4.50508333 | 4.98417907 |
| Pd | 4.50743800 | 7.45497132 | 7.37859322 |
| Pd | 5.52111828 | 4.84526189 | 7.30680615 |
| Pd | 5.32669632 | 8.59247870 | 5.02119707 |
| Pd | 6.80274109 | 6.80335362 | 6.05695992 |
| Pd | 6.71710998 | 9.08073612 | 7.28895522 |
| Pd | 9.03868888 | 7.64195455 | 7.37478536 |
| Pd | 8.23103763 | 4.96819374 | 7.35385492 |
| Pd | 8.12060030 | 8.69268571 | 5.00728177 |
| Bi | 4.52046024 | 6.02718476 | 5.06684025 |
| Bi | 9.14737086 | 6.20261507 | 5.08545786 |
| Bi | 6.78448002 | 6.83160318 | 8.74337798 |

**Pd<sub>9</sub>Bi<sub>4</sub>**

|    |             |            |            |
|----|-------------|------------|------------|
| Pd | 9.50555917  | 9.02426430 | 6.06167697 |
| Pd | 8.52679057  | 6.78775744 | 7.13947037 |
| Pd | 7.19340261  | 8.18195165 | 4.91413501 |
| Pd | 5.82675269  | 6.78986241 | 7.25968130 |
| Pd | 4.96291633  | 9.10277277 | 6.07825486 |
| Pd | 10.98913585 | 6.79855388 | 6.37703332 |
| Pd | 9.51890595  | 4.56269889 | 6.00652666 |
| Pd | 7.18821387  | 5.39023603 | 4.91198535 |
| Pd | 4.95741266  | 4.48296818 | 6.14057071 |
| Bi | 7.22720445  | 9.06151542 | 7.49106731 |
| Bi | 9.38860242  | 6.80015638 | 4.34681907 |
| Bi | 4.93281860  | 6.77785731 | 4.73239764 |
| Bi | 7.25874183  | 4.51220684 | 7.48269942 |

**Pd<sub>9</sub>Bi<sub>5</sub>**

|    |             |            |            |
|----|-------------|------------|------------|
| Pd | 5.76742706  | 6.78850990 | 8.52251145 |
| Pd | 7.90684900  | 8.22319575 | 7.67305357 |
| Pd | 6.48114813  | 6.79405370 | 5.64043981 |
| Pd | 7.61969199  | 9.13123443 | 5.12926913 |
| Pd | 4.01501979  | 6.79275969 | 6.43537502 |
| Pd | 10.19726117 | 6.84387977 | 7.91669323 |
| Pd | 7.68891856  | 4.46994924 | 5.14811918 |
| Pd | 7.93554199  | 5.40325511 | 7.67843734 |
| Pd | 9.02492166  | 6.81650131 | 5.37385404 |
| Bi | 5.51957718  | 8.99554078 | 6.90251658 |
| Bi | 10.01830474 | 9.05078807 | 6.34904287 |
| Bi | 8.18202915  | 6.82174544 | 9.86802984 |
| Bi | 5.55581059  | 4.59512738 | 6.87761149 |
| Bi | 10.07743198 | 4.62134805 | 6.37919474 |

**Pd<sub>9</sub>Bi<sub>6</sub>**

|    |             |            |            |
|----|-------------|------------|------------|
| Pd | 7.59354667  | 7.24563862 | 7.23061392 |
| Pd | 8.44882503  | 7.10520988 | 4.77034468 |
| Pd | 8.50518464  | 9.58326090 | 6.49277316 |
| Pd | 5.68609570  | 9.03279880 | 7.38394519 |
| Pd | 5.61646607  | 6.55381972 | 5.66813866 |
| Pd | 6.73248355  | 7.38814102 | 9.68930720 |
| Pd | 9.56716552  | 7.95074055 | 8.78899746 |
| Pd | 6.67059730  | 4.91729706 | 7.97088370 |
| Pd | 9.50708605  | 5.46857122 | 7.07037154 |
| Bi | 10.51352721 | 7.83103389 | 6.29791738 |
| Bi | 7.52359819  | 4.68939763 | 5.45142179 |
| Bi | 7.65582768  | 9.80718702 | 9.01563279 |
| Bi | 6.50320378  | 8.93575738 | 4.84090165 |

|    |            |            |            |
|----|------------|------------|------------|
| Bi | 8.68507383 | 5.56464107 | 9.61230179 |
| Bi | 4.66447146 | 6.68483724 | 8.15443301 |

**Pd<sub>9</sub>Bi<sub>7</sub>**

|    |             |             |            |
|----|-------------|-------------|------------|
| Pd | 7.50859044  | 8.09903378  | 4.54030631 |
| Pd | 7.38284106  | 9.44595560  | 8.70526896 |
| Pd | 5.42069992  | 8.64717625  | 6.59066644 |
| Pd | 9.75596040  | 8.91116255  | 6.65627206 |
| Pd | 7.68802813  | 7.30376668  | 7.10400909 |
| Pd | 5.42191234  | 5.90497740  | 7.48920779 |
| Pd | 9.72417332  | 5.68383750  | 7.63238992 |
| Pd | 7.50956970  | 5.13866805  | 5.50801756 |
| Pd | 7.36132843  | 6.47017099  | 9.64815800 |
| Bi | 5.35392374  | 6.58170279  | 4.93172475 |
| Bi | 7.49096377  | 10.22756723 | 6.15703035 |
| Bi | 9.67810148  | 6.63734482  | 5.04945986 |
| Bi | 7.46495898  | 4.33159632  | 8.05145645 |
| Bi | 9.55056456  | 7.95342889  | 9.22936128 |
| Bi | 5.21859937  | 7.96351382  | 9.14444319 |
| Bi | 11.82022434 | 7.28894532  | 7.16501380 |

**Pd<sub>9</sub>Bi<sub>8</sub>**

|    |             |             |            |
|----|-------------|-------------|------------|
| Pd | 7.36380152  | 7.21492492  | 9.88028376 |
| Pd | 4.75276422  | 8.75553309  | 6.48387174 |
| Pd | 5.00004998  | 6.84027066  | 8.38310737 |
| Pd | 10.34995824 | 6.66059279  | 6.59137889 |
| Pd | 7.31019432  | 7.69431749  | 6.91391466 |
| Pd | 8.54326176  | 5.39174395  | 8.17806575 |
| Pd | 6.34898988  | 5.22565187  | 6.54787739 |
| Pd | 8.52096908  | 9.62630089  | 8.40587545 |
| Pd | 8.51261660  | 6.90886728  | 4.50972642 |
| Bi | 5.91166340  | 9.23449022  | 8.98472041 |
| Bi | 9.50661980  | 9.04122656  | 5.86242798 |
| Bi | 3.75814987  | 6.13791729  | 6.19364686 |
| Bi | 9.88408200  | 7.44714612  | 9.07749781 |
| Bi | 6.27348289  | 4.78494107  | 9.29072103 |
| Bi | 8.83658801  | 4.60456649  | 5.70021441 |
| Bi | 5.94562626  | 7.35786600  | 4.53557513 |
| Bi | 6.86771666  | 10.44886527 | 6.25381246 |

**Pd<sub>9</sub>Bi<sub>9</sub>**

|    |             |            |            |
|----|-------------|------------|------------|
| Pd | 7.13651021  | 9.32167745 | 6.65181611 |
| Pd | 8.03242539  | 7.06430096 | 5.12910056 |
| Pd | 9.57048725  | 9.16092196 | 7.99981773 |
| Pd | 10.50493153 | 7.02198810 | 6.23008317 |
| Pd | 8.03976498  | 6.91671348 | 7.96228981 |
| Pd | 9.62257570  | 4.68034742 | 7.78168145 |
| Pd | 5.58115111  | 6.85988382 | 9.26371135 |
| Pd | 5.59339386  | 6.92167756 | 6.64996357 |
| Pd | 7.18971851  | 4.62176573 | 6.50540952 |
| Bi | 9.48154949  | 4.81597661 | 5.13350736 |
| Bi | 9.46926134  | 9.32262299 | 5.36083615 |
| Bi | 10.60509812 | 6.87908660 | 8.83080705 |
| Bi | 7.20203693  | 9.07842370 | 9.36467464 |
| Bi | 4.68340482  | 4.67915159 | 7.64143596 |
| Bi | 7.29109576  | 4.67228253 | 9.25485566 |
| Bi | 5.83886935  | 5.48983985 | 4.36059228 |
| Bi | 5.76221974  | 8.55281538 | 4.47807402 |
| Bi | 4.59419466  | 9.08536228 | 7.71069559 |

**Pd<sub>9</sub>Bi<sub>10</sub>**

|    |             |             |             |
|----|-------------|-------------|-------------|
| Pd | 6.89998597  | 6.47369723  | 6.24818520  |
| Pd | 6.95602886  | 9.12936781  | 5.67214164  |
| Pd | 8.41283180  | 8.07877644  | 7.88681626  |
| Pd | 9.62984111  | 6.12841079  | 6.43457314  |
| Pd | 9.87377047  | 9.04005861  | 5.80696298  |
| Pd | 7.41178504  | 6.03576046  | 9.43069213  |
| Pd | 5.78345121  | 7.92666952  | 8.33176377  |
| Pd | 7.21086715  | 9.89872921  | 9.53602033  |
| Pd | 10.15613860 | 9.87636694  | 8.88630578  |
| Bi | 8.37514214  | 10.85960733 | 7.17111314  |
| Bi | 5.07209202  | 5.36058787  | 8.06004977  |
| Bi | 4.57845890  | 7.74825314  | 5.86987548  |
| Bi | 5.91540404  | 7.89558924  | 10.90505510 |
| Bi | 5.27881552  | 10.40024070 | 7.54067384  |
| Bi | 11.29063643 | 7.81896079  | 7.70429272  |
| Bi | 8.48729034  | 7.35371999  | 4.33111608  |
| Bi | 10.02694812 | 5.33904923  | 9.13758480  |
| Bi | 7.88235177  | 4.19687980  | 7.32315426  |
| Bi | 9.01975240  | 8.07063341  | 10.57100054 |

**Pd<sub>9</sub>Bi<sub>11</sub>**

|    |             |             |             |
|----|-------------|-------------|-------------|
| Pd | 11.62605118 | 7.96161496  | 6.25890570  |
| Pd | 9.52974258  | 6.48361956  | 7.03718687  |
| Pd | 9.13675565  | 6.79512768  | 9.79323657  |
| Pd | 10.13417947 | 8.92769532  | 8.31539057  |
| Pd | 7.17867909  | 7.91894282  | 8.43475590  |
| Pd | 6.97565989  | 5.53016160  | 7.06698445  |
| Pd | 7.93926339  | 10.39856614 | 7.58859517  |
| Pd | 7.89910379  | 8.33099331  | 5.75468054  |
| Pd | 5.33167780  | 7.85465595  | 6.53691431  |
| Bi | 8.77515709  | 4.42985907  | 5.36640777  |
| Bi | 11.61541545 | 6.80737351  | 8.77265136  |
| Bi | 6.41188521  | 5.81407517  | 9.81235777  |
| Bi | 8.38510471  | 9.53069346  | 10.16408002 |
| Bi | 8.90024039  | 4.33080789  | 8.61893788  |
| Bi | 5.35337080  | 9.91350758  | 8.40698566  |
| Bi | 6.49251246  | 6.37896512  | 4.52441841  |
| Bi | 10.05998878 | 10.11411032 | 5.97016237  |
| Bi | 9.87636033  | 7.14341849  | 4.37588267  |
| Bi | 4.37733193  | 5.62485971  | 7.50796815  |
| Bi | 6.13153000  | 10.33619222 | 5.54552868  |

**Pd<sub>9</sub>Bi<sub>12</sub>**

|    |             |             |             |
|----|-------------|-------------|-------------|
| Pd | 5.37234903  | 8.22463699  | 6.38722033  |
| Pd | 7.57006191  | 6.70579160  | 6.41776286  |
| Pd | 6.84962904  | 6.61490699  | 9.02195728  |
| Pd | 10.52402553 | 6.40995948  | 7.57080684  |
| Pd | 10.40156221 | 10.14082455 | 7.71500815  |
| Pd | 6.77072039  | 9.65913777  | 8.98706218  |
| Pd | 7.48363184  | 9.84268613  | 6.36599409  |
| Pd | 9.64093779  | 8.33239052  | 5.78239171  |
| Pd | 8.83607945  | 8.18907058  | 8.57848685  |
| Bi | 4.57582390  | 8.10597797  | 9.05832809  |
| Bi | 7.12581762  | 8.22761870  | 4.27921910  |
| Bi | 5.19205029  | 5.67087339  | 7.13641421  |
| Bi | 8.50760540  | 4.47171383  | 7.68604565  |
| Bi | 9.71411426  | 5.73782192  | 5.07237097  |
| Bi | 9.34191988  | 6.06235098  | 10.10148454 |
| Bi | 5.08356953  | 10.73107206 | 7.21285253  |
| Bi | 12.18985465 | 8.36939013  | 6.42664688  |
| Bi | 8.29857948  | 11.98029476 | 7.88553356  |
| Bi | 11.64794785 | 8.25824304  | 9.35638982  |
| Bi | 9.15769476  | 10.26157572 | 10.22252181 |
| Bi | 9.66961527  | 10.97598442 | 5.24921656  |



Bi 8.13531059 7.95313817 4.43144156

**Pd<sub>10</sub>Bi<sub>5</sub>**

Pd 6.13120442 5.93640330 5.89452025  
Pd 9.09450553 9.08427062 6.07302813  
Pd 6.05540840 8.98258264 5.99847949  
Pd 9.22273485 6.03509300 5.96618900  
Pd 9.00864486 8.97226020 9.00974609  
Pd 6.05736667 5.82767458 8.83610268  
Pd 9.15345124 5.93975958 8.91274035  
Pd 5.99749495 8.88046207 8.93836085  
Pd 7.51633004 7.33179751 10.44943310  
Pd 7.58600833 7.43106896 7.57089470  
Bi 4.45554003 7.37450437 7.38429928  
Bi 7.66462792 7.55293941 4.44119484  
Bi 7.69930008 4.35256487 7.35262059  
Bi 7.48448144 10.59540446 7.55379447  
Bi 10.72629839 7.57938693 7.53109862

**Pd<sub>10</sub>Bi<sub>6</sub>**

Pd 11.37623926 7.71958804 6.82355848  
Pd 7.41068158 9.25826964 4.68864054  
Pd 7.38032485 6.22529804 4.68599648  
Pd 5.22712812 6.28779286 6.76425031  
Pd 9.45676198 9.48841274 6.78566037  
Pd 5.25124300 9.21881389 6.77614177  
Pd 7.46317407 7.73810904 6.78839934  
Pd 7.34576628 6.18870476 8.86127014  
Pd 7.37227133 9.27154534 8.87499210  
Pd 9.43126171 5.96405452 6.77686041  
Bi 9.64602723 7.72751014 4.69167781  
Bi 5.19896365 7.76393322 4.54088536  
Bi 7.20511139 4.52995388 6.75302325  
Bi 7.25599012 10.94394327 6.77409432  
Bi 5.18230855 7.74406609 9.00164909  
Bi 9.58907410 7.71279547 8.88691069

**Pd<sub>10</sub>Bi<sub>7</sub>**

Pd 8.93023616 6.70044459 9.62232228  
Pd 7.93694551 7.13185808 7.20777975  
Pd 10.57327066 6.22176538 5.95848520  
Pd 9.80853020 9.09452687 6.21643462  
Pd 7.09877977 9.30059141 5.98238375  
Pd 8.15436600 4.91307211 5.70704835  
Pd 4.92675476 6.42945446 7.65029024  
Pd 6.09541867 6.80377096 5.15441231  
Pd 7.04653929 4.69360511 8.36308673  
Pd 5.85015092 8.89458237 8.60035085  
Bi 9.62815240 4.65824335 7.94803232  
Bi 8.41214506 9.42600312 8.56018522  
Bi 8.61935694 7.39375919 4.51029905  
Bi 10.97375542 7.68438385 8.10034613  
Bi 5.61760940 4.38006883 6.14504021  
Bi 6.23242905 6.64450999 9.91350876  
Bi 4.58162678 8.66896733 6.29132917

**Pd<sub>10</sub>Bi<sub>8</sub>**

Pd 7.01728640 5.52697464 9.41096658  
Pd 5.39131431 7.84998944 9.49320444  
Pd 9.75445450 9.12661874 8.84011460  
Pd 6.95690120 9.74086224 6.12505852  
Pd 7.11819161 9.89411891 8.93434764  
Pd 9.64998811 6.28885872 8.82697204  
Pd 7.55138573 7.53360115 7.56184424  
Pd 9.66667920 6.35484770 5.90154560  
Pd 9.73900209 9.20630472 6.07330783  
Pd 6.82467310 5.89323686 5.48830002  
Bi 8.03177320 7.82087941 10.39931089  
Bi 5.03539776 8.00106208 5.15475915  
Bi 8.82175093 11.22709624 7.46972711  
Bi 5.13868742 6.03967623 7.57293048  
Bi 4.80424632 9.73870941 7.71207472  
Bi 8.32461044 4.55146100 7.28306403  
Bi 11.38878762 7.65462775 7.42877955

**Pd<sub>10</sub>Bi<sub>9</sub>**

Pd 9.87847879 7.52350405 7.63297312  
Pd 8.56013997 6.21165073 5.65864861  
Pd 8.32312340 9.59138434 6.43212591  
Pd 8.34140311 9.36219784 9.20549621  
Pd 5.51599520 8.93739876 9.23947538  
Pd 5.72078991 5.87634118 9.20231544  
Pd 7.17988250 7.48133717 7.65689005  
Pd 5.72675406 6.23506654 5.79054346  
Pd 5.52783054 9.18653320 6.32957670  
Pd 8.58576254 5.82116211 9.32630425  
Bi 10.32352775 4.95899675 7.38048432  
Bi 7.10900990 8.13958853 4.45142457  
Bi 10.34100191 8.22364609 5.10588301  
Bi 10.58663163 10.09750963 7.86958867  
Bi 7.12716568 7.52476230 10.82865163  
Bi 4.16774272 7.33720562 7.62752911  
Bi 6.62052340 10.99375528 7.95623403  
Bi 7.18167949 4.54704108 7.34630635  
Bi 10.34970801 7.72433378 10.23502539

**Pd<sub>10</sub>Bi<sub>10</sub>**

Pd 9.12680932 10.17110779 8.56043816  
Pd 6.65908779 9.20803060 9.42280533  
Pd 9.36625526 6.21815969 8.22960862  
Pd 5.12426086 8.88207585 6.97456908  
Pd 7.89833331 8.08597696 7.11697033  
Pd 5.55762337 6.00616510 7.26074751  
Pd 6.99996978 6.40589914 9.55835653  
Pd 10.70102095 8.02843534 6.67068111  
Pd 7.90974016 5.68763507 5.81957289  
Pd 7.19552057 9.64477908 5.08617316  
Bi 8.95665431 8.05568533 10.22648100  
Bi 6.77511742 10.92403097 7.40993963  
Bi 5.87899277 7.27769590 4.99286151  
Bi 4.66272439 7.54021294 9.19191558  
Bi 7.46711162 4.29094463 8.01528919  
Bi 9.73032684 10.42927294 5.91517776  
Bi 10.57041407 5.36085362 5.90992556  
Bi 12.04675226 6.51975011 8.44941697  
Bi 9.15231949 7.77505883 4.38427186  
Bi 11.64296913 9.46983011 8.75411865

**Pd<sub>10</sub>Bi<sub>11</sub>**

Pd 9.77033202 7.20710930 9.28716713  
Pd 9.66578272 5.89091596 6.84184865  
Pd 11.29036356 8.36354735 7.23151695  
Pd 9.59525074 10.64306029 7.58406826  
Pd 8.35787019 8.29166959 7.15226391  
Pd 8.34236328 9.36980572 9.88586270  
Pd 6.21273638 8.04140043 8.79283492  
Pd 7.36141201 5.61570776 8.33359105  
Pd 6.25643920 6.87615948 6.20887621  
Pd 8.55576468 7.10911070 4.70906425  
Bi 7.60208128 6.85787186 10.77659535  
Bi 9.67089544 4.45080014 9.14634797  
Bi 11.33269962 6.66993515 4.96732037  
Bi 12.08879226 6.01691416 8.19682921  
Bi 10.98361697 9.59142377 9.57002265  
Bi 10.01196309 9.44741068 5.15945715  
Bi 4.17459856 8.46390956 7.02031075  
Bi 4.67176461 5.78475081 8.16600858  
Bi 7.62725680 4.65175182 5.74078136  
Bi 6.70259612 9.22574717 5.09096353  
Bi 6.89903948 10.51965295 7.92302002

|                                   |             |             |             |
|-----------------------------------|-------------|-------------|-------------|
| Pd <sub>10</sub> Bi <sub>12</sub> |             |             |             |
| Pd                                | 7.49039955  | 8.13033384  | 5.78982370  |
| Pd                                | 9.66812595  | 11.10403427 | 8.71734961  |
| Pd                                | 8.60494814  | 10.50159438 | 6.37503260  |
| Pd                                | 10.32069124 | 8.37408253  | 6.19971028  |
| Pd                                | 6.16508099  | 9.99781348  | 7.59912943  |
| Pd                                | 6.44687093  | 6.73768102  | 8.13536055  |
| Pd                                | 9.99204295  | 6.46190303  | 9.42207034  |
| Pd                                | 8.99567575  | 6.10579971  | 7.02881039  |
| Pd                                | 8.53146993  | 8.63224945  | 8.45598362  |
| Pd                                | 12.68773684 | 8.82955061  | 7.37105019  |
| Bi                                | 6.42287770  | 10.43378839 | 4.91100510  |
| Bi                                | 11.22234833 | 10.89769231 | 6.51517859  |
| Bi                                | 7.43200761  | 12.44247590 | 7.74300922  |
| Bi                                | 11.10278629 | 8.94081294  | 9.44909882  |
| Bi                                | 7.29503575  | 10.45632317 | 10.07303644 |
| Bi                                | 6.76312693  | 5.42296729  | 5.69052276  |
| Bi                                | 11.66299870 | 6.33507977  | 7.27014689  |
| Bi                                | 4.77340641  | 8.01905470  | 6.27326765  |
| Bi                                | 7.95016032  | 4.60012010  | 8.94963127  |
| Bi                                | 4.83979610  | 8.47759800  | 9.37189835  |
| Bi                                | 7.60201437  | 7.18335210  | 10.58734849 |
| Bi                                | 9.24128222  | 6.76476981  | 4.35413983  |

|                                   |             |             |             |
|-----------------------------------|-------------|-------------|-------------|
| Pd <sub>10</sub> Bi <sub>13</sub> |             |             |             |
| Pd                                | 6.82625597  | 5.18461053  | 6.80114340  |
| Pd                                | 10.01408956 | 5.15699674  | 6.96127515  |
| Pd                                | 7.10783663  | 7.75369121  | 5.94472873  |
| Pd                                | 9.85807821  | 7.70756947  | 6.07090900  |
| Pd                                | 5.76790512  | 8.36713529  | 8.38244841  |
| Pd                                | 8.39928328  | 6.87765882  | 8.16313546  |
| Pd                                | 10.74025028 | 8.52129541  | 8.71763407  |
| Pd                                | 8.16273495  | 9.02963244  | 9.57415975  |
| Pd                                | 8.28820466  | 10.23447323 | 7.10594558  |
| Pd                                | 8.09551014  | 6.46396646  | 10.67625884 |
| Bi                                | 8.51114204  | 5.75509809  | 4.77840568  |
| Bi                                | 4.65233848  | 6.83506091  | 6.43511438  |
| Bi                                | 8.28028707  | 4.24242042  | 8.85623097  |
| Bi                                | 8.55957710  | 9.52666513  | 4.51186829  |
| Bi                                | 5.66052801  | 10.04354669 | 6.15002340  |
| Bi                                | 5.56141706  | 5.80976436  | 9.33180547  |
| Bi                                | 6.39887218  | 10.99195809 | 8.99844345  |
| Bi                                | 6.11053585  | 8.30359706  | 11.12341621 |
| Bi                                | 9.86913296  | 11.08502796 | 9.20971650  |
| Bi                                | 9.98225322  | 8.38891760  | 11.39483778 |
| Bi                                | 11.02350740 | 10.14871611 | 6.46676648  |
| Bi                                | 12.18312704 | 6.93524082  | 7.02841695  |
| Bi                                | 10.83237316 | 5.94730319  | 9.68167542  |

|                                   |             |             |             |
|-----------------------------------|-------------|-------------|-------------|
| Pd <sub>10</sub> Bi <sub>14</sub> |             |             |             |
| Pd                                | 8.98132553  | 10.79388431 | 8.39876446  |
| Pd                                | 10.55976181 | 8.83509442  | 9.75858944  |
| Pd                                | 8.19881213  | 7.90516888  | 10.86630081 |
| Pd                                | 5.69309815  | 7.41331823  | 7.93152859  |
| Pd                                | 7.78573953  | 5.73854965  | 9.28408741  |
| Pd                                | 6.55326049  | 9.65465815  | 9.50414814  |
| Pd                                | 8.27569529  | 6.36139296  | 5.67192699  |
| Pd                                | 10.67372519 | 9.02047449  | 6.38467087  |
| Pd                                | 7.18944403  | 9.92246243  | 6.04575658  |
| Pd                                | 10.69902959 | 6.56315538  | 8.21552206  |
| Bi                                | 6.66844911  | 11.94532697 | 7.87676505  |
| Bi                                | 8.68395206  | 10.48088393 | 11.04315779 |
| Bi                                | 4.68655488  | 9.78498957  | 7.28133343  |
| Bi                                | 5.70871983  | 7.11433625  | 10.54250075 |
| Bi                                | 10.11575215 | 6.08365348  | 10.74225714 |
| Bi                                | 8.39546150  | 8.11719713  | 7.99039704  |
| Bi                                | 5.93290284  | 7.66173149  | 5.10249311  |
| Bi                                | 8.89760150  | 8.64834227  | 4.27599142  |
| Bi                                | 11.65583193 | 10.93757287 | 8.16553972  |
| Bi                                | 6.31076710  | 4.97398498  | 7.02487900  |
| Bi                                | 9.31880826  | 4.38230285  | 7.31854495  |
| Bi                                | 11.00060628 | 6.41711939  | 5.49549465  |

|    |             |             |            |
|----|-------------|-------------|------------|
| Bi | 12.74885599 | 8.18717339  | 8.03010926 |
| Bi | 9.47077079  | 11.43081214 | 5.78057333 |

|                                   |             |             |             |
|-----------------------------------|-------------|-------------|-------------|
| Pd <sub>10</sub> Bi <sub>15</sub> |             |             |             |
| Pd                                | 9.95852643  | 10.90829027 | 7.00181594  |
| Pd                                | 8.64207439  | 10.30210005 | 10.07187050 |
| Pd                                | 11.16507196 | 8.29712853  | 8.39753473  |
| Pd                                | 9.35433345  | 6.13070486  | 6.86525824  |
| Pd                                | 9.70359487  | 8.58373751  | 5.38343111  |
| Pd                                | 8.30147967  | 6.65967285  | 9.88346077  |
| Pd                                | 6.85278513  | 8.91091184  | 5.46996025  |
| Pd                                | 5.58940409  | 8.79200510  | 8.59146162  |
| Pd                                | 6.66733777  | 6.43978319  | 6.90222638  |
| Pd                                | 7.27631584  | 11.25313015 | 7.07355470  |
| Bi                                | 8.84477150  | 12.70492533 | 8.71678238  |
| Bi                                | 8.53104690  | 10.95625931 | 4.70765597  |
| Bi                                | 11.29616002 | 10.83037932 | 9.44771361  |
| Bi                                | 11.78807068 | 6.81081148  | 6.10446573  |
| Bi                                | 10.79518112 | 5.69889743  | 9.18653649  |
| Bi                                | 12.18021388 | 9.74124453  | 6.24647825  |
| Bi                                | 10.23020580 | 8.25971406  | 11.03340065 |
| Bi                                | 6.09235727  | 11.29906748 | 9.60956612  |
| Bi                                | 6.77629060  | 8.57185717  | 11.14750004 |
| Bi                                | 5.59641442  | 6.17524754  | 9.44540700  |
| Bi                                | 7.90570583  | 4.41664680  | 8.32807140  |
| Bi                                | 4.45013425  | 7.66569689  | 6.27646421  |
| Bi                                | 8.02188649  | 6.59613884  | 4.55675987  |
| Bi                                | 8.33718381  | 8.64658281  | 7.78050028  |
| Bi                                | 4.78204554  | 10.57273083 | 6.58738935  |

|                  |            |            |            |
|------------------|------------|------------|------------|
| Pd <sub>11</sub> |            |            |            |
| Pd               | 7.78758767 | 4.50604192 | 7.81165063 |
| Pd               | 6.58005323 | 6.79747809 | 8.06589175 |
| Pd               | 6.77016518 | 5.62016807 | 5.63970464 |
| Pd               | 5.80613207 | 8.12904913 | 6.03593252 |
| Pd               | 9.10439392 | 6.78197893 | 7.80957058 |
| Pd               | 7.73366699 | 8.99588016 | 7.54559540 |
| Pd               | 5.17009145 | 4.75430247 | 7.43393921 |
| Pd               | 4.10158191 | 7.14562213 | 7.73131745 |
| Pd               | 8.31127764 | 7.65623339 | 5.47248546 |
| Pd               | 9.25261448 | 5.23298911 | 5.80977878 |
| Pd               | 4.31011245 | 6.13564564 | 5.41694966 |

|                     |            |            |            |
|---------------------|------------|------------|------------|
| Pd <sub>11</sub> Bi |            |            |            |
| Pd                  | 8.78648195 | 8.02283219 | 5.35687268 |
| Pd                  | 6.24952312 | 8.99729449 | 5.34932110 |
| Pd                  | 4.53018593 | 6.91181317 | 5.35268566 |
| Pd                  | 6.83659419 | 6.77054060 | 6.72244972 |
| Pd                  | 7.70607534 | 9.02590134 | 7.47486603 |
| Pd                  | 4.97175768 | 8.29992970 | 7.48301575 |
| Pd                  | 5.99896452 | 4.64334830 | 5.33742051 |
| Pd                  | 8.62075578 | 5.33410004 | 5.33680990 |
| Pd                  | 4.79532318 | 5.45595357 | 7.46974441 |
| Pd                  | 9.25781275 | 6.62788579 | 7.47885366 |
| Pd                  | 7.46563701 | 4.42641868 | 7.45459141 |
| Bi                  | 6.83710021 | 6.79193814 | 3.95148162 |

|                                  |            |            |            |
|----------------------------------|------------|------------|------------|
| Pd <sub>11</sub> Bi <sub>2</sub> |            |            |            |
| Pd                               | 8.35913932 | 4.90711823 | 6.03548259 |
| Pd                               | 7.85849458 | 8.33561755 | 8.74965395 |
| Pd                               | 8.07387651 | 7.14232240 | 4.52760053 |
| Pd                               | 5.46637778 | 8.90662426 | 7.60214784 |
| Pd                               | 5.95934710 | 5.48532261 | 4.89179446 |
| Pd                               | 5.74621940 | 6.65678987 | 9.10108494 |
| Pd                               | 6.07041248 | 4.54157005 | 7.43217977 |
| Pd                               | 8.23515711 | 5.64365775 | 8.64437328 |
| Pd                               | 6.91450108 | 6.90829420 | 6.81942200 |
| Pd                               | 5.60821399 | 8.18877660 | 4.99367986 |
| Pd                               | 7.77139587 | 9.26728189 | 6.20573702 |
| Bi                               | 4.27740704 | 6.55919983 | 6.78133770 |
| Bi                               | 9.55176107 | 7.25571694 | 6.84708869 |

**Pd<sub>11</sub>Bi<sub>3</sub>**

|    |             |            |            |
|----|-------------|------------|------------|
| Pd | 5.11754282  | 5.93814008 | 5.84107114 |
| Pd | 7.60115879  | 5.23193657 | 5.02286138 |
| Pd | 6.65138401  | 4.45221322 | 7.52727955 |
| Pd | 8.09245685  | 6.23858215 | 9.22356674 |
| Pd | 5.16724069  | 8.56365939 | 6.57691818 |
| Pd | 6.66043091  | 7.66985400 | 4.47530737 |
| Pd | 7.29965038  | 6.97535730 | 6.92387289 |
| Pd | 9.25175315  | 8.37556915 | 7.94394695 |
| Pd | 6.75441654  | 8.64415587 | 8.87877079 |
| Pd | 11.16633080 | 6.98278044 | 6.93579417 |
| Pd | 9.26804359  | 7.41407639 | 5.21496316 |
| Bi | 5.18031512  | 6.50697353 | 8.46802965 |
| Bi | 9.31176028  | 5.18263963 | 7.06274827 |
| Bi | 7.67409007  | 9.49707814 | 6.15510826 |

**Pd<sub>11</sub>Bi<sub>4</sub>**

|    |             |            |            |
|----|-------------|------------|------------|
| Pd | 9.27629535  | 6.68035180 | 8.36052661 |
| Pd | 7.01580964  | 8.19609394 | 9.01249366 |
| Pd | 8.44322526  | 4.49135112 | 6.78021046 |
| Pd | 4.86709180  | 6.68833399 | 8.15109366 |
| Pd | 5.68308205  | 4.45118486 | 6.78403535 |
| Pd | 4.84807553  | 6.68571357 | 5.44130983 |
| Pd | 5.61789420  | 8.86438041 | 6.78531031 |
| Pd | 6.98950152  | 8.18248122 | 4.54370903 |
| Pd | 7.09169319  | 6.73512519 | 6.78233992 |
| Pd | 9.26721837  | 6.67457345 | 5.19962304 |
| Pd | 10.97293420 | 8.04389486 | 6.77326598 |
| Bi | 10.92679288 | 5.38054530 | 6.77835227 |
| Bi | 7.02013633  | 5.36841076 | 9.06331584 |
| Bi | 8.44284705  | 8.97484099 | 6.76847809 |
| Bi | 6.99968287  | 5.36791355 | 4.50166239 |

**Pd<sub>11</sub>Bi<sub>5</sub>**

|    |             |            |            |
|----|-------------|------------|------------|
| Pd | 6.58774546  | 8.14454541 | 5.72382714 |
| Pd | 7.55109355  | 9.15509983 | 8.22263162 |
| Pd | 4.32686286  | 6.85228825 | 6.32100318 |
| Pd | 5.99368925  | 6.87306299 | 8.44025511 |
| Pd | 6.56538743  | 5.44456728 | 5.79478385 |
| Pd | 8.58881977  | 6.70635937 | 4.45329251 |
| Pd | 8.33164093  | 6.82554077 | 7.14542397 |
| Pd | 10.74600048 | 6.85697624 | 6.13273023 |
| Pd | 10.21000750 | 8.22107026 | 8.43113497 |
| Pd | 10.21156056 | 5.48209849 | 8.43951061 |
| Pd | 7.50096482  | 4.56653383 | 8.33048410 |
| Bi | 9.13895951  | 9.06859764 | 5.96032088 |
| Bi | 4.95364112  | 9.13786499 | 7.57398475 |
| Bi | 4.89653128  | 4.59883035 | 7.65668168 |
| Bi | 8.27696064  | 6.88405174 | 9.82863572 |
| Bi | 9.13540745  | 4.52326224 | 6.08395107 |

**Pd<sub>11</sub>Bi<sub>6</sub>**

|    |             |             |            |
|----|-------------|-------------|------------|
| Pd | 4.50146182  | 8.59412757  | 6.84662089 |
| Pd | 8.63733311  | 8.56995279  | 4.90296058 |
| Pd | 10.43155948 | 7.52985571  | 6.77816048 |
| Pd | 8.61219961  | 8.33829355  | 8.71865008 |
| Pd | 6.91709762  | 9.91267801  | 6.95758234 |
| Pd | 4.83128660  | 6.39688270  | 5.30805622 |
| Pd | 7.10840319  | 7.25180938  | 6.72974977 |
| Pd | 4.77760047  | 6.16140026  | 7.94011196 |
| Pd | 9.02553780  | 5.10891779  | 6.63537048 |
| Pd | 7.30890138  | 5.75479003  | 8.91991612 |
| Pd | 7.35928836  | 6.04682081  | 4.38849560 |
| Bi | 9.98488490  | 6.30716126  | 4.49635379 |
| Bi | 9.56623808  | 10.01905868 | 6.90585250 |
| Bi | 6.45026825  | 4.55227272  | 6.55104301 |
| Bi | 6.01655032  | 8.68877700  | 4.62470694 |
| Bi | 9.94321067  | 6.05701114  | 8.91338580 |
| Bi | 5.99522583  | 8.27341559  | 9.06833245 |

**Pd<sub>11</sub>Bi<sub>7</sub>**

|    |             |             |             |
|----|-------------|-------------|-------------|
| Pd | 6.83116732  | 5.77574965  | 8.80176227  |
| Pd | 6.89438915  | 5.90589838  | 5.87854370  |
| Pd | 7.45906898  | 7.98022830  | 7.38715297  |
| Pd | 9.52569181  | 6.33131180  | 8.75066956  |
| Pd | 5.38834771  | 8.14868507  | 9.33575357  |
| Pd | 7.29820161  | 10.25354371 | 5.97892656  |
| Pd | 9.87240672  | 9.24808470  | 6.03563386  |
| Pd | 9.58152710  | 6.41723446  | 5.91830382  |
| Pd | 9.80234378  | 9.13532414  | 8.89502347  |
| Pd | 7.24948792  | 10.14057633 | 8.88095746  |
| Pd | 5.44856195  | 8.19911552  | 5.37992428  |
| Bi | 7.93824273  | 7.81205787  | 10.30236337 |
| Bi | 4.75930847  | 6.49020748  | 7.34932840  |
| Bi | 8.52554964  | 4.36859703  | 7.29352239  |
| Bi | 5.07540202  | 9.94279989  | 7.35526804  |
| Bi | 9.18751659  | 11.33281888 | 7.52113468  |
| Bi | 11.36478151 | 7.61970629  | 7.42729725  |
| Bi | 8.04852640  | 8.07596660  | 4.48541757  |

**Pd<sub>11</sub>Bi<sub>8</sub>**

|    |             |             |             |
|----|-------------|-------------|-------------|
| Pd | 7.70250886  | 5.56402621  | 5.45641206  |
| Pd | 10.90591729 | 8.81869983  | 5.97210846  |
| Pd | 8.34570847  | 10.03485529 | 5.94339548  |
| Pd | 6.48315763  | 7.95056230  | 5.98676035  |
| Pd | 10.47089959 | 6.04627699  | 5.82335926  |
| Pd | 8.35617992  | 9.99801701  | 8.84867967  |
| Pd | 8.72478166  | 7.42235211  | 7.38650351  |
| Pd | 10.90682265 | 8.79756589  | 8.81033661  |
| Pd | 6.47348905  | 7.92136854  | 8.80078039  |
| Pd | 10.47180495 | 6.01688327  | 8.91995995  |
| Pd | 7.71325362  | 5.51848210  | 9.29172218  |
| Bi | 10.34763376 | 10.93161748 | 7.40347430  |
| Bi | 6.15071911  | 10.25893048 | 7.41728430  |
| Bi | 8.90125884  | 7.85598251  | 4.52798130  |
| Bi | 4.10719844  | 8.04594191  | 7.36245786  |
| Bi | 8.89975560  | 7.80616239  | 10.24468600 |
| Bi | 5.83488457  | 5.65992879  | 7.38443570  |
| Bi | 9.14355410  | 4.37852574  | 7.35467404  |
| Bi | 12.34223073 | 7.09643716  | 7.38050686  |

**Pd<sub>11</sub>Bi<sub>9</sub>**

|    |             |            |             |
|----|-------------|------------|-------------|
| Pd | 8.99027118  | 6.82434075 | 6.50367824  |
| Pd | 7.99006359  | 4.56307359 | 7.75489327  |
| Pd | 10.51128124 | 4.56695269 | 6.52252426  |
| Pd | 11.30283833 | 6.81603620 | 8.16246190  |
| Pd | 10.52084318 | 9.04939845 | 6.46685940  |
| Pd | 6.83886787  | 6.84619481 | 4.94644475  |
| Pd | 5.75946743  | 4.59190730 | 6.14906763  |
| Pd | 5.75462185  | 9.07871021 | 6.20906926  |
| Pd | 6.47401217  | 6.84034885 | 7.78887430  |
| Pd | 8.01603588  | 9.11005713 | 7.75207001  |
| Pd | 8.76487115  | 6.84409136 | 9.24448487  |
| Bi | 10.23910525 | 4.61011446 | 9.15229222  |
| Bi | 11.57641954 | 6.79166892 | 5.55280605  |
| Bi | 8.24729906  | 4.57279865 | 5.04221741  |
| Bi | 8.23281079  | 9.11724166 | 5.04255213  |
| Bi | 5.53715242  | 4.46952455 | 8.77660900  |
| Bi | 10.28549356 | 9.06147282 | 9.09920323  |
| Bi | 6.47670954  | 6.79782904 | 10.54401554 |
| Bi | 4.39148065  | 6.83868248 | 5.96474055  |
| Bi | 5.60954532  | 9.19744607 | 8.85419053  |



**Pd<sub>11</sub>Bi<sub>10</sub>**

|    |             |             |            |
|----|-------------|-------------|------------|
| Pd | 10.15908937 | 10.07205300 | 7.26810495 |
| Pd | 8.74514377  | 8.72871212  | 9.21290443 |
| Pd | 6.34191531  | 9.48487244  | 8.10076921 |
| Pd | 7.64441308  | 10.65289954 | 6.05634152 |
| Pd | 10.98023300 | 7.48859861  | 6.18430707 |
| Pd | 9.57412089  | 6.19893347  | 8.16913686 |
| Pd | 7.99710754  | 7.95733148  | 6.60343657 |
| Pd | 7.65733366  | 5.07261440  | 6.64892175 |
| Pd | 8.62408352  | 6.65247715  | 4.43977110 |
| Pd | 5.17719028  | 7.68120254  | 6.36138040 |
| Pd | 6.89010381  | 6.95051836  | 8.86805901 |
| Bi | 9.66643752  | 9.28571661  | 4.80603036 |
| Bi | 8.19979529  | 11.26924459 | 8.63186333 |
| Bi | 4.90368899  | 10.47847283 | 6.18092225 |
| Bi | 11.24476165 | 8.15762339  | 8.73718419 |
| Bi | 10.16910750 | 5.01870522  | 5.83695801 |
| Bi | 6.06050251  | 5.74316432  | 4.61366942 |
| Bi | 7.81557959  | 4.56355858  | 9.28704864 |
| Bi | 5.05224449  | 5.20628240  | 7.61078241 |
| Bi | 4.43182243  | 7.94022807  | 9.02892160 |
| Bi | 6.51325347  | 8.80509383  | 4.21524044 |

**Pd<sub>11</sub>Bi<sub>11</sub>**

|    |             |             |             |
|----|-------------|-------------|-------------|
| Pd | 6.62972085  | 7.31042130  | 6.06515907  |
| Pd | 5.46253395  | 7.98111542  | 8.81649306  |
| Pd | 7.44446207  | 8.43463103  | 10.76329019 |
| Pd | 7.67673158  | 5.15606328  | 7.75783253  |
| Pd | 8.14965572  | 7.84865734  | 8.16515629  |
| Pd | 9.30476613  | 6.02862173  | 9.87988105  |
| Pd | 6.50534417  | 9.96466638  | 7.18117432  |
| Pd | 9.19590272  | 6.46321703  | 5.96335100  |
| Pd | 8.52741587  | 10.41047724 | 8.95358930  |
| Pd | 8.86854878  | 9.21511380  | 5.88423473  |
| Pd | 10.85865518 | 7.46299115  | 7.85610263  |
| Bi | 4.24293606  | 8.63832226  | 6.44250161  |
| Bi | 5.95089181  | 10.43066844 | 9.73589187  |
| Bi | 4.92324482  | 5.61436060  | 7.36037543  |
| Bi | 6.64377030  | 5.96854060  | 10.11201442 |
| Bi | 7.17884301  | 4.88655605  | 5.14479952  |
| Bi | 10.36218269 | 4.83538701  | 7.71505667  |
| Bi | 8.36057260  | 11.76837111 | 6.59943791  |
| Bi | 11.19105293 | 8.04958439  | 5.24000439  |
| Bi | 6.55341145  | 9.46849666  | 4.47397343  |
| Bi | 10.04615741 | 8.56102063  | 10.17821406 |
| Bi | 10.94476579 | 10.24956721 | 7.45992651  |

**Pd<sub>11</sub>Bi<sub>12</sub>**

|    |             |             |             |
|----|-------------|-------------|-------------|
| Pd | 10.35288234 | 8.54583339  | 8.29473546  |
| Pd | 8.05339936  | 9.28161989  | 9.95241153  |
| Pd | 10.03852676 | 6.46568492  | 10.05542608 |
| Pd | 9.68859448  | 4.73123705  | 7.74335244  |
| Pd | 6.06494020  | 6.44254016  | 9.89983152  |
| Pd | 8.13141129  | 7.03277014  | 8.02183955  |
| Pd | 8.18013624  | 9.77369752  | 6.88703790  |
| Pd | 5.91247563  | 8.54530702  | 8.15321642  |
| Pd | 10.17893198 | 7.06633391  | 6.03132473  |
| Pd | 6.24127967  | 7.09779220  | 5.87293458  |
| Pd | 6.59140698  | 4.73642333  | 7.62289790  |
| Bi | 10.56790273 | 8.99281358  | 10.94369496 |
| Bi | 8.21330757  | 5.31467067  | 5.61734862  |
| Bi | 11.78318237 | 6.32816327  | 8.04527706  |
| Bi | 7.97951556  | 7.30025849  | 11.79228910 |
| Bi | 10.72382908 | 9.77270671  | 5.94770058  |
| Bi | 8.06194817  | 4.67155609  | 9.83590659  |
| Bi | 5.69747149  | 9.79928834  | 5.79790852  |
| Bi | 8.26971995  | 8.45960176  | 4.49569604  |
| Bi | 5.46554852  | 8.95774812  | 10.76331385 |
| Bi | 4.48961924  | 6.34813433  | 7.74627806  |
| Bi | 9.73244369  | 11.18331378 | 8.75661057  |
| Bi | 6.48509947  | 11.18910384 | 8.63797643  |

**Pd<sub>11</sub>Bi<sub>13</sub>**

|    |             |             |             |
|----|-------------|-------------|-------------|
| Pd | 11.59693331 | 6.74558364  | 7.60182540  |
| Pd | 9.04014324  | 7.57125290  | 4.61675725  |
| Pd | 8.17759004  | 5.26391975  | 6.10117075  |
| Pd | 9.46825553  | 5.27128100  | 8.63238605  |
| Pd | 6.00944640  | 6.69246493  | 7.13792131  |
| Pd | 8.76750358  | 10.49635938 | 7.36855432  |
| Pd | 6.85609020  | 9.00092691  | 5.67481877  |
| Pd | 10.88086966 | 9.11001027  | 6.00830740  |
| Pd | 8.54308434  | 7.56557694  | 10.12527383 |
| Pd | 6.67393196  | 9.07601811  | 8.72523466  |
| Pd | 10.69579323 | 9.03660437  | 9.06777235  |
| Bi | 11.62741608 | 6.89678357  | 4.74484412  |
| Bi | 13.10839667 | 9.01741422  | 7.66493298  |
| Bi | 10.70781757 | 4.50421563  | 6.35868564  |
| Bi | 6.48147216  | 6.64559454  | 4.48675445  |
| Bi | 6.94975350  | 4.47693287  | 8.37154040  |
| Bi | 8.91239339  | 10.30302698 | 4.60489326  |
| Bi | 11.32192043 | 11.34832566 | 7.59657872  |
| Bi | 5.96243896  | 6.85515987  | 9.99219082  |
| Bi | 11.12306171 | 6.68257572  | 10.25714834 |
| Bi | 8.61222431  | 10.30359935 | 10.13192062 |
| Bi | 4.44874301  | 8.93830057  | 7.08507129  |
| Bi | 8.79345084  | 7.68268931  | 7.37632118  |
| Bi | 6.19468105  | 11.30395142 | 7.12356662  |

**Pd<sub>11</sub>Bi<sub>14</sub>**

|    |             |             |             |
|----|-------------|-------------|-------------|
| Pd | 11.44677043 | 8.37697820  | 7.06193092  |
| Pd | 9.17152553  | 9.68053969  | 10.06231324 |
| Pd | 8.63345760  | 11.23321331 | 7.62118078  |
| Pd | 9.62383948  | 9.67855917  | 5.45668895  |
| Pd | 6.22053098  | 9.97849897  | 7.46113344  |
| Pd | 7.96552724  | 6.05556528  | 9.10425559  |
| Pd | 6.67964806  | 8.52821297  | 9.88186523  |
| Pd | 10.49999753 | 7.23606857  | 9.52163240  |
| Pd | 8.02846058  | 7.32286171  | 5.25246122  |
| Pd | 6.06471328  | 7.02538507  | 7.21100421  |
| Pd | 9.95853664  | 6.03471162  | 6.77259514  |
| Bi | 11.92981044 | 9.52386266  | 9.59919283  |
| Bi | 12.42244374 | 5.99644941  | 8.00089846  |
| Bi | 11.34393109 | 11.11679566 | 6.94792719  |
| Bi | 6.97326805  | 11.28946659 | 9.81376300  |
| Bi | 7.39087738  | 11.02183081 | 5.19599622  |
| Bi | 8.62755007  | 7.44247482  | 11.42287352 |
| Bi | 10.16275134 | 4.46452958  | 9.08323912  |
| Bi | 5.61627454  | 8.54116121  | 5.10623013  |
| Bi | 10.71003365 | 7.37553675  | 4.58587101  |
| Bi | 7.54533444  | 4.89007396  | 6.60590022  |
| Bi | 4.21667100  | 8.61705320  | 8.58749659  |
| Bi | 8.55629796  | 8.40803400  | 7.69034094  |
| Bi | 5.31392243  | 6.06154011  | 9.63618878  |
| Bi | 10.18700151 | 12.13784254 | 9.69191165  |

**Pd<sub>11</sub>Bi<sub>15</sub>**

|    |             |             |             |
|----|-------------|-------------|-------------|
| Pd | 9.29278688  | 7.07988720  | 10.44752748 |
| Pd | 8.79237588  | 5.32576359  | 8.06368485  |
| Pd | 11.47994651 | 7.05332491  | 7.88360113  |
| Pd | 6.77287046  | 8.12504027  | 9.96986506  |
| Pd | 10.40500731 | 9.59258680  | 9.66748284  |
| Pd | 6.25119016  | 6.35727396  | 7.80043052  |
| Pd | 9.11898478  | 7.13849137  | 5.31119707  |
| Pd | 10.03611667 | 9.94395466  | 6.32072836  |
| Pd | 6.41033322  | 7.36251127  | 5.24719276  |
| Pd | 6.48708768  | 9.38201676  | 6.95331177  |
| Pd | 7.91117234  | 10.56687495 | 9.11547743  |
| Bi | 7.19770863  | 5.35518619  | 10.24026102 |
| Bi | 12.02060137 | 7.62013176  | 10.54418609 |
| Bi | 10.97001398 | 4.95098300  | 9.59278993  |
| Bi | 12.45877994 | 9.61678693  | 7.85745225  |
| Bi | 7.51251837  | 4.97855764  | 5.73387368  |
| Bi | 8.47838814  | 9.42660863  | 11.55685079 |
| Bi | 10.80641841 | 5.05307026  | 6.14856566  |
| Bi | 11.67621667 | 7.95631428  | 5.28121493  |
| Bi | 4.19306776  | 7.90090788  | 6.95121222  |
| Bi | 10.26473605 | 11.89738384 | 8.29849988  |
| Bi | 5.13086958  | 10.09657937 | 9.14224663  |
| Bi | 7.81393632  | 11.68122174 | 6.50925797  |
| Bi | 8.04067194  | 9.39806984  | 4.41927212  |
| Bi | 8.73036609  | 8.08118758  | 7.92834371  |
| Bi | 4.37344588  | 6.95813132  | 9.78882701  |

**Pd<sub>12</sub>**

|    |            |            |            |
|----|------------|------------|------------|
| Pd | 6.29654272 | 8.10189637 | 5.79066588 |
| Pd | 6.28840998 | 9.01542677 | 8.30532778 |
| Pd | 4.99931418 | 6.78966333 | 7.94358111 |
| Pd | 8.52346307 | 6.81084373 | 5.42705149 |
| Pd | 8.47084614 | 4.65956514 | 6.86839382 |
| Pd | 8.44320744 | 8.96393040 | 6.86664970 |
| Pd | 7.60824628 | 6.80662940 | 7.94388324 |
| Pd | 4.13733215 | 8.93324737 | 6.86461718 |
| Pd | 4.08737570 | 6.78169689 | 5.42684550 |
| Pd | 4.16725307 | 4.63248469 | 6.86622397 |
| Pd | 6.31761219 | 4.58043094 | 8.30571231 |
| Pd | 6.31380430 | 5.49181339 | 5.79033628 |

**Pd<sub>12</sub>Bi**

|    |            |            |            |
|----|------------|------------|------------|
| Pd | 6.96691605 | 6.86500593 | 6.87292193 |
| Pd | 7.35295153 | 8.65831108 | 8.68878751 |
| Pd | 6.61961548 | 5.10211580 | 5.05888542 |
| Pd | 8.04059381 | 6.04657419 | 9.07408822 |
| Pd | 6.31257293 | 4.49010797 | 7.65242115 |
| Pd | 8.64359782 | 6.98214838 | 4.86984507 |
| Pd | 7.66717652 | 9.19925899 | 6.07958781 |
| Pd | 9.41516572 | 7.57327077 | 7.35138133 |
| Pd | 8.76806094 | 5.02787020 | 6.69623122 |
| Pd | 4.52801474 | 6.14902405 | 6.39719926 |
| Pd | 5.18715082 | 8.73666236 | 7.02820017 |
| Pd | 5.93784212 | 7.67344122 | 4.68051592 |
| Bi | 5.38891605 | 6.75019782 | 8.94045624 |

**Pd<sub>12</sub>Bi<sub>2</sub>**

|    |             |            |            |
|----|-------------|------------|------------|
| Pd | 8.20759158  | 6.91811399 | 7.66447581 |
| Pd | 9.44745910  | 9.18435843 | 7.57709845 |
| Pd | 6.89962539  | 9.09530954 | 7.11472710 |
| Pd | 6.48534604  | 9.46430438 | 4.62089165 |
| Pd | 8.79852146  | 8.53571172 | 5.18423547 |
| Pd | 10.58385008 | 7.10016078 | 6.46147252 |
| Pd | 6.80392601  | 6.95708601 | 5.32838868 |
| Pd | 9.21693570  | 4.73792167 | 6.75567349 |
| Pd | 7.12674536  | 4.42575344 | 5.01131182 |
| Pd | 6.74593317  | 4.74327105 | 7.58671786 |
| Pd | 4.82451170  | 5.55419146 | 5.88478444 |
| Pd | 4.60769162  | 8.29375754 | 6.02620358 |
| Bi | 9.20359063  | 6.01555403 | 4.49251579 |
| Bi | 5.53987615  | 6.99967095 | 8.08275088 |

**Pd<sub>12</sub>Bi<sub>3</sub>**

|    |            |            |            |
|----|------------|------------|------------|
| Pd | 7.27772602 | 6.83426788 | 4.45754875 |
| Pd | 4.52912085 | 6.46599028 | 7.96760301 |
| Pd | 4.58595164 | 7.43637732 | 5.45669919 |
| Pd | 6.52366128 | 4.91905722 | 8.36228094 |
| Pd | 8.03033032 | 4.53678746 | 6.21990311 |
| Pd | 6.78913846 | 7.57663032 | 9.31526224 |
| Pd | 6.34501008 | 9.30077815 | 5.39834327 |
| Pd | 4.79844574 | 8.95717056 | 7.59738135 |
| Pd | 7.05839313 | 7.19803513 | 6.89683457 |
| Pd | 8.87151596 | 5.93621927 | 8.39547751 |
| Pd | 8.88635909 | 8.95727143 | 5.54877554 |
| Pd | 9.29762756 | 8.47152312 | 8.15058391 |
| Bi | 5.48691704 | 5.05629851 | 5.84922652 |
| Bi | 7.17678711 | 9.88523529 | 7.85239383 |
| Bi | 9.66324321 | 6.54373249 | 5.92628997 |

**Pd<sub>12</sub>Bi<sub>4</sub>**

|    |             |            |            |
|----|-------------|------------|------------|
| Pd | 7.89921521  | 9.09694819 | 8.12687283 |
| Pd | 7.07113982  | 6.77213065 | 7.17544007 |
| Pd | 5.31347605  | 8.21511571 | 8.37205557 |
| Pd | 5.29092447  | 5.39583129 | 8.56192112 |
| Pd | 7.86350340  | 4.48465004 | 8.25706799 |
| Pd | 9.40447123  | 6.78506906 | 8.45011252 |
| Pd | 11.12165029 | 6.73468522 | 6.30518596 |
| Pd | 8.82299579  | 8.06640539 | 5.77831944 |
| Pd | 8.81397516  | 5.41291975 | 5.80098760 |
| Pd | 6.76706424  | 6.76412891 | 4.50029616 |
| Pd | 6.25746037  | 8.93879854 | 5.96573631 |
| Pd | 4.64000253  | 6.74838311 | 6.25190218 |
| Bi | 7.13365094  | 6.93760393 | 9.86424502 |
| Bi | 10.48293092 | 4.53838377 | 7.64441185 |
| Bi | 10.49066951 | 9.02178608 | 7.54951487 |
| Bi | 6.19715807  | 4.58532279 | 5.95389388 |

**Pd<sub>12</sub>Bi<sub>5</sub>**

|    |             |            |            |
|----|-------------|------------|------------|
| Pd | 7.32193295  | 6.84328636 | 9.62392292 |
| Pd | 8.77425963  | 5.28561092 | 7.85569703 |
| Pd | 7.25904243  | 4.85673438 | 5.55570135 |
| Pd | 6.85541332  | 7.00852262 | 7.03641903 |
| Pd | 4.72343217  | 5.68990048 | 6.17095436 |
| Pd | 4.71844612  | 6.92746835 | 8.61691617 |
| Pd | 4.69193419  | 8.35626203 | 6.28728206 |
| Pd | 10.71392382 | 7.03842532 | 6.95894190 |
| Pd | 8.72938517  | 8.62768654 | 8.06533610 |
| Pd | 8.67896731  | 7.13462731 | 5.14697937 |
| Pd | 6.16789565  | 7.13030740 | 4.47926759 |
| Pd | 7.21772298  | 9.32338718 | 5.80489100 |
| Bi | 6.12597365  | 9.25369369 | 8.36397447 |
| Bi | 10.02628564 | 6.87394644 | 9.53647764 |
| Bi | 6.17889207  | 4.64211377 | 8.15338339 |
| Bi | 9.94661427  | 4.86843178 | 5.52406089 |
| Bi | 9.91046163  | 9.35770797 | 5.82155124 |

**Pd<sub>12</sub>Bi<sub>6</sub>**

|    |             |             |             |
|----|-------------|-------------|-------------|
| Pd | 9.54787529  | 9.61511468  | 5.99661082  |
| Pd | 9.59096862  | 9.46837051  | 8.77474980  |
| Pd | 7.54701774  | 7.92978063  | 7.40028172  |
| Pd | 9.70222947  | 6.77787478  | 5.92366291  |
| Pd | 6.75831787  | 10.07275561 | 6.12734364  |
| Pd | 5.68467560  | 7.81543017  | 9.69579106  |
| Pd | 7.21809429  | 5.67607397  | 8.80154368  |
| Pd | 9.86625512  | 6.58568057  | 8.64478548  |
| Pd | 7.06940906  | 5.80988935  | 5.83108882  |
| Pd | 5.43206488  | 7.94620067  | 5.23580077  |
| Pd | 6.86942298  | 10.00441316 | 8.83532790  |
| Pd | 4.77789345  | 9.07924738  | 7.54787709  |
| Bi | 7.94124309  | 8.12226179  | 4.48193673  |
| Bi | 8.51833866  | 11.54070743 | 7.46986007  |
| Bi | 11.41319208 | 8.24702223  | 7.30254984  |
| Bi | 5.01141041  | 6.43751758  | 7.45485964  |
| Bi | 8.99762934  | 4.55723140  | 7.17700436  |
| Bi | 8.22017391  | 7.79052910  | 10.30767565 |

**Pd<sub>12</sub>Bi<sub>7</sub>**

|    |             |            |            |
|----|-------------|------------|------------|
| Pd | 10.74335359 | 8.63415130 | 7.24712630 |
| Pd | 8.64642487  | 6.76102106 | 7.47168361 |
| Pd | 8.15836707  | 9.04149694 | 6.18754344 |
| Pd | 6.43678945  | 8.05589434 | 8.18869713 |
| Pd | 6.69287075  | 6.75628967 | 5.59098546 |
| Pd | 8.15773138  | 4.47154201 | 6.20052545 |
| Pd | 10.74625716 | 4.90076019 | 7.25488001 |
| Pd | 6.44068951  | 5.46849995 | 8.19972706 |
| Pd | 11.66409515 | 6.75446470 | 5.34390417 |
| Pd | 9.03062413  | 6.74655652 | 4.65879280 |
| Pd | 10.36240152 | 6.76571189 | 9.40581137 |
| Pd | 4.38389537  | 6.76142660 | 6.96844318 |
| Bi | 8.78655228  | 9.03825256 | 8.96058727 |
| Bi | 5.47548379  | 9.01116197 | 5.93083827 |
| Bi | 10.35803757 | 8.98872166 | 4.65551659 |
| Bi | 12.50558122 | 6.77328212 | 7.83340515 |
| Bi | 8.79392289  | 4.48181589 | 8.96585652 |
| Bi | 5.47369697  | 4.50616227 | 5.94840698 |
| Bi | 10.36173146 | 4.50624338 | 4.67080559 |

**Pd<sub>12</sub>Bi<sub>8</sub>**

|    |             |            |            |
|----|-------------|------------|------------|
| Pd | 10.31053429 | 9.21959348 | 6.48773386 |
| Pd | 9.32881308  | 7.01688533 | 4.40627735 |
| Pd | 7.81168588  | 9.17162750 | 7.76765415 |
| Pd | 5.54775902  | 9.23828478 | 6.19385916 |
| Pd | 6.87463194  | 6.95936509 | 5.66457891 |
| Pd | 9.04654325  | 6.96686108 | 7.07056798 |
| Pd | 10.38053304 | 4.75532184 | 6.44083851 |
| Pd | 11.32688115 | 6.97050477 | 8.41703052 |
| Pd | 6.47306525  | 6.92117587 | 8.41780211 |
| Pd | 7.88106719  | 4.72047036 | 7.71658651 |
| Pd | 8.77571241  | 6.91427790 | 9.71615476 |
| Pd | 5.61993508  | 4.63560853 | 6.13549001 |
| Bi | 8.02771036  | 9.32698500 | 5.06679887 |
| Bi | 10.04790896 | 9.18446386 | 9.17254300 |
| Bi | 11.60492636 | 7.01311647 | 5.79070484 |
| Bi | 8.10623961  | 4.64090718 | 5.01327357 |
| Bi | 4.30372121  | 6.91401366 | 6.69799138 |
| Bi | 5.41206737  | 9.27714154 | 8.82441428 |
| Bi | 10.11821644 | 4.70115324 | 9.12198975 |
| Bi | 5.48759063  | 4.52436472 | 8.76423048 |

**Pd<sub>12</sub>Bi<sub>9</sub>**

|    |             |             |             |
|----|-------------|-------------|-------------|
| Pd | 8.90452290  | 7.52095073  | 7.78689494  |
| Pd | 7.63396628  | 5.96390179  | 9.51847714  |
| Pd | 10.47297617 | 5.88806509  | 9.22125493  |
| Pd | 10.48616723 | 6.10519215  | 6.14644947  |
| Pd | 7.63420670  | 8.81747725  | 9.72895438  |
| Pd | 10.47967588 | 8.91487639  | 9.44683856  |
| Pd | 10.48918049 | 9.13084644  | 6.35125792  |
| Pd | 7.63534469  | 6.21202768  | 5.85550342  |
| Pd | 6.19083605  | 10.40038609 | 7.96698809  |
| Pd | 7.64946537  | 9.06961510  | 6.03618836  |
| Pd | 6.20423547  | 7.52352019  | 7.78457447  |
| Pd | 6.18700535  | 4.61972752  | 7.60088383  |
| Bi | 9.26690025  | 7.27144243  | 11.14869075 |
| Bi | 11.99845834 | 7.51291177  | 7.79734483  |
| Bi | 8.89585175  | 10.55097761 | 8.00182624  |
| Bi | 8.88807816  | 4.46488362  | 7.57102923  |
| Bi | 5.01707260  | 9.19595450  | 5.92754691  |
| Bi | 9.28573316  | 7.73618450  | 4.42846303  |
| Bi | 4.99354348  | 8.94181817  | 9.81359692  |
| Bi | 4.99298250  | 5.84193498  | 9.61911376  |
| Bi | 4.98794970  | 6.09127799  | 5.77093875  |

**Pd<sub>12</sub>Bi<sub>10</sub>**

|    |             |             |             |
|----|-------------|-------------|-------------|
| Pd | 5.98719613  | 9.06838572  | 5.49187480  |
| Pd | 6.54136328  | 5.22485087  | 7.87550576  |
| Pd | 8.05715529  | 6.60686995  | 9.65305657  |
| Pd | 6.41158873  | 8.83354857  | 9.37514968  |
| Pd | 4.94520763  | 7.42054703  | 7.54507112  |
| Pd | 8.64635897  | 5.35216817  | 6.09950302  |
| Pd | 10.23185132 | 6.67532218  | 7.90038094  |
| Pd | 7.75399689  | 7.77274682  | 7.15961968  |
| Pd | 10.15889365 | 8.97422396  | 6.23872206  |
| Pd | 8.41774638  | 7.66605787  | 4.50169397  |
| Pd | 7.33889011  | 10.53664118 | 7.43013535  |
| Pd | 9.20041267  | 9.04553635  | 9.06021080  |
| Bi | 6.21076877  | 6.36418733  | 5.39669955  |
| Bi | 5.42408349  | 6.43526004  | 9.99677113  |
| Bi | 4.74498728  | 10.04208824 | 7.68416874  |
| Bi | 8.99166817  | 4.37897696  | 8.57677635  |
| Bi | 10.81238499 | 6.60794052  | 5.26895435  |
| Bi | 8.28426075  | 10.30696512 | 4.93464956  |
| Bi | 11.88458076 | 8.83206257  | 8.36522351  |
| Bi | 9.99528178  | 11.32500819 | 7.74642499  |
| Bi | 7.76830644  | 11.04436047 | 10.04140682 |
| Bi | 10.45472711 | 7.25063084  | 10.60552244 |

**Pd<sub>12</sub>Bi<sub>11</sub>**

|    |             |             |             |
|----|-------------|-------------|-------------|
| Pd | 7.53059141  | 6.44802855  | 9.41643568  |
| Pd | 7.29510783  | 6.36931188  | 6.70172458  |
| Pd | 5.55635233  | 8.13232026  | 8.20555883  |
| Pd | 6.50856697  | 10.05171414 | 9.83653001  |
| Pd | 8.28698201  | 8.39091008  | 11.05229370 |
| Pd | 6.63552892  | 9.32408065  | 5.98008531  |
| Pd | 9.76325203  | 8.11358818  | 5.87268552  |
| Pd | 10.48687412 | 10.28306023 | 7.45796711  |
| Pd | 8.31046612  | 8.68427194  | 8.15586804  |
| Pd | 7.69971873  | 11.33020312 | 7.59471957  |
| Pd | 9.97844804  | 6.35668949  | 8.05686603  |
| Pd | 10.66674759 | 8.45400594  | 9.65634951  |
| Bi | 8.18443582  | 4.17267670  | 8.12477572  |
| Bi | 5.21841894  | 5.37478648  | 8.39594002  |
| Bi | 4.85300175  | 7.20956357  | 5.79406907  |
| Bi | 5.61673315  | 7.67789794  | 10.86705239 |
| Bi | 5.08761793  | 10.71149622 | 7.69542961  |
| Bi | 9.60490298  | 5.40420650  | 5.55831460  |
| Bi | 11.95792366 | 8.03161515  | 7.38409516  |
| Bi | 7.61248058  | 7.44782537  | 4.20375830  |
| Bi | 8.89782578  | 10.57661553 | 5.33960871  |
| Bi | 9.81640450  | 6.15181336  | 10.75440202 |
| Bi | 9.15613488  | 10.68970123 | 9.76820913  |

**Pd<sub>12</sub>Bi<sub>12</sub>**

|    |             |             |             |
|----|-------------|-------------|-------------|
| Pd | 8.25452741  | 9.70378957  | 8.97843663  |
| Pd | 9.68382587  | 7.33627003  | 9.06218591  |
| Pd | 10.76177769 | 9.52797052  | 10.39098768 |
| Pd | 5.84633567  | 8.77074422  | 7.65896502  |
| Pd | 11.73242487 | 8.82502028  | 7.91767063  |
| Pd | 7.01884498  | 7.06397401  | 9.57607452  |
| Pd | 11.08578389 | 5.10361029  | 8.55813522  |
| Pd | 6.52237422  | 5.00904237  | 7.97663470  |
| Pd | 9.29648831  | 9.39941216  | 6.51878161  |
| Pd | 7.91216531  | 7.07206032  | 6.96528045  |
| Pd | 6.84059585  | 8.88947795  | 5.12400229  |
| Pd | 10.56519025 | 6.68922553  | 6.51235522  |
| Bi | 7.10777614  | 10.94912790 | 6.86864667  |
| Bi | 10.44960436 | 11.11870761 | 8.23764111  |
| Bi | 8.57946547  | 8.35349992  | 11.37241559 |
| Bi | 12.22390226 | 7.22101295  | 10.06013201 |
| Bi | 4.47201699  | 6.69150708  | 8.89627412  |
| Bi | 5.78980865  | 9.46886751  | 10.20770084 |
| Bi | 8.63725841  | 4.92516824  | 9.83652557  |
| Bi | 8.96413052  | 4.54782779  | 6.76507874  |
| Bi | 9.00275879  | 7.50249726  | 4.46121197  |
| Bi | 5.41108640  | 6.68172901  | 5.97328471  |
| Bi | 13.11694127 | 6.50958838  | 7.22425582  |
| Bi | 11.71220525 | 8.88888816  | 5.26873082  |

**Pd<sub>12</sub>Bi<sub>13</sub>**

|    |             |             |             |
|----|-------------|-------------|-------------|
| Pd | 9.96914079  | 5.82048265  | 8.14504743  |
| Pd | 7.16536279  | 5.93133375  | 6.87630418  |
| Pd | 9.09854269  | 6.88226461  | 5.23174062  |
| Pd | 10.85853262 | 8.28217999  | 6.74884635  |
| Pd | 10.19912997 | 9.44255973  | 9.35379469  |
| Pd | 8.44201595  | 8.06733051  | 7.86180948  |
| Pd | 9.65004856  | 10.67024309 | 6.99020680  |
| Pd | 6.93413629  | 10.33348023 | 7.88751350  |
| Pd | 7.56195410  | 9.42294786  | 10.30179128 |
| Pd | 6.53695977  | 7.05935880  | 9.38199730  |
| Pd | 5.48420957  | 8.03251210  | 6.99481497  |
| Pd | 7.61074424  | 9.13539415  | 5.49370318  |
| Bi | 7.70477981  | 4.54602123  | 9.16261543  |
| Bi | 11.58006830 | 5.89909328  | 5.91789432  |
| Bi | 9.03839939  | 4.23513559  | 6.08987786  |
| Bi | 12.22766635 | 10.30259398 | 7.85515157  |
| Bi | 9.13001049  | 7.17794371  | 10.42401255 |
| Bi | 12.11129232 | 7.40532390  | 9.03300313  |
| Bi | 7.68927999  | 11.90035754 | 5.66920269  |
| Bi | 4.98112599  | 9.25854754  | 9.38237134  |
| Bi | 8.71778560  | 11.67098679 | 9.35484200  |
| Bi | 6.36977243  | 6.99766789  | 4.55614979  |
| Bi | 4.78171843  | 5.62129655  | 8.03786257  |
| Bi | 5.12891766  | 10.37392767 | 5.77379920  |
| Bi | 10.03343075 | 9.48139188  | 4.49560022  |

**Pd<sub>12</sub>Bi<sub>14</sub>**

|    |             |             |             |
|----|-------------|-------------|-------------|
| Pd | 9.84077518  | 7.82791290  | 5.83849746  |
| Pd | 5.61318481  | 8.40128298  | 6.37780095  |
| Pd | 6.34191685  | 9.92904381  | 9.37035646  |
| Pd | 10.86762870 | 7.82802632  | 8.70252789  |
| Pd | 9.47680553  | 5.59882451  | 7.79435599  |
| Pd | 6.98186182  | 5.91415699  | 6.60972733  |
| Pd | 5.96546574  | 7.01750470  | 9.47814092  |
| Pd | 8.57323178  | 6.67973065  | 10.27906831 |
| Pd | 7.86909160  | 9.87622104  | 5.71200515  |
| Pd | 9.79429016  | 10.42980689 | 7.49382361  |
| Pd | 9.04546970  | 9.69587828  | 10.06442047 |
| Pd | 12.09639523 | 9.14809321  | 6.69151458  |
| Bi | 11.92990260 | 6.34908604  | 6.66043543  |
| Bi | 7.39238396  | 7.53251048  | 4.42518214  |
| Bi | 4.00973820  | 8.78917385  | 8.60408146  |
| Bi | 9.28465843  | 5.17580487  | 5.15289803  |
| Bi | 4.41201245  | 6.09150214  | 7.35613518  |
| Bi | 7.01483650  | 8.46964471  | 11.53597148 |
| Bi | 10.99745281 | 5.44089091  | 10.00105520 |
| Bi | 10.42588603 | 10.25983424 | 4.91450807  |
| Bi | 11.70419048 | 10.28287534 | 9.27468920  |
| Bi | 7.21647963  | 4.63702885  | 9.06699725  |
| Bi | 7.93178566  | 8.16724247  | 7.95370613  |
| Bi | 10.69860605 | 8.07323091  | 11.49056764 |
| Bi | 8.04231410  | 11.94538283 | 8.74515254  |
| Bi | 5.74267158  | 11.08226529 | 6.85959927  |

**Pd<sub>12</sub>Bi<sub>15</sub>**

|    |             |             |             |
|----|-------------|-------------|-------------|
| Pd | 7.23945284  | 8.84718241  | 10.38020048 |
| Pd | 11.07245822 | 9.92390338  | 8.96981970  |
| Pd | 10.27815389 | 9.80922730  | 6.04088515  |
| Pd | 6.17653462  | 7.34304021  | 7.52202546  |
| Pd | 7.97399135  | 6.18467468  | 9.43701983  |
| Pd | 10.41292096 | 7.32692728  | 10.07990826 |
| Pd | 11.16763704 | 7.27000064  | 7.26408566  |
| Pd | 8.76655741  | 6.08573442  | 6.60899509  |
| Pd | 8.62875689  | 11.10763822 | 9.40493271  |
| Pd | 6.77530058  | 10.33135486 | 7.38168465  |
| Pd | 7.87032568  | 8.54287084  | 5.38726335  |
| Pd | 4.94381124  | 9.29412772  | 8.94162241  |
| Bi | 5.39864160  | 6.89972889  | 10.11175328 |
| Bi | 9.75645124  | 9.68536342  | 11.41410634 |
| Bi | 12.85467952 | 9.48023209  | 6.88932162  |
| Bi | 8.43170179  | 6.92854361  | 11.94856354 |
| Bi | 12.94307568 | 7.87852094  | 9.32071208  |
| Bi | 10.25206279 | 7.40042968  | 4.73317347  |
| Bi | 6.62313376  | 4.66599656  | 7.64875991  |
| Bi | 6.07142039  | 11.28548042 | 10.32832522 |
| Bi | 5.18730542  | 9.02581312  | 5.72320971  |
| Bi | 10.33002933 | 5.04314201  | 8.57570331  |
| Bi | 7.12331253  | 12.90459010 | 7.96748447  |
| Bi | 8.82690266  | 8.54359078  | 8.05666020  |
| Bi | 6.54751900  | 6.17605255  | 4.98097710  |
| Bi | 8.14478493  | 11.29231984 | 5.24716464  |
| Bi | 10.26828665 | 12.13259210 | 7.53112865  |

**Pd<sub>13</sub>**

|    |             |            |            |
|----|-------------|------------|------------|
| Pd | 7.75043928  | 8.40936046 | 9.30788700 |
| Pd | 8.03522911  | 6.28658039 | 7.92055093 |
| Pd | 8.01495636  | 4.65063338 | 5.98293327 |
| Pd | 9.51240829  | 8.32992234 | 7.40526885 |
| Pd | 8.41776454  | 7.17790278 | 5.27033988 |
| Pd | 5.66005180  | 7.17616499 | 8.50306349 |
| Pd | 6.06392993  | 4.65003557 | 7.78940951 |
| Pd | 7.03849990  | 8.76342592 | 6.88708047 |
| Pd | 4.56594303  | 8.32989454 | 6.36984248 |
| Pd | 3.87209426  | 5.94601413 | 7.17759984 |
| Pd | 6.32805282  | 8.41086192 | 4.46765133 |
| Pd | 6.04262947  | 6.28790112 | 5.85316923 |
| Pd | 10.20693281 | 5.94665364 | 6.59566579 |

**Pd<sub>13</sub>Bi**

|    |            |            |            |
|----|------------|------------|------------|
| Pd | 6.87816458 | 6.76996459 | 6.93709860 |
| Pd | 8.60794993 | 7.69397561 | 8.71397413 |
| Pd | 6.74999229 | 4.95564302 | 5.14095995 |
| Pd | 4.96584492 | 6.48250267 | 8.67923076 |
| Pd | 4.43892198 | 5.57569605 | 6.31796896 |
| Pd | 8.53955944 | 5.21146138 | 8.29435732 |
| Pd | 9.13717216 | 5.58339240 | 5.91106902 |
| Pd | 6.26111729 | 4.32127341 | 7.62307236 |
| Pd | 6.84208747 | 9.10109920 | 5.88800961 |
| Pd | 7.96233931 | 7.21851853 | 4.31907118 |
| Pd | 9.20698603 | 8.15812656 | 6.34784289 |
| Pd | 6.36060308 | 8.83548673 | 8.44465260 |
| Pd | 4.50224854 | 8.19609066 | 6.80319575 |
| Bi | 5.35115560 | 7.24971256 | 4.48051386 |

**Pd<sub>13</sub>Bi<sub>2</sub>**

|    |             |            |            |
|----|-------------|------------|------------|
| Pd | 8.04966700  | 7.14150200 | 7.13004185 |
| Pd | 6.27775820  | 5.78394532 | 5.76952047 |
| Pd | 6.28255580  | 8.50320075 | 8.48969334 |
| Pd | 9.82157580  | 8.49905868 | 5.76952047 |
| Pd | 9.81677820  | 5.77980325 | 8.48969334 |
| Pd | 9.82028785  | 8.50085834 | 8.48872363 |
| Pd | 9.81672990  | 5.77778934 | 5.77309985 |
| Pd | 6.27904615  | 5.78214566 | 8.48872363 |
| Pd | 6.28260410  | 8.50521466 | 5.77309985 |
| Pd | 8.04966700  | 7.14150200 | 9.79940462 |
| Pd | 8.04966700  | 7.14150200 | 4.46142063 |
| Pd | 8.05478659  | 9.81405201 | 7.12982795 |
| Pd | 8.04454741  | 4.46895199 | 7.12982795 |
| Bi | 11.62547398 | 7.13870253 | 7.13051245 |
| Bi | 4.47386002  | 7.14430147 | 7.13051245 |

**Pd<sub>13</sub>Bi<sub>3</sub>**

|    |             |            |            |
|----|-------------|------------|------------|
| Pd | 10.07480759 | 7.94644822 | 5.03227920 |
| Pd | 7.75885015  | 9.18169743 | 5.61389118 |
| Pd | 7.95832911  | 6.53633185 | 4.49263741 |
| Pd | 5.62650238  | 7.82221637 | 4.58475520 |
| Pd | 7.28565126  | 9.43825437 | 8.47648788 |
| Pd | 7.02932792  | 7.06883021 | 6.80083506 |
| Pd | 4.29406320  | 6.73901337 | 6.76555303 |
| Pd | 5.62314233  | 5.25820393 | 5.10678305 |
| Pd | 9.63259092  | 6.09860989 | 6.81079959 |
| Pd | 8.50271438  | 4.41339368 | 8.49848838 |
| Pd | 8.26365672  | 6.97077163 | 9.03367592 |
| Pd | 6.00428184  | 5.01997950 | 7.85078014 |
| Pd | 5.61077853  | 7.47171059 | 8.94968140 |
| Bi | 7.86081511  | 4.29746546 | 5.97109806 |
| Bi | 9.60594330  | 8.72533438 | 7.50575815 |
| Bi | 5.23371180  | 9.22299116 | 6.81663480 |

**Pd<sub>13</sub>Bi<sub>4</sub>**

|    |             |            |            |
|----|-------------|------------|------------|
| Pd | 5.23909246  | 6.91393057 | 8.69751774 |
| Pd | 6.88856218  | 6.93744343 | 6.62067132 |
| Pd | 4.30587347  | 6.94861689 | 6.08212016 |
| Pd | 6.08491827  | 8.28667029 | 4.51465813 |
| Pd | 8.11506545  | 4.62763189 | 6.00706875 |
| Pd | 8.44360076  | 6.95161499 | 4.62016230 |
| Pd | 6.07818630  | 5.61281206 | 4.50950092 |
| Pd | 7.59310847  | 8.34535526 | 8.70598936 |
| Pd | 8.09935243  | 9.26348078 | 6.03675257 |
| Pd | 9.37903824  | 6.94076076 | 7.38771761 |
| Pd | 7.60693961  | 5.49713549 | 8.68538701 |
| Pd | 10.57576785 | 8.28501856 | 5.53971103 |
| Pd | 10.58230092 | 5.61975210 | 5.52312574 |
| Bi | 5.55835602  | 9.20837687 | 7.03808758 |
| Bi | 5.56885177  | 4.65827910 | 7.02034888 |
| Bi | 9.97559765  | 4.43070134 | 7.83709800 |
| Bi | 9.95474385  | 9.45308264 | 7.86387840 |

**Pd<sub>13</sub>Bi<sub>5</sub>**

|    |             |             |            |
|----|-------------|-------------|------------|
| Pd | 7.88697882  | 6.24068827  | 8.98070413 |
| Pd | 8.79067965  | 8.83594905  | 8.35885964 |
| Pd | 7.01292791  | 9.93786703  | 6.56759725 |
| Pd | 10.99771717 | 8.40764623  | 6.77218052 |
| Pd | 9.36249515  | 5.96685019  | 6.78486984 |
| Pd | 11.94682199 | 5.91867208  | 6.91414149 |
| Pd | 8.80068146  | 8.60317254  | 5.10701406 |
| Pd | 5.26623184  | 6.10583124  | 8.23046638 |
| Pd | 7.16303574  | 7.33894376  | 6.73377470 |
| Pd | 4.73054564  | 8.50543172  | 6.74589645 |
| Pd | 6.24110868  | 8.28246652  | 4.48407497 |
| Pd | 7.06363172  | 4.72535564  | 6.72692327 |
| Pd | 8.01057137  | 6.14559754  | 4.47150727 |
| Bi | 10.52950677 | 6.95168762  | 9.02173159 |
| Bi | 6.21263828  | 8.51527280  | 8.98875827 |
| Bi | 9.60476822  | 10.65677200 | 6.60820579 |
| Bi | 10.66686594 | 6.77304449  | 4.61999534 |
| Bi | 5.13480266  | 6.08226327  | 5.50620752 |

**Pd<sub>13</sub>Bi<sub>6</sub>**

|    |             |            |            |
|----|-------------|------------|------------|
| Pd | 8.47896706  | 8.38205046 | 9.04255752 |
| Pd | 10.58219137 | 6.87319889 | 5.33149926 |
| Pd | 8.42971968  | 6.97920134 | 6.78532837 |
| Pd | 7.37841626  | 9.54799333 | 6.77580419 |
| Pd | 8.43758119  | 8.35348759 | 4.51328987 |
| Pd | 6.23535007  | 7.05654274 | 5.42631982 |
| Pd | 7.13970957  | 4.52134999 | 6.81652309 |
| Pd | 8.34387564  | 5.59665207 | 9.05891573 |
| Pd | 4.59962942  | 5.51975960 | 6.81508292 |
| Pd | 8.31761037  | 5.55930710 | 4.53873748 |
| Pd | 6.25557614  | 7.08032174 | 8.16098044 |
| Pd | 10.60860724 | 6.88606340 | 8.11523155 |
| Pd | 4.76258251  | 8.76495558 | 6.80064041 |
| Bi | 10.02456652 | 9.15474890 | 6.77282874 |
| Bi | 6.00887240  | 9.51331386 | 4.51993369 |
| Bi | 6.05688482  | 9.53999685 | 9.05949995 |
| Bi | 9.81218534  | 4.66274739 | 6.79797745 |
| Bi | 5.79243998  | 4.61604515 | 4.55517721 |
| Bi | 5.80864492  | 4.66692801 | 9.08593939 |

**Pd<sub>13</sub>Bi<sub>7</sub>**

|    |             |            |            |
|----|-------------|------------|------------|
| Pd | 6.04062431  | 5.30000058 | 6.85804213 |
| Pd | 8.01013259  | 6.92275049 | 8.16075811 |
| Pd | 8.67124705  | 4.48299535 | 6.85017651 |
| Pd | 9.99199829  | 5.46701109 | 4.67911522 |
| Pd | 9.99963035  | 5.48075088 | 8.99049907 |
| Pd | 10.40570432 | 6.95305560 | 6.83507343 |
| Pd | 8.63003396  | 9.33055230 | 6.80346074 |
| Pd | 6.01732219  | 8.57381102 | 6.79610038 |
| Pd | 9.97801702  | 8.37547046 | 4.65348368 |
| Pd | 9.96294778  | 8.41814415 | 8.99073121 |
| Pd | 5.54509293  | 6.88243140 | 4.67295655 |
| Pd | 8.00771306  | 6.89582493 | 5.49962501 |
| Pd | 5.54408615  | 6.95955153 | 8.98001157 |
| Bi | 7.27178823  | 4.60920200 | 9.15402476 |
| Bi | 11.31732877 | 4.52202634 | 6.83070364 |
| Bi | 7.25623183  | 4.55252536 | 4.56834108 |
| Bi | 3.96995073  | 6.93466200 | 6.82451766 |
| Bi | 7.24236423  | 9.24632681 | 9.11527019 |
| Bi | 7.26264601  | 9.18815430 | 4.47424041 |
| Bi | 11.25924397 | 9.41076111 | 6.81876866 |

**Pd<sub>13</sub>Bi<sub>8</sub>**

|    |             |             |            |
|----|-------------|-------------|------------|
| Pd | 10.84124778 | 5.68932203  | 5.68582928 |
| Pd | 9.73130999  | 8.32853965  | 4.59315626 |
| Pd | 8.39710395  | 4.98664397  | 6.93792059 |
| Pd | 6.02362181  | 5.54356555  | 5.56727696 |
| Pd | 7.25406788  | 7.89223705  | 5.67871416 |
| Pd | 6.99059294  | 6.81488429  | 8.28594577 |
| Pd | 9.35602460  | 7.42924417  | 7.09728229 |
| Pd | 7.97837914  | 9.32885389  | 8.38233230 |
| Pd | 10.61216583 | 9.73016029  | 7.28735359 |
| Pd | 5.80894774  | 9.89559023  | 6.71861082 |
| Pd | 11.72829502 | 7.02588693  | 8.26107822 |
| Pd | 9.25226464  | 6.20590055  | 9.46664541 |
| Pd | 4.36278187  | 6.54155062  | 7.92890256 |
| Bi | 6.00609333  | 4.40908211  | 7.94318939 |
| Bi | 4.57302402  | 7.77904507  | 5.65250280 |
| Bi | 8.51635072  | 5.85772569  | 4.37988657 |
| Bi | 10.75848547 | 4.54952104  | 8.09782654 |
| Bi | 12.04935168 | 8.03147477  | 5.83745347 |
| Bi | 8.40726250  | 10.32297165 | 5.93502821 |
| Bi | 10.21008976 | 8.66643100  | 9.72315750 |
| Bi | 5.43137170  | 8.78475010  | 9.06626080 |

**Pd<sub>13</sub>Bi<sub>9</sub>**

|    |             |             |             |
|----|-------------|-------------|-------------|
| Pd | 8.68299156  | 5.77344640  | 6.34074867  |
| Pd | 9.76214873  | 4.70152600  | 8.59220812  |
| Pd | 8.05150718  | 6.40777382  | 9.83838705  |
| Pd | 7.21220608  | 7.58731055  | 7.60518777  |
| Pd | 5.89644556  | 8.97275454  | 5.73386047  |
| Pd | 5.86949672  | 5.90581861  | 6.04238626  |
| Pd | 5.34679979  | 9.22458684  | 8.67704693  |
| Pd | 5.31292264  | 6.31090233  | 9.01882349  |
| Pd | 10.33565325 | 7.32264243  | 4.89413978  |
| Pd | 9.85202157  | 7.63329666  | 8.07128457  |
| Pd | 8.69426225  | 9.11616159  | 6.02963191  |
| Pd | 8.08588850  | 9.25795081  | 9.46288163  |
| Pd | 9.76756452  | 10.73185661 | 7.91190913  |
| Bi | 7.06225537  | 4.52406817  | 8.07162386  |
| Bi | 4.08272510  | 7.57030806  | 7.04208386  |
| Bi | 6.21163479  | 8.00077341  | 10.86664700 |
| Bi | 7.56185795  | 7.28083827  | 4.43225331  |
| Bi | 11.35831056 | 5.73083332  | 6.75382314  |
| Bi | 11.37598913 | 9.23426331  | 6.42402981  |
| Bi | 10.67221289 | 9.42890679  | 10.02270056 |
| Bi | 10.62168178 | 6.39423593  | 10.43208907 |
| Bi | 7.08343063  | 10.77794956 | 7.38302760  |

**Pd<sub>13</sub>Bi<sub>10</sub>**

|    |             |             |             |
|----|-------------|-------------|-------------|
| Pd | 5.95332764  | 8.85490220  | 5.58333715  |
| Pd | 6.68042796  | 9.71847595  | 10.03560860 |
| Pd | 8.14196274  | 7.45774900  | 10.15259645 |
| Pd | 6.29233608  | 6.14472215  | 8.39021383  |
| Pd | 4.94387983  | 8.53090123  | 8.24106765  |
| Pd | 8.12101506  | 4.78241503  | 9.87359282  |
| Pd | 8.76226397  | 10.78372074 | 8.65848233  |
| Pd | 10.34382199 | 8.56745744  | 8.85422589  |
| Pd | 7.74875969  | 8.41288586  | 7.60667457  |
| Pd | 10.14239324 | 8.29915369  | 6.11314114  |
| Pd | 7.19826242  | 6.28131372  | 5.81870968  |
| Pd | 9.21139783  | 6.16560469  | 7.83316393  |
| Pd | 8.44642617  | 10.47277331 | 5.90164016  |
| Bi | 6.26819189  | 10.73873935 | 7.52129572  |
| Bi | 5.49804415  | 7.38651931  | 10.59683327 |
| Bi | 4.62940500  | 6.68134533  | 6.39012017  |
| Bi | 9.21826140  | 9.69433003  | 11.05211911 |
| Bi | 10.88901337 | 10.61479340 | 7.15333486  |
| Bi | 8.19899690  | 8.29513721  | 4.31679531  |
| Bi | 11.89503750 | 6.75097471  | 7.51167491  |
| Bi | 9.90877225  | 5.63676344  | 5.29556021  |
| Bi | 7.63801769  | 4.05340891  | 7.33204974  |
| Bi | 10.46822622 | 6.10358465  | 10.25613400 |

**Pd<sub>13</sub>Bi<sub>11</sub>**

|    |             |             |             |
|----|-------------|-------------|-------------|
| Pd | 8.48771618  | 9.70558143  | 7.58551042  |
| Pd | 7.32533590  | 8.11024435  | 5.55048877  |
| Pd | 6.56976464  | 5.49432697  | 6.10528628  |
| Pd | 5.70162084  | 8.97077595  | 7.82759008  |
| Pd | 7.79020829  | 7.08082899  | 8.07055508  |
| Pd | 5.12283063  | 6.38381535  | 8.48368097  |
| Pd | 9.94722283  | 7.44406861  | 6.49593062  |
| Pd | 11.13551239 | 9.97592188  | 7.21190904  |
| Pd | 9.48284869  | 5.56440609  | 9.44150189  |
| Pd | 8.09527353  | 8.78044443  | 10.17877610 |
| Pd | 9.12553306  | 4.78439225  | 6.89952320  |
| Pd | 10.55836643 | 8.04640990  | 9.10868979  |
| Pd | 7.17979547  | 6.28423978  | 10.66549661 |
| Bi | 9.53465066  | 9.68996203  | 5.04983984  |
| Bi | 8.73470144  | 6.02066824  | 4.59190898  |
| Bi | 6.56669206  | 10.72973893 | 5.97991456  |
| Bi | 4.73570271  | 7.36509275  | 5.98717126  |
| Bi | 6.82839246  | 11.08065881 | 9.21641777  |
| Bi | 5.43513719  | 8.25744906  | 10.39415301 |
| Bi | 11.54919733 | 5.18215491  | 7.90515296  |
| Bi | 9.72956821  | 7.12873567  | 11.52381065 |
| Bi | 12.59654702 | 7.82069189  | 7.21854915  |
| Bi | 10.04730575 | 10.60896229 | 9.63302181  |
| Bi | 7.02231351  | 4.51784486  | 8.59270535  |

**Pd<sub>13</sub>Bi<sub>12</sub>**

|    |             |             |             |
|----|-------------|-------------|-------------|
| Pd | 8.47743846  | 5.88802660  | 6.83269659  |
| Pd | 9.38757796  | 8.16258044  | 5.43174807  |
| Pd | 10.03720258 | 10.60013365 | 6.80952318  |
| Pd | 11.19252058 | 6.86011947  | 7.34806014  |
| Pd | 9.02925973  | 8.41632955  | 8.14868119  |
| Pd | 11.71568793 | 9.16417434  | 8.64599286  |
| Pd | 6.72697052  | 8.41773952  | 6.88585635  |
| Pd | 5.69934825  | 5.88396711  | 6.98760758  |
| Pd | 7.47789329  | 9.22385814  | 10.25344721 |
| Pd | 9.46029004  | 5.98520645  | 9.43518527  |
| Pd | 7.44031577  | 10.81652615 | 7.97364759  |
| Pd | 6.87490552  | 6.89213056  | 9.17142562  |
| Pd | 10.06249743 | 8.27328676  | 10.68247159 |
| Bi | 7.08038586  | 6.78351597  | 4.74236259  |
| Bi | 7.82056977  | 10.33614286 | 5.37217057  |
| Bi | 10.47703774 | 5.66845778  | 5.01951098  |
| Bi | 11.93457064 | 8.99393917  | 5.97218190  |
| Bi | 10.60536117 | 4.20930360  | 7.69104570  |
| Bi | 12.09039437 | 6.71216501  | 9.87318817  |
| Bi | 5.15719704  | 9.67903231  | 8.92653981  |
| Bi | 8.00706626  | 6.90192292  | 11.60046142 |
| Bi | 4.10029313  | 8.04112113  | 6.45722715  |
| Bi | 7.33810151  | 4.33249827  | 8.66655808  |
| Bi | 9.63857546  | 10.69354840 | 9.50195507  |
| Bi | 4.23136489  | 6.74219284  | 9.16096122  |

**Pd<sub>13</sub>Bi<sub>13</sub>**

|    |             |             |             |
|----|-------------|-------------|-------------|
| Pd | 9.62564782  | 9.34363740  | 9.91170619  |
| Pd | 7.08541128  | 5.93363706  | 7.93790896  |
| Pd | 8.27580288  | 6.76098860  | 10.15919455 |
| Pd | 9.85861432  | 6.33157177  | 7.54116151  |
| Pd | 11.19362220 | 8.64684209  | 7.94170771  |
| Pd | 8.15351596  | 8.45387897  | 7.70202261  |
| Pd | 9.39212391  | 7.74245730  | 5.33257007  |
| Pd | 5.40198651  | 8.14338146  | 7.58938977  |
| Pd | 8.16407404  | 10.03506184 | 5.33185781  |
| Pd | 6.43241652  | 10.64816943 | 8.10419911  |
| Pd | 6.96374736  | 9.11437864  | 10.20536515 |
| Pd | 9.13058171  | 10.93907506 | 7.61211894  |
| Pd | 6.76335682  | 7.73931584  | 5.36873731  |
| Bi | 10.98595249 | 6.86779812  | 10.01775454 |
| Bi | 11.41327633 | 11.11182139 | 8.94196525  |
| Bi | 8.93314220  | 4.40229525  | 9.08631763  |
| Bi | 11.86522478 | 7.08547066  | 5.91496545  |
| Bi | 10.90102874 | 10.14894809 | 5.66413736  |
| Bi | 8.21120836  | 5.30193407  | 5.52586298  |
| Bi | 5.38942829  | 10.07613723 | 5.60592157  |
| Bi | 5.47384381  | 6.75958677  | 10.00061269 |
| Bi | 4.40405050  | 9.66977463  | 9.55101517  |
| Bi | 8.59964434  | 8.42244751  | 12.18873838 |
| Bi | 7.32598485  | 12.39280938 | 6.27350385  |
| Bi | 5.09206401  | 5.86146801  | 6.20485733  |
| Bi | 8.09333158  | 11.63127642 | 10.05186412 |

**Pd<sub>13</sub>Bi<sub>4</sub>**

|    |             |             |             |
|----|-------------|-------------|-------------|
| Pd | 6.52828351  | 5.99422482  | 8.08426394  |
| Pd | 9.56394275  | 7.07675052  | 10.63182681 |
| Pd | 9.58020887  | 9.94563820  | 9.74498613  |
| Pd | 6.53203599  | 9.14090675  | 6.63165014  |
| Pd | 4.94536528  | 8.16201821  | 8.54610923  |
| Pd | 6.86892168  | 7.02191083  | 10.77937804 |
| Pd | 6.61566958  | 9.80261169  | 9.93065097  |
| Pd | 7.97756194  | 6.67781638  | 5.93918550  |
| Pd | 9.68109097  | 6.04510752  | 7.93467392  |
| Pd | 11.12048089 | 8.33629022  | 8.21159575  |
| Pd | 9.28883608  | 9.18264402  | 6.44810834  |
| Pd | 7.93303144  | 11.19736243 | 7.98780045  |
| Pd | 8.08672205  | 8.06815039  | 8.63652374  |
| Bi | 5.18858393  | 6.95636590  | 5.98326384  |
| Bi | 8.22712598  | 4.74532468  | 9.96593386  |
| Bi | 11.64481339 | 8.78155898  | 10.90416557 |
| Bi | 4.63038248  | 5.79299270  | 9.90878030  |
| Bi | 8.26650285  | 9.03927270  | 12.06723725 |
| Bi | 8.04895568  | 11.95575927 | 10.58505255 |
| Bi | 5.17528115  | 10.94780898 | 8.00788508  |
| Bi | 8.07635039  | 4.14806459  | 6.89339056  |
| Bi | 10.69258550 | 11.09352823 | 7.61377485  |
| Bi | 7.84113596  | 11.30356097 | 5.36662203  |
| Bi | 4.70720363  | 8.55734016  | 11.27027190 |
| Bi | 10.70152381 | 7.08453316  | 5.69616490  |
| Bi | 11.77719700 | 6.01515913  | 9.54457797  |
| Bi | 7.71851201  | 8.58477643  | 4.15465305  |

**Pd<sub>13</sub>Bi<sub>5</sub>**

|    |             |             |             |
|----|-------------|-------------|-------------|
| Pd | 9.40670205  | 5.81155514  | 7.78222067  |
| Pd | 6.66783452  | 8.68271483  | 6.89396418  |
| Pd | 7.53020866  | 10.79714481 | 8.63276523  |
| Pd | 11.25650482 | 8.26550832  | 9.91091814  |
| Pd | 11.41963793 | 7.51398366  | 7.16215089  |
| Pd | 9.13760716  | 7.97093632  | 5.71308862  |
| Pd | 8.89890399  | 10.67024385 | 6.29100879  |
| Pd | 11.04011501 | 10.20788135 | 7.88959583  |
| Pd | 9.33995769  | 6.46199933  | 10.46675038 |
| Pd | 6.93819277  | 6.71953864  | 8.79401218  |
| Pd | 7.46487001  | 8.76811187  | 10.53631313 |
| Pd | 9.71077946  | 10.55976016 | 10.31221856 |
| Pd | 8.97468757  | 8.46702075  | 8.35195206  |
| Bi | 11.65743362 | 5.71591865  | 9.26921257  |
| Bi | 7.22522377  | 6.02402379  | 6.09055953  |
| Bi | 6.15813252  | 11.31681411 | 6.38734835  |
| Bi | 10.47804601 | 5.71393902  | 5.37053305  |
| Bi | 7.40196910  | 9.47649429  | 4.35031832  |
| Bi | 9.64106355  | 12.41919362 | 8.28019558  |
| Bi | 13.45693345 | 8.92566292  | 8.24007224  |
| Bi | 7.95448286  | 4.31111690  | 9.49245309  |
| Bi | 7.38341021  | 11.32577363 | 11.31530217 |
| Bi | 9.71702507  | 8.51919076  | 12.13434756 |
| Bi | 11.24566843 | 9.60122789  | 5.31642683  |
| Bi | 6.85135927  | 6.33897230  | 11.51863173 |
| Bi | 12.40612348 | 10.74359247 | 10.30672589 |
| Bi | 5.12796331  | 10.04048336 | 9.58700084  |
| Bi | 4.62167771  | 7.55175018  | 8.04749358  |

**Pd<sub>14</sub>**

|    |             |            |            |
|----|-------------|------------|------------|
| Pd | 6.01800980  | 7.55640983 | 8.27819073 |
| Pd | 7.06352360  | 9.68638014 | 7.25480746 |
| Pd | 3.92427670  | 6.56590907 | 7.14309812 |
| Pd | 5.38411957  | 8.23477659 | 5.82839917 |
| Pd | 5.49498679  | 5.00056041 | 8.45661141 |
| Pd | 6.08008894  | 5.71905678 | 6.00673413 |
| Pd | 7.84028899  | 7.57739699 | 6.07648819 |
| Pd | 7.90057923  | 5.82236177 | 8.20767957 |
| Pd | 9.60783681  | 9.28682189 | 6.78275692 |
| Pd | 8.50354077  | 8.23446914 | 8.85486521 |
| Pd | 10.01705054 | 6.77308049 | 7.14249814 |
| Pd | 9.77995525  | 4.23813803 | 7.50228222 |
| Pd | 7.26898056  | 3.66597703 | 7.03054596 |
| Pd | 8.60663147  | 5.21198274 | 5.43064534 |

**Pd<sub>14</sub>Bi**

|    |             |            |            |
|----|-------------|------------|------------|
| Pd | 5.74192130  | 6.64404494 | 5.24814172 |
| Pd | 9.23493805  | 4.51928104 | 6.82649208 |
| Pd | 4.26509403  | 5.44521945 | 6.87207905 |
| Pd | 5.82105989  | 6.81585526 | 8.35196047 |
| Pd | 7.97175523  | 8.19248976 | 8.95115381 |
| Pd | 6.63586011  | 4.47788193 | 6.92493389 |
| Pd | 4.27874990  | 8.02830560 | 6.71823321 |
| Pd | 7.94258403  | 5.45592566 | 9.05984658 |
| Pd | 10.03343453 | 6.65210149 | 5.32248834 |
| Pd | 9.25748957  | 8.91747171 | 6.63476106 |
| Pd | 7.84557975  | 5.28766614 | 4.64002625 |
| Pd | 7.85867035  | 6.72630515 | 6.80396979 |
| Pd | 6.65539187  | 8.98176272 | 6.73556222 |
| Pd | 7.84206909  | 7.95508379 | 4.53470979 |
| Bi | 10.18296481 | 6.77562630 | 8.07176742 |

**Pd<sub>14</sub>Bi<sub>2</sub>**

|    |             |            |            |
|----|-------------|------------|------------|
| Pd | 8.41079848  | 6.90952846 | 7.16727764 |
| Pd | 10.55834107 | 6.22920484 | 5.81865386 |
| Pd | 9.53135782  | 8.80177730 | 8.54250721 |
| Pd | 6.39988515  | 7.58025938 | 5.62478713 |
| Pd | 7.18533585  | 5.02097346 | 8.51191629 |
| Pd | 6.39898617  | 7.57716949 | 8.71124466 |
| Pd | 7.18621849  | 5.02352964 | 5.81925593 |
| Pd | 10.55888046 | 6.22645203 | 8.51502699 |
| Pd | 9.53042614  | 8.80541494 | 5.79634858 |
| Pd | 8.47671854  | 6.82950030 | 9.89244981 |
| Pd | 8.47706179  | 6.83517447 | 4.44143172 |
| Pd | 7.37279858  | 9.41236771 | 7.17068937 |
| Pd | 9.29915836  | 4.39675943 | 7.16568645 |
| Pd | 4.67179226  | 8.62527433 | 7.16851045 |
| Bi | 5.01392932  | 5.90558096 | 7.16624552 |
| Bi | 11.68967187 | 8.18070934 | 7.16806607 |

**Pd<sub>14</sub>Bi<sub>3</sub>**

|    |             |            |            |
|----|-------------|------------|------------|
| Pd | 4.33780820  | 8.44639466 | 7.59960140 |
| Pd | 6.60494941  | 9.28778303 | 6.63407897 |
| Pd | 8.60097857  | 9.35751119 | 8.31657337 |
| Pd | 5.45259288  | 6.92768090 | 5.77423098 |
| Pd | 6.55496092  | 7.81569902 | 8.97391858 |
| Pd | 9.01314983  | 7.05081192 | 9.49531816 |
| Pd | 7.30507951  | 5.14924264 | 8.78076902 |
| Pd | 7.96210392  | 6.97256500 | 7.00439029 |
| Pd | 7.51257542  | 5.65700277 | 4.62901127 |
| Pd | 8.60712558  | 4.32032518 | 6.60331477 |
| Pd | 9.92347378  | 6.44726460 | 5.44765721 |
| Pd | 6.02431035  | 4.51082426 | 6.51272661 |
| Pd | 9.20137696  | 9.04427211 | 5.75184805 |
| Pd | 10.71001452 | 8.02276080 | 7.59788289 |
| Bi | 4.80727997  | 5.97755960 | 8.32750424 |
| Bi | 7.25581149  | 8.21813372 | 4.32538388 |
| Bi | 10.42452368 | 5.49824656 | 7.95827755 |

**Pd<sub>14</sub>Bi<sub>4</sub>**

|    |             |            |            |
|----|-------------|------------|------------|
| Pd | 5.72103975  | 6.76441204 | 4.43066207 |
| Pd | 8.02637363  | 8.28009283 | 4.61822636 |
| Pd | 8.46972295  | 9.13091366 | 7.25969580 |
| Pd | 4.60050903  | 6.77884593 | 7.02668882 |
| Pd | 7.17419809  | 6.82461923 | 6.63497871 |
| Pd | 6.32329445  | 8.18696218 | 8.67702287 |
| Pd | 8.69293380  | 6.88758483 | 8.78891151 |
| Pd | 6.36814145  | 5.50101699 | 8.71197059 |
| Pd | 10.90781384 | 8.19344856 | 8.00999294 |
| Pd | 12.15849170 | 6.79262435 | 6.00940924 |
| Pd | 8.09538679  | 5.34791130 | 4.63743163 |
| Pd | 9.62571831  | 6.83756466 | 6.12236335 |
| Pd | 8.51017609  | 4.56311491 | 7.31326277 |
| Pd | 10.90371732 | 5.55715483 | 8.08544218 |
| Bi | 5.90278985  | 9.07047433 | 6.15599254 |
| Bi | 10.57850639 | 9.17011866 | 5.55337082 |
| Bi | 10.62645881 | 4.47473638 | 5.65533718 |
| Bi | 5.97883978  | 4.53808434 | 6.17563731 |

**Pd<sub>14</sub>Bi<sub>5</sub>**

|    |             |             |            |
|----|-------------|-------------|------------|
| Pd | 6.47827737  | 9.77792132  | 6.05383537 |
| Pd | 10.79139497 | 9.21366521  | 6.52147982 |
| Pd | 8.46731038  | 9.73957618  | 8.01771046 |
| Pd | 8.00137952  | 7.46485048  | 9.52529637 |
| Pd | 8.68807673  | 8.36251824  | 5.13969463 |
| Pd | 6.24929615  | 7.45297380  | 4.53607994 |
| Pd | 7.10929420  | 7.46004216  | 7.03222963 |
| Pd | 10.83956696 | 6.81756378  | 5.19464351 |
| Pd | 4.57873713  | 7.89752267  | 6.66356014 |
| Pd | 5.57546343  | 6.29764424  | 8.80186550 |
| Pd | 9.51726902  | 7.07551376  | 7.46261373 |
| Pd | 8.32930060  | 5.69859234  | 5.30737312 |
| Pd | 7.89064311  | 5.08689018  | 8.01973320 |
| Pd | 12.04800682 | 6.97777004  | 7.58139762 |
| Bi | 5.92185153  | 9.10956603  | 8.75602594 |
| Bi | 8.85633364  | 10.92110117 | 5.68781638 |
| Bi | 10.58626973 | 8.67047770  | 9.22440973 |
| Bi | 5.77518329  | 5.36131280  | 6.20303017 |
| Bi | 10.37881147 | 4.71214525  | 6.79581969 |

**Pd<sub>14</sub>Bi<sub>6</sub>**

|    |             |            |            |
|----|-------------|------------|------------|
| Pd | 8.62983901  | 5.49567603 | 9.36578126 |
| Pd | 4.41428207  | 6.94680605 | 8.17758597 |
| Pd | 6.94786869  | 6.94810032 | 7.91562995 |
| Pd | 7.99547292  | 4.51631531 | 6.88673281 |
| Pd | 5.54595793  | 5.54637533 | 6.11734678 |
| Pd | 7.58689456  | 6.98278126 | 5.23489096 |
| Pd | 8.00415706  | 9.40113645 | 6.96706336 |
| Pd | 8.63624214  | 8.31567322 | 9.42521772 |
| Pd | 9.80306189  | 8.48562651 | 5.09124582 |
| Pd | 5.55102504  | 8.39803348 | 6.14418452 |
| Pd | 10.98184068 | 6.87413195 | 9.16323360 |
| Pd | 9.31681504  | 6.95603296 | 7.18640217 |
| Pd | 9.81529790  | 5.51163872 | 5.04206671 |
| Pd | 11.74624081 | 7.02582626 | 6.37483452 |
| Bi | 5.99489393  | 4.64656366 | 8.67898803 |
| Bi | 7.35558352  | 4.52369127 | 4.33769546 |
| Bi | 10.62981516 | 4.66949873 | 7.56180736 |
| Bi | 5.98717107  | 9.23637417 | 8.71951161 |
| Bi | 7.36496826  | 9.47081841 | 4.40927214 |
| Bi | 10.62209230 | 9.21803168 | 7.71223922 |

**Pd<sub>14</sub>Bi<sub>7</sub>**

|    |             |             |            |
|----|-------------|-------------|------------|
| Pd | 5.97902553  | 7.78576743  | 8.89126013 |
| Pd | 8.36947327  | 9.40288508  | 7.09962921 |
| Pd | 8.68568583  | 7.53007636  | 9.41284918 |
| Pd | 9.63825773  | 5.31307395  | 8.15001111 |
| Pd | 10.39086336 | 9.51776827  | 8.68178920 |
| Pd | 10.41680021 | 7.53337393  | 6.97050733 |
| Pd | 10.45599690 | 9.78300255  | 5.65257558 |
| Pd | 7.61725621  | 4.12752807  | 6.72407836 |
| Pd | 7.78678474  | 6.84606550  | 6.96163571 |
| Pd | 8.59822588  | 8.02404368  | 4.66571048 |
| Pd | 5.89841407  | 8.11014528  | 5.24183261 |
| Pd | 9.56812139  | 5.56941846  | 5.43525615 |
| Pd | 5.85499171  | 10.07758068 | 7.27029209 |
| Pd | 5.36675733  | 5.84203810  | 6.88951358 |
| Bi | 7.49709188  | 9.91112162  | 9.51907025 |
| Bi | 11.30083861 | 7.09298837  | 9.38195971 |
| Bi | 7.03898762  | 5.32398482  | 9.11058372 |
| Bi | 4.07155032  | 8.14767987  | 7.12238986 |
| Bi | 6.97004937  | 5.74481288  | 4.58344136 |
| Bi | 11.19775503 | 7.52022923  | 4.47106762 |
| Bi | 7.29510182  | 10.35640035 | 4.92398227 |

**Pd<sub>14</sub>Bi<sub>8</sub>**

|    |             |             |             |
|----|-------------|-------------|-------------|
| Pd | 7.10168046  | 7.69476023  | 9.29154523  |
| Pd | 6.46169075  | 7.08256928  | 6.59537730  |
| Pd | 5.61504598  | 9.86172183  | 8.64556167  |
| Pd | 7.72010404  | 9.57023178  | 6.94909256  |
| Pd | 7.21371395  | 8.83521984  | 4.43137829  |
| Pd | 7.98004966  | 5.08019841  | 7.79289288  |
| Pd | 5.84276412  | 5.30849645  | 9.44869346  |
| Pd | 9.11571942  | 7.44923603  | 7.68877484  |
| Pd | 11.25701311 | 7.23823775  | 6.16916336  |
| Pd | 10.55120534 | 5.45025149  | 8.72305922  |
| Pd | 10.31943038 | 9.81518178  | 7.84030686  |
| Pd | 9.64937142  | 8.00048762  | 10.28994917 |
| Pd | 7.48581384  | 4.61775720  | 5.21692369  |
| Pd | 8.74654764  | 6.85846735  | 5.09651415  |
| Bi | 9.79674804  | 9.33564692  | 5.21222596  |
| Bi | 8.20500915  | 10.16323839 | 9.50258189  |
| Bi | 4.49519787  | 7.43034615  | 8.57045816  |
| Bi | 5.20163850  | 9.39349441  | 6.05098223  |
| Bi | 8.41114493  | 5.57983044  | 10.38202174 |
| Bi | 11.76225106 | 7.78466013  | 8.69232821  |
| Bi | 10.09430861 | 4.77504522  | 6.12786245  |
| Bi | 5.47419275  | 4.63018358  | 6.90753569  |

**Pd<sub>14</sub>Bi<sub>9</sub>**

|    |             |             |             |
|----|-------------|-------------|-------------|
| Pd | 8.73225351  | 9.21900453  | 9.49745788  |
| Pd | 7.21474110  | 7.74082186  | 7.78579842  |
| Pd | 4.60058570  | 7.73628604  | 7.99889260  |
| Pd | 7.18987830  | 10.91325025 | 8.06987815  |
| Pd | 8.39785061  | 9.55039821  | 6.06446745  |
| Pd | 6.78463892  | 7.74315943  | 4.86235778  |
| Pd | 11.24068151 | 9.32131596  | 5.96808844  |
| Pd | 11.24239320 | 6.16449204  | 5.96590356  |
| Pd | 8.39982166  | 5.93539432  | 6.06326042  |
| Pd | 9.77984522  | 7.74254021  | 7.50951090  |
| Pd | 11.52580834 | 9.19104653  | 8.97052076  |
| Pd | 11.52760649 | 6.29003989  | 8.96792336  |
| Pd | 7.19509984  | 4.56424467  | 8.06265126  |
| Pd | 8.73616101  | 6.25912509  | 9.49041433  |
| Bi | 9.60475096  | 7.74350001  | 4.48729247  |
| Bi | 9.94783335  | 10.93418005 | 7.73308638  |
| Bi | 6.05535325  | 9.29481314  | 9.83385241  |
| Bi | 5.64791806  | 5.83913581  | 6.33057925  |
| Bi | 5.64497878  | 9.64260079  | 6.33340584  |
| Bi | 9.95398853  | 4.54597753  | 7.72538583  |
| Bi | 12.93655596 | 7.74274146  | 7.24854808  |
| Bi | 10.41339701 | 7.73834496  | 10.90517509 |
| Bi | 6.06109348  | 6.17474022  | 9.83238564  |



**Pd<sub>14</sub>Bi<sub>10</sub>**

|    |             |             |             |
|----|-------------|-------------|-------------|
| Pd | 6.13246706  | 8.66206659  | 5.77069453  |
| Pd | 6.37030106  | 5.93620192  | 6.46654512  |
| Pd | 7.95811927  | 7.79446083  | 7.63453059  |
| Pd | 9.31171292  | 9.78852763  | 8.90434050  |
| Pd | 5.90884868  | 9.33756647  | 8.65875149  |
| Pd | 9.23734005  | 6.25621633  | 9.42395531  |
| Pd | 6.19242070  | 6.42530777  | 9.20963321  |
| Pd | 9.25081528  | 5.76613825  | 6.45526977  |
| Pd | 10.56555660 | 7.73608167  | 7.62774129  |
| Pd | 12.50584077 | 9.38953501  | 8.61054896  |
| Pd | 12.28309235 | 8.63261116  | 5.72118231  |
| Pd | 12.41145867 | 6.46881490  | 9.22590646  |
| Pd | 12.22076944 | 5.89114530  | 6.47346991  |
| Pd | 9.26419795  | 8.79754026  | 5.51988182  |
| Bi | 7.62199758  | 4.40441360  | 8.23441269  |
| Bi | 7.63593556  | 6.95884741  | 4.39246656  |
| Bi | 7.59893422  | 8.30446955  | 10.43545569 |
| Bi | 4.46940601  | 7.46931186  | 7.47083469  |
| Bi | 7.57579682  | 10.53916239 | 6.94832953  |
| Bi | 10.91713408 | 4.48158408  | 8.28737224  |
| Bi | 10.92942466 | 8.26377276  | 10.45356551 |
| Bi | 14.02639392 | 7.57780625  | 7.42537196  |
| Bi | 10.91117388 | 10.59169300 | 6.86012884  |
| Bi | 10.81993847 | 6.81919619  | 4.43619808  |

**Pd<sub>14</sub>Bi<sub>11</sub>**

|    |             |             |             |
|----|-------------|-------------|-------------|
| Pd | 9.24344082  | 5.86929903  | 7.88622454  |
| Pd | 8.41189556  | 9.76919867  | 5.21916670  |
| Pd | 11.43489084 | 7.68275644  | 7.28876616  |
| Pd | 8.69251350  | 8.56491024  | 7.68233649  |
| Pd | 10.78701605 | 10.31837064 | 7.00775886  |
| Pd | 6.68528890  | 6.81002133  | 7.09785951  |
| Pd | 6.95009927  | 4.66433560  | 8.77605482  |
| Pd | 7.03313944  | 9.87832980  | 9.50805200  |
| Pd | 10.12138297 | 7.64468927  | 9.85030891  |
| Pd | 6.25740834  | 9.68658112  | 6.95727738  |
| Pd | 7.32342690  | 7.21158686  | 9.73710230  |
| Pd | 9.70722473  | 10.32436720 | 9.67349815  |
| Pd | 4.26121540  | 7.88626277  | 6.81536100  |
| Pd | 8.69932420  | 6.99345017  | 5.30964408  |
| Bi | 7.72362739  | 4.54578578  | 6.14812956  |
| Bi | 6.24775564  | 8.14166604  | 4.81529915  |
| Bi | 10.93629665 | 5.42505118  | 5.80116355  |
| Bi | 10.78962261 | 8.65545517  | 4.90502308  |
| Bi | 11.72933198 | 5.57171576  | 8.93291473  |
| Bi | 12.11525522 | 9.38545015  | 9.18040898  |
| Bi | 4.51908054  | 9.40579450  | 8.99367773  |
| Bi | 8.41162650  | 8.88957222  | 11.56022781 |
| Bi | 4.82685722  | 6.37429739  | 9.02835235  |
| Bi | 8.94013734  | 5.23912639  | 10.52987818 |
| Bi | 8.35912520  | 11.28450769 | 7.50770761  |

**Pd<sub>14</sub>Bi<sub>12</sub>**

|    |             |             |             |
|----|-------------|-------------|-------------|
| Pd | 8.49125657  | 9.51397090  | 6.56704711  |
| Pd | 7.83362540  | 6.80225078  | 5.51787902  |
| Pd | 7.27454146  | 4.69415306  | 7.25738623  |
| Pd | 5.74466207  | 8.49572353  | 6.94047234  |
| Pd | 7.92320438  | 7.25291173  | 8.26418261  |
| Pd | 5.28127967  | 6.36989704  | 8.64074124  |
| Pd | 10.27560995 | 7.30417508  | 6.79411598  |
| Pd | 11.12650683 | 9.87023475  | 6.71390733  |
| Pd | 9.20937167  | 6.89710126  | 10.78669242 |
| Pd | 7.24837832  | 9.78548373  | 8.95612779  |
| Pd | 9.68734471  | 5.24415141  | 8.66747745  |
| Pd | 9.99564544  | 8.76937819  | 9.02199209  |
| Pd | 6.66740841  | 7.75089631  | 10.68647099 |
| Pd | 12.11784301 | 5.50317281  | 7.48001481  |
| Bi | 9.86270843  | 8.52924247  | 4.47878820  |
| Bi | 9.66337190  | 4.82380446  | 6.04128214  |
| Bi | 6.75093383  | 9.14036912  | 4.48207905  |
| Bi | 5.34262593  | 6.01608770  | 6.02200939  |
| Bi | 6.40334529  | 11.17981866 | 6.80335871  |
| Bi | 4.70012005  | 8.91863442  | 9.36269774  |
| Bi | 11.73426076 | 6.69605013  | 9.80573475  |
| Bi | 8.65277124  | 9.53854729  | 11.26377166 |
| Bi | 12.98667639 | 7.90195043  | 6.71204934  |
| Bi | 9.45015184  | 11.36836272 | 8.46967985  |
| Bi | 7.27398957  | 5.15289671  | 9.90723159  |
| Bi | 12.50853088 | 9.72057204  | 9.05107441  |

**Pd<sub>14</sub>Bi<sub>13</sub>**

|    |             |             |             |
|----|-------------|-------------|-------------|
| Pd | 8.50899139  | 9.98751048  | 10.16997666 |
| Pd | 11.26543028 | 9.50835907  | 7.32621572  |
| Pd | 10.27438322 | 7.04577466  | 6.17161830  |
| Pd | 6.68267506  | 6.94159630  | 9.01579189  |
| Pd | 6.38694332  | 9.68909710  | 8.56562761  |
| Pd | 8.71055237  | 10.82455409 | 7.58605529  |
| Pd | 8.90956285  | 9.25632208  | 5.32475905  |
| Pd | 6.78875411  | 7.94505896  | 6.37376689  |
| Pd | 8.75588653  | 7.18242142  | 10.72050897 |
| Pd | 10.77381332 | 8.63490153  | 9.93388007  |
| Pd | 12.38924679 | 7.01307610  | 7.84954518  |
| Pd | 10.14039241 | 5.95361983  | 8.75447632  |
| Pd | 8.22364125  | 5.52281757  | 6.98211715  |
| Pd | 8.90525216  | 8.26102994  | 8.11114643  |
| Bi | 6.48727478  | 8.57129634  | 11.12590123 |
| Bi | 10.82336837 | 11.32343314 | 9.36328684  |
| Bi | 11.58884028 | 8.83854006  | 4.73607292  |
| Bi | 7.23370778  | 12.12301068 | 9.33803613  |
| Bi | 10.36057919 | 11.50974422 | 5.62078444  |
| Bi | 8.21977959  | 6.71439969  | 4.50132536  |
| Bi | 4.42142741  | 8.02640259  | 7.82088220  |
| Bi | 11.19160961 | 4.69797221  | 6.71454842  |
| Bi | 7.98858257  | 4.74114286  | 9.64586952  |
| Bi | 6.55913768  | 10.56674676 | 5.93506145  |
| Bi | 12.06278339 | 6.40549778  | 10.48301573 |
| Bi | 5.56616877  | 5.45890003  | 6.92544191  |
| Bi | 13.25787008 | 9.19268401  | 9.16243968  |

**Pd<sub>14</sub>Bi<sub>14</sub>**

|    |             |             |             |
|----|-------------|-------------|-------------|
| Pd | 7.86371237  | 10.48353917 | 5.83248979  |
| Pd | 10.82389456 | 10.14073749 | 8.31711268  |
| Pd | 10.42184390 | 7.02838676  | 8.98210742  |
| Pd | 6.51183887  | 7.18494730  | 6.61588404  |
| Pd | 6.00571909  | 9.78955917  | 7.62639763  |
| Pd | 8.21295975  | 11.00221654 | 8.59439740  |
| Pd | 8.94900706  | 8.92133836  | 10.30438386 |
| Pd | 6.76627716  | 7.62270668  | 9.33420231  |
| Pd | 8.44831252  | 7.92460273  | 4.84508454  |
| Pd | 10.33002133 | 9.79363793  | 5.57935821  |
| Pd | 11.96713503 | 8.11016970  | 6.91936538  |
| Pd | 10.03147428 | 6.35429495  | 6.38198892  |
| Pd | 8.18631071  | 5.54348024  | 8.13396679  |
| Pd | 8.75802814  | 8.52881619  | 7.50033118  |
| Bi | 5.89682558  | 9.04130799  | 4.88295825  |
| Bi | 9.80099892  | 12.29978638 | 6.67929370  |
| Bi | 11.79965957 | 8.81598149  | 10.42983572 |
| Bi | 6.53306268  | 12.38505280 | 7.08585606  |
| Bi | 9.95741185  | 11.36173779 | 10.59322275 |
| Bi | 8.52571492  | 6.24158957  | 10.74322722 |
| Bi | 4.26898957  | 7.83293164  | 8.22580094  |
| Bi | 10.66394728 | 4.43092116  | 8.09616991  |
| Bi | 7.84156963  | 5.28104034  | 5.35319147  |
| Bi | 6.41600481  | 10.03777395 | 10.36283075 |
| Bi | 11.19662775 | 7.62156058  | 4.36166851  |
| Bi | 5.57587071  | 5.18738043  | 8.32075409  |
| Bi | 13.00547580 | 6.34814310  | 8.52542577  |
| Bi | 12.64619084 | 10.64800443 | 6.47692671  |

**Pd<sub>14</sub>Bi<sub>15</sub>**

|    |             |             |             |
|----|-------------|-------------|-------------|
| Pd | 7.18272948  | 6.53087615  | 6.58007907  |
| Pd | 6.22759358  | 9.38446564  | 9.07824595  |
| Pd | 9.60456062  | 9.90525617  | 10.22531790 |
| Pd | 10.65593326 | 6.49092783  | 7.94956647  |
| Pd | 9.42182928  | 7.69680159  | 5.75780564  |
| Pd | 7.15378597  | 9.38526911  | 6.50230375  |
| Pd | 8.80155054  | 10.93333900 | 7.96584778  |
| Pd | 10.91287102 | 9.33338128  | 7.35994342  |
| Pd | 8.36785756  | 5.09659310  | 8.78045346  |
| Pd | 6.27941608  | 6.70093774  | 9.21675526  |
| Pd | 7.64881373  | 8.51307474  | 11.25490773 |
| Pd | 9.60443685  | 6.76608276  | 10.51311191 |
| Pd | 11.71008178 | 8.31460259  | 9.79975770  |
| Pd | 8.52404998  | 8.08503631  | 8.44981124  |
| Bi | 9.27265615  | 4.88476735  | 6.26554927  |
| Bi | 4.88369167  | 7.95362143  | 7.10805610  |
| Bi | 7.41542683  | 11.39187699 | 10.42724661 |
| Bi | 7.04536714  | 7.85265790  | 4.32751668  |
| Bi | 6.20810931  | 11.63453976 | 7.57063769  |
| Bi | 11.47543954 | 11.30871827 | 9.10428928  |
| Bi | 12.22790013 | 7.41740436  | 5.96199752  |
| Bi | 5.94208360  | 4.52034736  | 7.75126897  |
| Bi | 10.42334199 | 8.53343456  | 12.25465414 |
| Bi | 10.77308641 | 4.52936225  | 9.82318319  |
| Bi | 9.41749748  | 10.35575950 | 5.36921616  |
| Bi | 7.33110697  | 5.80420552  | 11.51814467 |
| Bi | 13.24053408 | 6.28392287  | 8.78940480  |
| Bi | 13.60604980 | 9.26474922  | 8.10594469  |
| Bi | 5.01417617  | 8.13309964  | 11.08415671 |

**Pd<sub>15</sub>**

|    |             |            |            |
|----|-------------|------------|------------|
| Pd | 4.65834739  | 7.41107742 | 8.83292033 |
| Pd | 4.50329697  | 5.30091723 | 7.15505714 |
| Pd | 5.47464822  | 7.41135905 | 6.09102872 |
| Pd | 10.50090775 | 7.41135905 | 6.91387776 |
| Pd | 9.00382493  | 5.29961286 | 7.15498343 |
| Pd | 8.84920674  | 7.41101813 | 8.83216853 |
| Pd | 6.75331782  | 5.16677458 | 5.79039842 |
| Pd | 6.75349341  | 9.65557295 | 5.79051635 |
| Pd | 8.03293292  | 7.41131458 | 6.09328411 |
| Pd | 6.75369602  | 6.01348890 | 8.18553478 |
| Pd | 9.00385195  | 9.52280879 | 7.15541093 |
| Pd | 6.75384460  | 7.41095884 | 10.3079837 |
| Pd | 6.75375005  | 8.80845843 | 8.18528418 |
| Pd | 4.50360763  | 9.52172675 | 7.15564678 |
| Pd | 3.00610609  | 7.41150727 | 6.91446740 |

**Pd<sub>15</sub>Bi**

|    |             |             |            |
|----|-------------|-------------|------------|
| Pd | 6.52895019  | 6.09392491  | 8.75922270 |
| Pd | 8.88393247  | 5.21722539  | 8.11524300 |
| Pd | 6.66203357  | 8.94061145  | 8.64965957 |
| Pd | 7.39127847  | 10.25675461 | 6.42630036 |
| Pd | 8.67787078  | 7.40529342  | 9.43546623 |
| Pd | 10.40041918 | 7.17698318  | 7.36981491 |
| Pd | 7.61721073  | 7.37465004  | 6.87594423 |
| Pd | 4.42032393  | 7.55150363  | 8.55024685 |
| Pd | 9.26446333  | 8.57871496  | 5.41428444 |
| Pd | 6.87228169  | 8.68397862  | 4.44639774 |
| Pd | 6.77805728  | 6.20029723  | 4.59732939 |
| Pd | 9.15910004  | 5.88528970  | 5.47018144 |
| Pd | 5.28890194  | 8.72251567  | 6.43861192 |
| Pd | 7.13351446  | 4.44224182  | 6.44081489 |
| Pd | 5.20139076  | 6.19391134  | 6.54452202 |
| Bi | 9.33234318  | 9.53324247  | 8.00897038 |

**Pd<sub>15</sub>Bi<sub>2</sub>**

|    |             |            |            |
|----|-------------|------------|------------|
| Pd | 8.20508953  | 5.70727910 | 9.52580496 |
| Pd | 5.21330551  | 8.07565927 | 7.24608687 |
| Pd | 6.21811218  | 7.44701166 | 9.55965167 |
| Pd | 9.70860294  | 5.63743741 | 5.37000231 |
| Pd | 8.79391428  | 8.27628409 | 9.46308117 |
| Pd | 9.98133009  | 6.67247220 | 7.74857918 |
| Pd | 6.04720134  | 5.35209372 | 7.97805170 |
| Pd | 7.59478494  | 7.29388382 | 7.28717741 |
| Pd | 7.00775526  | 5.59610548 | 5.36970751 |
| Pd | 8.30222044  | 7.86075061 | 4.83996656 |
| Pd | 9.14341820  | 9.34331639 | 7.08642756 |
| Pd | 6.87603145  | 9.77251140 | 8.44513904 |
| Pd | 5.64501702  | 7.83344202 | 4.71100935 |
| Pd | 10.75569996 | 7.98426882 | 5.60020483 |
| Pd | 4.51236569  | 5.89234657 | 5.98860666 |
| Bi | 8.44698124  | 4.37789906 | 7.28185684 |
| Bi | 6.85322813  | 9.88890940 | 5.82549390 |

**Pd<sub>15</sub>Bi<sub>3</sub>**

|    |             |            |            |
|----|-------------|------------|------------|
| Pd | 4.81042647  | 7.26596691 | 5.42284322 |
| Pd | 6.55777587  | 9.01584870 | 6.33719013 |
| Pd | 8.77415560  | 9.34984530 | 5.07781967 |
| Pd | 5.83852356  | 6.46117510 | 7.75090379 |
| Pd | 4.38511944  | 8.56141344 | 7.67684996 |
| Pd | 7.40309837  | 7.12006663 | 4.60041522 |
| Pd | 10.03874219 | 7.08175898 | 4.73952828 |
| Pd | 8.77848796  | 4.94167204 | 5.68774295 |
| Pd | 8.47389561  | 7.22721283 | 6.93193845 |
| Pd | 7.83539153  | 6.40840848 | 9.46462654 |
| Pd | 9.72012961  | 5.10796467 | 8.18301786 |
| Pd | 10.06412889 | 7.73684854 | 8.86440144 |
| Pd | 7.27974590  | 4.34476402 | 7.83124834 |
| Pd | 8.73756231  | 9.78666768 | 7.72338192 |
| Pd | 10.89164233 | 8.97355188 | 6.51905520 |
| Bi | 6.14156521  | 5.00087608 | 5.50612619 |
| Bi | 6.72951972  | 8.74035047 | 8.97909660 |
| Bi | 11.41935940 | 6.48793285 | 6.86261644 |

**Pd<sub>15</sub>Bi<sub>4</sub>**

|    |             |            |            |
|----|-------------|------------|------------|
| Pd | 5.94655993  | 6.50381245 | 4.45813191 |
| Pd | 7.04774898  | 6.79564722 | 6.82214428 |
| Pd | 4.46917945  | 6.83563129 | 6.82410430 |
| Pd | 5.96422625  | 8.31463412 | 8.63008777 |
| Pd | 8.26985375  | 6.98680152 | 9.17926234 |
| Pd | 5.93627804  | 5.63136605 | 8.84466155 |
| Pd | 10.58250142 | 8.29450618 | 8.63430934 |
| Pd | 8.29541775  | 9.15207068 | 7.42184067 |
| Pd | 8.24771705  | 8.02277216 | 4.80513699 |
| Pd | 10.61450609 | 6.63891837 | 4.43733929 |
| Pd | 8.31483910  | 5.22550464 | 5.05212643 |
| Pd | 9.51450914  | 6.78890620 | 6.82448808 |
| Pd | 8.26930737  | 4.56950497 | 7.82324647 |
| Pd | 10.58543201 | 5.59896563 | 8.86498815 |
| Pd | 12.08953548 | 6.80645189 | 6.88234282 |
| Bi | 5.95314962  | 9.02915568 | 5.99695011 |
| Bi | 10.62194018 | 8.99449920 | 5.95650251 |
| Bi | 10.62381112 | 4.46270864 | 6.37731658 |
| Bi | 5.94493735  | 4.46053411 | 6.37591853 |

**Pd<sub>15</sub>Bi<sub>5</sub>**

|    |             |             |            |
|----|-------------|-------------|------------|
| Pd | 6.02449768  | 9.91151975  | 6.74022958 |
| Pd | 8.28026979  | 9.29649318  | 5.20041853 |
| Pd | 7.04850766  | 7.48172963  | 6.77620856 |
| Pd | 4.46343458  | 7.46413952  | 6.74775849 |
| Pd | 5.96504769  | 5.53582037  | 5.45189225 |
| Pd | 8.28063400  | 6.62163465  | 4.50105592 |
| Pd | 10.50918924 | 9.93275024  | 6.74890949 |
| Pd | 9.51181670  | 7.48601244  | 6.77191600 |
| Pd | 12.09544947 | 7.47054844  | 6.74031082 |
| Pd | 10.61222927 | 5.59565732  | 8.15589485 |
| Pd | 8.28171010  | 5.10683594  | 6.82341320 |
| Pd | 10.59368736 | 5.52344612  | 5.46758651 |
| Pd | 5.94968440  | 5.57643057  | 8.13960478 |
| Pd | 8.28295174  | 6.69381526  | 9.07708949 |
| Pd | 8.26800233  | 9.33226992  | 8.31760392 |
| Bi | 5.90309785  | 8.09280990  | 4.46954553 |
| Bi | 8.26113189  | 11.42443708 | 6.74360134 |
| Bi | 10.65921314 | 8.08002266  | 4.46712166 |
| Bi | 10.68846631 | 8.18518090  | 9.02639122 |
| Bi | 5.87374535  | 8.14590142  | 9.04547078 |

**Pd<sub>15</sub>Bi<sub>6</sub>**

|    |             |             |            |
|----|-------------|-------------|------------|
| Pd | 12.13391072 | 8.03658227  | 6.89133354 |
| Pd | 10.62093070 | 10.57999800 | 6.25681380 |
| Pd | 10.61714280 | 6.89743993  | 8.90348768 |
| Pd | 8.39370063  | 10.54307051 | 7.95437947 |
| Pd | 9.54711344  | 8.25137575  | 6.99040261 |
| Pd | 8.34405932  | 9.66074430  | 5.02522896 |
| Pd | 10.40644967 | 5.89717812  | 6.36228868 |
| Pd | 8.33329374  | 8.30828557  | 9.46554176 |
| Pd | 4.47680536  | 8.57912584  | 6.90810736 |
| Pd | 5.99285889  | 6.00669922  | 6.25489482 |
| Pd | 6.02879402  | 9.66218820  | 8.92650164 |
| Pd | 8.22369410  | 6.06116934  | 7.97720014 |
| Pd | 7.06433364  | 8.33686495  | 6.99468235 |
| Pd | 8.25319978  | 6.94525479  | 4.97106955 |
| Pd | 6.20542936  | 10.71434765 | 6.39895638 |
| Bi | 8.44362437  | 12.15347394 | 5.86546612 |
| Bi | 10.79022284 | 9.60891305  | 8.87710516 |
| Bi | 10.69235238 | 8.27982236  | 4.60020939 |
| Bi | 8.17862152  | 4.47046610  | 5.87332151 |
| Bi | 5.79605470  | 6.95302201  | 8.84750592 |
| Bi | 5.89973991  | 8.31849249  | 4.61442917 |

**Pd<sub>15</sub>Bi<sub>7</sub>**

|    |             |             |             |
|----|-------------|-------------|-------------|
| Pd | 10.28640775 | 8.57925602  | 9.49785846  |
| Pd | 10.07808377 | 9.78928362  | 5.15617177  |
| Pd | 8.84631197  | 8.14799223  | 7.19149447  |
| Pd | 7.96832258  | 9.95215410  | 8.94908959  |
| Pd | 5.60670631  | 8.82482039  | 9.62470340  |
| Pd | 7.92434944  | 10.76046493 | 6.37499004  |
| Pd | 6.23752277  | 8.85005651  | 6.99024780  |
| Pd | 7.80811367  | 6.06410912  | 5.77350872  |
| Pd | 10.24696944 | 5.66940938  | 6.99401725  |
| Pd | 5.68785852  | 4.99199909  | 6.87082210  |
| Pd | 7.67734024  | 8.55255671  | 4.81425886  |
| Pd | 9.31592088  | 5.95929429  | 9.63699898  |
| Pd | 6.99785209  | 6.76725899  | 8.52184055  |
| Pd | 11.50996118 | 8.20611081  | 6.91577128  |
| Pd | 5.44125860  | 7.10925239  | 5.30958234  |
| Bi | 10.30960579 | 10.59534460 | 7.70404972  |
| Bi | 5.80519117  | 11.14451327 | 8.07353046  |
| Bi | 7.96364041  | 7.99657555  | 10.77800506 |
| Bi | 11.79925729 | 6.50366433  | 8.93256085  |
| Bi | 10.08437032 | 7.14993854  | 4.77529293  |
| Bi | 4.38822795  | 7.08765065  | 7.81098538  |
| Bi | 8.10034023  | 4.36391249  | 7.84368385  |

**Pd<sub>15</sub>Bi<sub>8</sub>**

|    |             |             |             |
|----|-------------|-------------|-------------|
| Pd | 6.60478449  | 10.69834481 | 6.68604206  |
| Pd | 8.50764744  | 9.10600555  | 5.49350742  |
| Pd | 11.18916473 | 9.56502511  | 6.10374679  |
| Pd | 7.05980047  | 8.07805517  | 7.49819954  |
| Pd | 4.44702709  | 8.01651695  | 7.32966839  |
| Pd | 8.79736833  | 6.32963909  | 6.13184292  |
| Pd | 6.15742730  | 6.18721979  | 5.96294688  |
| Pd | 10.96344099 | 6.49651487  | 9.49094168  |
| Pd | 10.61159136 | 10.28341043 | 9.26562534  |
| Pd | 8.28426341  | 6.20695966  | 9.05771704  |
| Pd | 6.46266775  | 7.90925781  | 10.17949444 |
| Pd | 7.96520349  | 10.02537867 | 9.05139237  |
| Pd | 9.63847122  | 8.25345896  | 7.88686263  |
| Pd | 11.45294675 | 6.60224945  | 6.65657762  |
| Pd | 7.42661418  | 4.32052327  | 7.35881356  |
| Bi | 9.26475619  | 11.22122120 | 7.00601560  |
| Bi | 5.86747076  | 8.67363401  | 5.04235781  |
| Bi | 5.31898394  | 9.93727182  | 8.89453753  |
| Bi | 10.41057772 | 7.59611956  | 4.43751570  |
| Bi | 5.58963361  | 5.83622164  | 8.59517998  |
| Bi | 9.14985759  | 8.20000408  | 10.68595450 |
| Bi | 10.06727901 | 4.59872369  | 7.75910735  |
| Bi | 12.33675368 | 8.48782828  | 8.26657084  |

**Pd<sub>15</sub>Bi<sub>9</sub>**

|    |             |             |             |
|----|-------------|-------------|-------------|
| Pd | 7.41032627  | 7.73715847  | 7.56738099  |
| Pd | 8.63811672  | 5.99387820  | 5.93662981  |
| Pd | 5.81471659  | 6.19187032  | 6.10161168  |
| Pd | 5.77376558  | 9.28280233  | 6.15176116  |
| Pd | 8.62376666  | 6.04687922  | 9.24713668  |
| Pd | 5.81896655  | 6.19316944  | 9.08995585  |
| Pd | 5.78035560  | 9.17754265  | 9.13624298  |
| Pd | 10.06037285 | 4.46057599  | 7.63081207  |
| Pd | 8.58904433  | 9.38563389  | 9.31116314  |
| Pd | 10.02444608 | 7.70116974  | 10.83033364 |
| Pd | 10.01352007 | 11.01765378 | 7.74317133  |
| Pd | 8.61020809  | 9.55920564  | 5.97856608  |
| Pd | 10.06298820 | 7.80961536  | 4.52720806  |
| Pd | 9.98172282  | 7.76267690  | 7.58606683  |
| Pd | 12.60482432 | 7.70616517  | 7.57306002  |
| Bi | 7.22795662  | 4.45383294  | 7.60212687  |
| Bi | 4.22450970  | 7.68896729  | 7.59606619  |
| Bi | 7.20899527  | 7.67725974  | 10.84853095 |
| Bi | 7.26276498  | 7.78680342  | 4.47176121  |
| Bi | 7.16577303  | 10.99034132 | 7.70528061  |
| Bi | 11.39239910 | 9.60891246  | 5.95346844  |
| Bi | 11.38770178 | 5.93555698  | 5.86113844  |
| Bi | 11.39857617 | 9.45379130  | 9.38769262  |
| Bi | 11.39988385 | 5.96715344  | 9.35731288  |

**Pd<sub>15</sub>Bi<sub>10</sub>**

|    |             |             |             |
|----|-------------|-------------|-------------|
| Pd | 8.85403057  | 6.06897897  | 8.95989090  |
| Pd | 8.64190281  | 6.32188970  | 5.50612008  |
| Pd | 9.90167114  | 8.63793920  | 4.71655540  |
| Pd | 10.03611009 | 7.92564051  | 7.26447458  |
| Pd | 10.20827047 | 4.70394531  | 7.10624908  |
| Pd | 12.51971146 | 8.62402302  | 6.03203629  |
| Pd | 10.90278330 | 7.72914964  | 9.75387097  |
| Pd | 12.32806256 | 6.37753900  | 7.76937599  |
| Pd | 8.26925120  | 9.91173945  | 6.50342023  |
| Pd | 7.34595163  | 7.59966600  | 7.48633624  |
| Pd | 6.06131865  | 5.79979418  | 9.02827624  |
| Pd | 5.82807538  | 6.25523691  | 5.80736760  |
| Pd | 5.75997167  | 8.71961776  | 9.42098745  |
| Pd | 5.52043265  | 9.35094679  | 6.54288557  |
| Pd | 8.54663543  | 9.16889607  | 9.21338855  |
| Bi | 7.47825074  | 4.53636556  | 7.11800826  |
| Bi | 10.82023120 | 10.54516439 | 6.62275697  |
| Bi | 11.33172526 | 6.31755919  | 5.29915845  |
| Bi | 11.14741551 | 4.99791107  | 9.65239301  |
| Bi | 13.14146951 | 8.72314689  | 8.61508129  |
| Bi | 10.78894700 | 10.43810383 | 9.71250899  |
| Bi | 7.10982576  | 8.35351288  | 4.60336377  |
| Bi | 4.32583238  | 7.31138692  | 7.73564610  |
| Bi | 6.70221152  | 10.93464783 | 8.35719861  |
| Bi | 7.48841943  | 7.28529602  | 10.83689936 |

**Pd<sub>15</sub>Bi<sub>11</sub>**

|    |             |             |             |
|----|-------------|-------------|-------------|
| Pd | 8.99173696  | 9.82123365  | 7.13474846  |
| Pd | 8.53458249  | 9.31009760  | 9.92906219  |
| Pd | 8.99237002  | 6.67123130  | 10.71511069 |
| Pd | 11.42816038 | 8.91906703  | 8.30110363  |
| Pd | 9.24023846  | 7.15073103  | 8.03029487  |
| Pd | 11.58570663 | 6.36584076  | 9.26909236  |
| Pd | 6.91391606  | 8.25143746  | 8.07102822  |
| Pd | 6.53592824  | 10.00281426 | 5.95076174  |
| Pd | 8.11967190  | 5.01421640  | 6.65339651  |
| Pd | 10.45791977 | 7.87946059  | 5.73845695  |
| Pd | 7.08819562  | 5.62788915  | 9.04383819  |
| Pd | 7.59267557  | 7.47087686  | 5.59604476  |
| Pd | 10.85606284 | 5.32753166  | 6.66263723  |
| Pd | 4.66119966  | 6.88090009  | 8.68735960  |
| Pd | 4.64136950  | 9.61769206  | 8.19716870  |
| Bi | 6.92325797  | 11.00140602 | 8.44337674  |
| Bi | 6.42445845  | 7.68428136  | 10.63891337 |
| Bi | 10.29299923 | 11.26475027 | 9.05114732  |
| Bi | 10.92082311 | 8.46415422  | 10.85668843 |
| Bi | 11.38593360 | 10.48193886 | 6.08081176  |
| Bi | 12.78224033 | 7.10504281  | 6.94438651  |
| Bi | 5.51346878  | 5.01607644  | 6.96928083  |
| Bi | 9.35824417  | 5.79357345  | 4.43931663  |
| Bi | 4.85849178  | 7.90587629  | 6.11162446  |
| Bi | 8.73858162  | 9.55743612  | 4.40241555  |
| Bi | 9.58811319  | 4.61211937  | 8.96717729  |

**Pd<sub>15</sub>Bi<sub>12</sub>**

|    |             |             |             |
|----|-------------|-------------|-------------|
| Pd | 8.74815313  | 5.57130561  | 8.40037258  |
| Pd | 11.49422291 | 7.86078532  | 7.12794283  |
| Pd | 9.82204456  | 10.77751200 | 8.18914209  |
| Pd | 6.49842657  | 7.79314626  | 8.89703161  |
| Pd | 7.67755357  | 6.32643899  | 10.81204323 |
| Pd | 10.99883260 | 6.80210733  | 9.53336346  |
| Pd | 10.81019169 | 9.40868851  | 10.26660399 |
| Pd | 8.23853852  | 8.97564359  | 10.65945260 |
| Pd | 9.37637866  | 6.80275290  | 5.93099790  |
| Pd | 9.75102701  | 9.43205796  | 5.81889868  |
| Pd | 7.13330512  | 9.11866849  | 6.49680818  |
| Pd | 7.15203408  | 10.56571830 | 8.79449124  |
| Pd | 6.67566725  | 6.52047965  | 6.53957233  |
| Pd | 9.02719892  | 8.19113701  | 8.23511480  |
| Pd | 4.74599613  | 9.81466812  | 9.40264789  |
| Bi | 6.12460986  | 5.11834501  | 8.81686763  |
| Bi | 11.22172619 | 5.16989337  | 7.27075737  |
| Bi | 12.05177740 | 10.53920173 | 6.87463335  |
| Bi | 9.77263200  | 4.61967842  | 10.61692241 |
| Bi | 13.02445279 | 8.67768312  | 9.11245663  |
| Bi | 8.99157753  | 11.49920512 | 10.57044836 |
| Bi | 5.79003558  | 8.36038798  | 11.38428735 |
| Bi | 8.25721550  | 4.38341781  | 6.07707114  |
| Bi | 8.03506691  | 11.56351952 | 6.43420775  |
| Bi | 4.66148195  | 8.49987841  | 7.08960717  |
| Bi | 9.97329687  | 7.43923145  | 12.00574617 |
| Bi | 7.84186937  | 8.04657889  | 4.24469676  |

**Pd<sub>15</sub>Bi<sub>13</sub>**

|    |             |             |             |
|----|-------------|-------------|-------------|
| Pd | 9.36988120  | 10.46782092 | 6.13527795  |
| Pd | 6.63227164  | 9.66228385  | 6.47958356  |
| Pd | 10.21311282 | 10.19126286 | 8.89500560  |
| Pd | 7.56489164  | 12.03790686 | 7.40268607  |
| Pd | 7.47273884  | 9.87905163  | 9.17950630  |
| Pd | 8.25486149  | 8.35613491  | 4.74933814  |
| Pd | 5.31347525  | 8.26704516  | 8.51199545  |
| Pd | 7.83786448  | 7.11454151  | 9.59629243  |
| Pd | 10.60622599 | 7.50372213  | 9.50012405  |
| Pd | 8.53276220  | 5.42095576  | 7.58162333  |
| Pd | 10.12571618 | 6.43053598  | 5.56547566  |
| Pd | 6.58537965  | 6.95162468  | 6.54568777  |
| Pd | 8.92994472  | 8.23225527  | 7.43866450  |
| Pd | 11.94548933 | 10.56174499 | 6.88055212  |
| Pd | 11.75474488 | 7.89452571  | 7.13776096  |
| Bi | 7.42073011  | 11.37102866 | 4.69917472  |
| Bi | 10.23852481 | 12.61642046 | 7.53341592  |
| Bi | 5.17405271  | 11.03198692 | 8.28770010  |
| Bi | 4.46248267  | 8.28971471  | 5.92130176  |
| Bi | 8.52467500  | 12.14144780 | 10.01923926 |
| Bi | 6.09121948  | 8.52604425  | 11.05215608 |
| Bi | 9.23215852  | 9.03344145  | 11.22624180 |
| Bi | 9.47932446  | 5.13068894  | 10.17210140 |
| Bi | 12.68224815 | 9.26288208  | 9.16211775  |
| Bi | 11.28551593 | 5.33152071  | 7.71923776  |
| Bi | 7.81453010  | 5.60386599  | 4.77288739  |
| Bi | 10.96997801 | 8.83530308  | 4.79729912  |
| Bi | 5.86891609  | 5.57059546  | 8.66174644  |

**Pd<sub>15</sub>Bi<sub>14</sub>**

|    |             |             |             |
|----|-------------|-------------|-------------|
| Pd | 11.63682179 | 9.33948236  | 9.17024434  |
| Pd | 8.02234138  | 9.89165896  | 10.23386803 |
| Pd | 10.05134307 | 8.44527231  | 11.16854569 |
| Pd | 9.02662721  | 10.99034658 | 8.07001715  |
| Pd | 10.61626923 | 9.39345875  | 6.62113876  |
| Pd | 7.00530214  | 9.36187029  | 7.37898096  |
| Pd | 11.34667330 | 6.65058939  | 9.10365731  |
| Pd | 7.89405207  | 6.91848600  | 10.55263677 |
| Pd | 9.11226467  | 5.22659068  | 8.76612359  |
| Pd | 10.43403272 | 6.60223016  | 6.50629173  |
| Pd | 8.13942315  | 7.63866091  | 5.63885803  |
| Pd | 6.89728476  | 6.63761182  | 7.89461349  |
| Pd | 5.85440498  | 8.42464377  | 9.73169440  |
| Pd | 9.17485467  | 8.14662659  | 8.47051629  |
| Pd | 4.25158797  | 9.33129874  | 7.79501089  |
| Bi | 10.33179477 | 11.24963989 | 10.57217660 |
| Bi | 12.83729207 | 7.88502507  | 7.14832674  |
| Bi | 12.67870028 | 7.84974026  | 11.07360907 |
| Bi | 11.60337488 | 11.62334251 | 7.74848588  |
| Bi | 5.94083294  | 11.07014901 | 9.04761506  |
| Bi | 8.44794637  | 10.36379102 | 5.35300380  |
| Bi | 10.48241130 | 8.07213464  | 4.29733079  |
| Bi | 10.13341450 | 5.72977854  | 11.37998012 |
| Bi | 11.45432178 | 4.44167315  | 7.66042189  |
| Bi | 5.36462899  | 7.78333509  | 5.93195548  |
| Bi | 6.64251552  | 4.74183615  | 9.78925267  |
| Bi | 8.29093558  | 4.95556266  | 6.22629944  |
| Bi | 6.81732134  | 8.62389157  | 12.19465628 |
| Bi | 4.22773245  | 6.65966079  | 8.72254640  |

**Pd<sub>15</sub>Bi<sub>15</sub>**

|    |             |             |             |
|----|-------------|-------------|-------------|
| Pd | 8.32760812  | 11.14533490 | 9.80683423  |
| Pd | 6.01059345  | 8.33750878  | 8.51834021  |
| Pd | 7.99304520  | 6.60457105  | 7.13973952  |
| Pd | 11.27792873 | 9.52667108  | 8.08905229  |
| Pd | 9.51114579  | 11.48327179 | 7.13769956  |
| Pd | 6.97870635  | 10.64126173 | 7.36516378  |
| Pd | 6.90917569  | 8.49869094  | 5.61001568  |
| Pd | 9.56350731  | 9.08733061  | 5.90902789  |
| Pd | 10.37666218 | 9.61199976  | 10.67730157 |
| Pd | 7.03896393  | 8.96200520  | 10.92465129 |
| Pd | 7.81387607  | 6.63831451  | 9.88762010  |
| Pd | 10.49433616 | 7.07763766  | 9.66158219  |
| Pd | 10.67455112 | 6.88645362  | 6.97592880  |
| Pd | 8.69879272  | 8.82687548  | 8.53008244  |
| Pd | 6.48634422  | 4.75796569  | 8.43694070  |
| Bi | 10.87317280 | 11.96274757 | 9.36376411  |
| Bi | 5.55448697  | 10.88645609 | 9.71666120  |
| Bi | 5.19071037  | 6.38264028  | 10.06899441 |
| Bi | 7.60906653  | 13.12294732 | 8.14127867  |
| Bi | 4.62097381  | 9.62341502  | 6.67958678  |
| Bi | 9.04290761  | 6.77332297  | 4.77037998  |
| Bi | 11.63544775 | 10.73092093 | 5.72300976  |
| Bi | 8.52917556  | 10.58524206 | 12.40752231 |
| Bi | 9.34339370  | 4.81654904  | 8.54804407  |
| Bi | 12.83892603 | 8.38190533  | 9.92342726  |
| Bi | 7.92905747  | 10.91600759 | 4.86395294  |
| Bi | 9.17421231  | 7.53067991  | 12.01853610 |
| Bi | 5.32623328  | 6.40193710  | 6.64507326  |
| Bi | 13.09227978 | 8.00594642  | 6.69549187  |
| Bi | 12.54372140 | 5.62491957  | 8.54033202  |

**Pd<sub>16</sub>**

|    |             |             |            |
|----|-------------|-------------|------------|
| Pd | 5.67996058  | 6.18129219  | 8.43694157 |
| Pd | 6.44304727  | 8.72973873  | 8.55032617 |
| Pd | 5.66251727  | 6.22839811  | 5.84284858 |
| Pd | 4.38608557  | 8.01620580  | 7.18933894 |
| Pd | 7.71395913  | 10.49636407 | 7.18142506 |
| Pd | 6.42380536  | 8.76078284  | 5.81076373 |
| Pd | 7.75166770  | 6.93848819  | 4.38506300 |
| Pd | 7.76418036  | 4.69636874  | 8.39933275 |
| Pd | 9.06114090  | 8.78450357  | 5.81541474 |
| Pd | 7.77125072  | 6.85486751  | 9.91327397 |
| Pd | 9.84565573  | 6.25030988  | 5.83576472 |
| Pd | 11.12064545 | 8.04511999  | 7.17295306 |
| Pd | 7.75689294  | 4.74470009  | 5.84317773 |
| Pd | 7.75559050  | 7.03248121  | 7.15062819 |
| Pd | 9.05810189  | 8.74969566  | 8.53083484 |
| Pd | 9.84683413  | 6.19783543  | 8.42844095 |

**Pd<sub>16</sub>Bi**

|    |             |             |            |
|----|-------------|-------------|------------|
| Pd | 8.36358604  | 5.10112173  | 5.02749418 |
| Pd | 6.35445985  | 6.64065986  | 4.28723188 |
| Pd | 6.72223251  | 9.18662645  | 4.71197526 |
| Pd | 8.28056368  | 4.57137975  | 7.59746581 |
| Pd | 6.12997156  | 5.02665534  | 6.32056227 |
| Pd | 5.14240793  | 7.76305557  | 6.27628544 |
| Pd | 4.47165583  | 6.01090357  | 7.99868583 |
| Pd | 6.81166413  | 6.20001626  | 8.93008402 |
| Pd | 7.96829826  | 8.71850432  | 8.76298136 |
| Pd | 5.35064947  | 8.32823077  | 8.86348274 |
| Pd | 9.92527091  | 6.47343709  | 6.56341648 |
| Pd | 10.40098754 | 8.48482793  | 7.99295313 |
| Pd | 9.34637999  | 6.40074164  | 9.09980498 |
| Pd | 8.83811025  | 7.67350720  | 4.50631469 |
| Pd | 7.54449669  | 7.19324981  | 6.71527788 |
| Pd | 8.77388344  | 9.50996734  | 6.33922111 |
| Bi | 6.27018545  | 10.10195335 | 7.14126150 |

**Pd<sub>16</sub>Bi<sub>2</sub>**

|    |             |             |             |
|----|-------------|-------------|-------------|
| Pd | 5.92536120  | 6.68204764  | 8.92989299  |
| Pd | 6.20057405  | 9.25929907  | 8.92131487  |
| Pd | 8.72632472  | 9.85414794  | 8.85805684  |
| Pd | 7.97917814  | 7.79374342  | 7.48138074  |
| Pd | 10.27356467 | 6.20889619  | 7.18382270  |
| Pd | 10.54960601 | 8.90011202  | 7.11350296  |
| Pd | 7.82158050  | 7.80124211  | 10.36762684 |
| Pd | 8.01552440  | 5.70159447  | 6.00441353  |
| Pd | 5.57995665  | 6.69353000  | 6.25085968  |
| Pd | 9.65899219  | 7.56353377  | 5.04892738  |
| Pd | 8.43506367  | 9.78156691  | 5.91387501  |
| Pd | 5.85859086  | 9.31227416  | 6.23093823  |
| Pd | 4.16762285  | 8.17741055  | 7.78148100  |
| Pd | 6.99196826  | 11.23264071 | 7.47207416  |
| Pd | 8.27708247  | 5.62949773  | 8.85915698  |
| Pd | 6.25638988  | 4.57016777  | 7.50640149  |
| Bi | 7.14105083  | 7.82592528  | 4.46073920  |
| Bi | 10.22359432 | 7.61272827  | 9.41631825  |

**Pd<sub>16</sub>Bi<sub>3</sub>**

|    |             |             |            |
|----|-------------|-------------|------------|
| Pd | 4.57652639  | 6.77350180  | 8.36338330 |
| Pd | 5.58645682  | 9.11777909  | 7.49299489 |
| Pd | 6.38651652  | 5.79068115  | 4.66159865 |
| Pd | 6.81962366  | 6.84113945  | 6.93445211 |
| Pd | 6.86355956  | 7.61541444  | 9.34169818 |
| Pd | 7.65608247  | 10.05953778 | 9.02489544 |
| Pd | 6.62847739  | 8.56262609  | 4.92421219 |
| Pd | 6.59461666  | 5.05376789  | 8.76521944 |
| Pd | 11.15845115 | 7.32010085  | 8.24917218 |
| Pd | 8.92672958  | 6.05553907  | 8.51343809 |
| Pd | 11.03090540 | 7.98738403  | 5.70903053 |
| Pd | 9.13113183  | 9.45425952  | 4.78256047 |
| Pd | 8.73244951  | 6.86325089  | 5.08148374 |
| Pd | 8.93990722  | 8.58051299  | 7.27976880 |
| Pd | 8.05255546  | 4.60397382  | 6.50365010 |
| Pd | 9.33089605  | 8.21312748  | 9.86188342 |
| Bi | 4.44475001  | 7.30155480  | 5.78458754 |
| Bi | 7.44726156  | 10.64346861 | 6.43925012 |
| Bi | 10.54867592 | 5.47860420  | 6.45335880 |

**Pd<sub>16</sub>Bi<sub>4</sub>**

|    |             |            |            |
|----|-------------|------------|------------|
| Pd | 10.55787522 | 9.15764532 | 6.36273650 |
| Pd | 10.80770765 | 6.73947824 | 5.50548687 |
| Pd | 8.46164741  | 5.55154689 | 5.24072577 |
| Pd | 8.51834687  | 8.11091325 | 4.99590234 |
| Pd | 9.35528705  | 7.16362988 | 7.66526102 |
| Pd | 7.74298532  | 4.53670998 | 7.57964211 |
| Pd | 9.55958556  | 5.27930197 | 9.39766176 |
| Pd | 8.02896040  | 9.70942020 | 6.97849978 |
| Pd | 4.45050158  | 7.29691926 | 6.32990295 |
| Pd | 6.25884239  | 6.83358741 | 4.30105291 |
| Pd | 6.88960275  | 7.09850468 | 6.97541722 |
| Pd | 6.08932526  | 9.19503622 | 5.21111619 |
| Pd | 4.94230469  | 7.45937724 | 9.03762399 |
| Pd | 5.09654188  | 5.17457054 | 7.91113082 |
| Pd | 7.48073315  | 8.46377652 | 9.26340056 |
| Pd | 7.05128872  | 5.99178812 | 9.54525717 |
| Bi | 5.97129190  | 4.60274403 | 5.55493515 |
| Bi | 10.32864547 | 4.59568620 | 6.96707450 |
| Bi | 5.46033914  | 9.59791496 | 7.70317089 |
| Bi | 9.90054702  | 9.45018329 | 8.87601564 |

**Pd<sub>16</sub>Bi<sub>5</sub>**

|    |             |             |            |
|----|-------------|-------------|------------|
| Pd | 11.97578089 | 8.02618612  | 6.93779550 |
| Pd | 10.26569855 | 5.89058128  | 7.55686764 |
| Pd | 10.57314148 | 10.39744652 | 7.64184728 |
| Pd | 8.26495606  | 8.26233624  | 4.33559322 |
| Pd | 8.11962599  | 6.02452332  | 5.81257939 |
| Pd | 8.42053039  | 10.46365098 | 5.83076461 |
| Pd | 10.52908460 | 6.77736825  | 4.92462863 |
| Pd | 6.00827190  | 9.74560625  | 4.88720717 |
| Pd | 9.43495866  | 8.19313148  | 6.80947556 |
| Pd | 6.18293480  | 10.66584164 | 7.45720154 |
| Pd | 8.11452033  | 6.87815860  | 8.89619924 |
| Pd | 7.02494007  | 8.31581414  | 6.83111805 |
| Pd | 8.29259249  | 9.55324076  | 8.92254362 |
| Pd | 10.48815699 | 8.09755044  | 9.15025309 |
| Pd | 4.45129340  | 8.55572288  | 6.84674490 |
| Pd | 5.85671622  | 6.02218243  | 7.46002267 |
| Bi | 5.77545392  | 7.02723403  | 4.87357170 |
| Bi | 8.46157328  | 11.98984839 | 7.97446407 |
| Bi | 5.82053193  | 8.29288327  | 9.20764373 |
| Bi | 8.02680184  | 4.44987599  | 7.90365923 |
| Bi | 10.84599770 | 9.46514399  | 4.94506800 |

**Pd<sub>16</sub>Bi<sub>6</sub>**

|    |             |             |            |
|----|-------------|-------------|------------|
| Pd | 11.23295165 | 5.84608101  | 6.83556682 |
| Pd | 8.82119823  | 6.72701052  | 6.85917461 |
| Pd | 8.92932349  | 4.15710783  | 6.86331969 |
| Pd | 6.91723261  | 5.39853714  | 8.27302041 |
| Pd | 10.58752529 | 8.14222219  | 8.24901458 |
| Pd | 10.71179933 | 10.47773427 | 6.84172955 |
| Pd | 10.54467930 | 8.15026456  | 5.43661313 |
| Pd | 7.93503564  | 7.79062098  | 4.46699181 |
| Pd | 6.89551528  | 5.39271177  | 5.47427579 |
| Pd | 4.28466246  | 8.87811391  | 6.88539023 |
| Pd | 6.52905719  | 7.67255417  | 6.87184320 |
| Pd | 4.59222124  | 5.98089001  | 6.87749809 |
| Pd | 7.97944082  | 7.80499327  | 9.25776719 |
| Pd | 6.38301808  | 9.89047341  | 8.36414373 |
| Pd | 8.46018140  | 9.30533781  | 6.86451381 |
| Pd | 6.36351226  | 9.89296562  | 5.38400345 |
| Bi | 9.61691171  | 5.63035908  | 9.14455961 |
| Bi | 9.57408163  | 5.61191974  | 4.56543080 |
| Bi | 5.24426622  | 7.47741214  | 9.16133212 |
| Bi | 9.13924179  | 10.23430746 | 9.19839086 |
| Bi | 5.20737062  | 7.48774795  | 4.59580524 |
| Bi | 9.06223675  | 10.23696786 | 4.50966426 |

**Pd<sub>16</sub>Bi<sub>7</sub>**

|    |             |             |            |
|----|-------------|-------------|------------|
| Pd | 10.19701148 | 7.62171216  | 6.91362758 |
| Pd | 12.39066922 | 8.97508217  | 6.95291945 |
| Pd | 12.25169834 | 6.04750691  | 6.87378289 |
| Pd | 8.81704425  | 7.60069528  | 9.34111325 |
| Pd | 10.19402728 | 9.81140974  | 8.39573125 |
| Pd | 9.92527823  | 5.30332567  | 8.23313230 |
| Pd | 6.12193885  | 7.79484195  | 8.70459326 |
| Pd | 7.90943735  | 6.59572113  | 6.89637951 |
| Pd | 7.88630127  | 4.01451074  | 6.87357558 |
| Pd | 5.55159744  | 5.63049401  | 6.89050577 |
| Pd | 6.14497203  | 7.82390753  | 5.10969820 |
| Pd | 5.77784744  | 10.02133787 | 6.92154676 |
| Pd | 8.12561998  | 9.13659775  | 6.93134554 |
| Pd | 8.84081490  | 7.68190440  | 4.48813206 |
| Pd | 10.20162498 | 9.87617544  | 5.51873167 |
| Pd | 9.93489968  | 5.34645767  | 5.52134376 |
| Bi | 7.52754614  | 9.96797575  | 9.34970964 |
| Bi | 11.53715514 | 7.44027793  | 9.16689120 |
| Bi | 7.27436978  | 5.36742942  | 9.21882888 |
| Bi | 7.31453636  | 5.41906145  | 4.54393951 |
| Bi | 11.55874768 | 7.57564652  | 4.66474508 |
| Bi | 7.53241690  | 10.03406535 | 4.53098964 |
| Bi | 4.21572426  | 7.92332025  | 6.89524622 |

**Pd<sub>16</sub>Bi<sub>8</sub>**

|    |             |             |             |
|----|-------------|-------------|-------------|
| Pd | 7.32260885  | 7.96019201  | 10.89291351 |
| Pd | 8.62246443  | 6.07628984  | 9.48908071  |
| Pd | 8.42487939  | 6.26206379  | 6.01923888  |
| Pd | 4.53244211  | 7.79647803  | 7.67082237  |
| Pd | 7.06310389  | 4.70945561  | 7.78362220  |
| Pd | 6.84706113  | 8.15576513  | 4.85033086  |
| Pd | 7.21926617  | 7.75478816  | 7.84302722  |
| Pd | 6.02671218  | 9.57235263  | 9.21341663  |
| Pd | 8.73286800  | 9.57047485  | 9.34599748  |
| Pd | 7.47602903  | 11.44020689 | 7.95943628  |
| Pd | 11.26786572 | 9.37351313  | 6.09670550  |
| Pd | 11.38762670 | 6.16222587  | 9.25782711  |
| Pd | 11.45463663 | 9.29007028  | 9.15370180  |
| Pd | 9.87940622  | 7.70290464  | 7.70967186  |
| Pd | 11.15468578 | 6.27811171  | 5.83090870  |
| Pd | 8.55511173  | 9.56889689  | 6.34461110  |
| Bi | 5.79584497  | 6.25994932  | 9.60804565  |
| Bi | 9.85707529  | 4.61529837  | 7.62094384  |
| Bi | 5.68840628  | 6.09273225  | 6.00944905  |
| Bi | 10.05947613 | 7.83460169  | 10.94745460 |
| Bi | 5.79689039  | 9.96064275  | 6.55118876  |
| Bi | 9.61890726  | 8.04688547  | 4.41448234  |
| Bi | 12.69701105 | 7.65572345  | 7.50046085  |
| Bi | 10.17671781 | 11.21629350 | 7.76943316  |

**Pd<sub>16</sub>Bi<sub>9</sub>**

|    |             |             |             |
|----|-------------|-------------|-------------|
| Pd | 11.66623096 | 9.20716593  | 9.07645659  |
| Pd | 8.39528475  | 9.17920216  | 6.20233875  |
| Pd | 9.81737595  | 7.66009318  | 7.88712030  |
| Pd | 11.23475925 | 9.17234544  | 6.16466475  |
| Pd | 7.22037508  | 10.79878435 | 8.02309618  |
| Pd | 8.90448790  | 9.39531928  | 9.67727254  |
| Pd | 4.93774558  | 8.99848843  | 7.90865730  |
| Pd | 6.18047622  | 7.71141889  | 5.97407497  |
| Pd | 11.24168463 | 6.26633796  | 6.07857976  |
| Pd | 11.68095166 | 6.08806320  | 9.00642988  |
| Pd | 8.40413764  | 6.24690291  | 6.11704092  |
| Pd | 8.91937917  | 5.83993271  | 9.62810585  |
| Pd | 4.93972426  | 6.32212744  | 7.84322766  |
| Pd | 7.64207279  | 7.59187877  | 11.20868174 |
| Pd | 7.24601263  | 4.53806062  | 7.88649057  |
| Pd | 7.23427701  | 7.64381806  | 8.40783375  |
| Bi | 9.96279189  | 10.88111103 | 7.75049895  |
| Bi | 13.03549480 | 7.69117085  | 7.39926336  |
| Bi | 6.19743147  | 9.57383947  | 10.13902690 |
| Bi | 9.78645054  | 7.77225504  | 4.41838942  |
| Bi | 9.98087294  | 4.48170359  | 7.59649686  |
| Bi | 10.51585010 | 7.60250899  | 10.89922918 |
| Bi | 6.20265109  | 5.65411095  | 10.05064337 |
| Bi | 5.92123498  | 10.28179981 | 5.78115517  |
| Bi | 5.95209216  | 5.14430526  | 5.66788129  |

**Pd<sub>16</sub>Bi<sub>10</sub>**

|    |             |             |             |
|----|-------------|-------------|-------------|
| Pd | 8.71745680  | 9.77132911  | 8.65052122  |
| Pd | 8.49845727  | 8.64109936  | 5.10000571  |
| Pd | 9.99446446  | 10.56082669 | 6.39215526  |
| Pd | 5.94345674  | 7.03202368  | 9.70851133  |
| Pd | 5.79282963  | 5.65740907  | 7.10837967  |
| Pd | 7.39858737  | 7.77700334  | 7.53403345  |
| Pd | 5.90238313  | 9.75726268  | 8.61993000  |
| Pd | 5.74081142  | 8.49952308  | 5.64698117  |
| Pd | 8.64679156  | 5.46848612  | 7.16945474  |
| Pd | 9.95247731  | 6.27344132  | 4.91846810  |
| Pd | 8.72161252  | 6.92691191  | 9.69310833  |
| Pd | 11.01911932 | 8.49578234  | 9.61124534  |
| Pd | 12.37558731 | 9.35776067  | 7.32685995  |
| Pd | 12.39871249 | 6.63134689  | 6.38976196  |
| Pd | 10.01357722 | 7.83747352  | 7.21879345  |
| Pd | 11.06728632 | 5.90350973  | 8.72405370  |
| Bi | 11.01148855 | 11.07304561 | 8.83564878  |
| Bi | 7.25206224  | 10.61596400 | 6.45700436  |
| Bi | 11.28365270 | 8.63828608  | 4.97276216  |
| Bi | 7.20625971  | 6.29522110  | 4.92847085  |
| Bi | 4.34067249  | 7.77660144  | 7.79801703  |
| Bi | 7.37159307  | 9.00354947  | 10.77038288 |
| Bi | 7.19237744  | 4.74468340  | 9.23020505  |
| Bi | 10.73103086 | 6.47105145  | 11.29379357 |
| Bi | 13.31612457 | 7.35474772  | 8.80547178  |
| Bi | 10.97496475 | 4.38464467  | 6.53727182  |

**Pd<sub>16</sub>Bi<sub>11</sub>**

|    |             |             |             |
|----|-------------|-------------|-------------|
| Pd | 8.54632760  | 5.88635928  | 6.27589511  |
| Pd | 8.03239681  | 8.47674014  | 5.81742440  |
| Pd | 8.60418973  | 10.48293070 | 8.03732222  |
| Pd | 7.52657031  | 8.00254993  | 8.43615972  |
| Pd | 5.93634985  | 6.11242744  | 7.24986829  |
| Pd | 5.37598559  | 8.62626928  | 6.22485130  |
| Pd | 5.90186617  | 10.25534158 | 8.48187749  |
| Pd | 11.26703406 | 6.43970266  | 5.96167396  |
| Pd | 9.17972034  | 5.85928307  | 8.88807293  |
| Pd | 10.05255811 | 8.21809814  | 7.68788146  |
| Pd | 9.71437008  | 10.57086106 | 5.64549788  |
| Pd | 12.13949447 | 9.11720586  | 5.95971903  |
| Pd | 8.76557478  | 7.64586954  | 10.81314502 |
| Pd | 12.66005605 | 8.79832760  | 8.77637996  |
| Pd | 10.30585770 | 9.85903708  | 10.03880609 |
| Pd | 11.84836885 | 6.11852712  | 8.58151759  |
| Bi | 7.39219358  | 3.99214922  | 7.83200787  |
| Bi | 6.42357780  | 6.61331363  | 4.73406722  |
| Bi | 4.61506254  | 7.94755781  | 8.66551822  |
| Bi | 6.86368944  | 10.86076191 | 6.04271909  |
| Bi | 7.64700262  | 10.00449449 | 10.49447524 |
| Bi | 6.67136073  | 5.98468285  | 10.13225814 |
| Bi | 10.55408987 | 4.19779536  | 7.21935899  |
| Bi | 10.21388925 | 8.24023124  | 4.37769952  |
| Bi | 11.34654958 | 10.88329109 | 7.78468921  |
| Bi | 13.62646156 | 7.16361509  | 6.93675545  |
| Bi | 11.37911051 | 7.52723485  | 10.71241200 |

**Pd<sub>16</sub>Bi<sub>12</sub>**

|    |             |             |             |
|----|-------------|-------------|-------------|
| Pd | 8.36546370  | 10.13898180 | 8.31586642  |
| Pd | 8.42115213  | 7.80946519  | 9.67808534  |
| Pd | 8.60111536  | 5.30402336  | 8.03178853  |
| Pd | 7.30010285  | 7.60927882  | 7.15527428  |
| Pd | 5.76216858  | 9.78998095  | 7.85696537  |
| Pd | 5.65197241  | 7.58492215  | 9.59857779  |
| Pd | 5.86519127  | 5.35237056  | 7.88361325  |
| Pd | 10.91113839 | 9.39239411  | 9.02177819  |
| Pd | 9.00910953  | 9.71173714  | 5.76648535  |
| Pd | 9.94899701  | 7.56613727  | 7.34040772  |
| Pd | 9.85432848  | 5.60260749  | 10.33115301 |
| Pd | 12.05372601 | 6.98218209  | 9.41944052  |
| Pd | 8.44385325  | 7.30964401  | 4.71267162  |
| Pd | 12.56213108 | 6.72616641  | 6.67023931  |
| Pd | 10.08044530 | 5.28382165  | 5.77540951  |
| Pd | 11.66608951 | 9.44755481  | 6.30344553  |
| Bi | 7.21436093  | 11.67488484 | 6.49374969  |
| Bi | 6.74309340  | 9.85096815  | 10.41084745 |
| Bi | 4.48909868  | 7.52498564  | 7.23666633  |
| Bi | 7.10132041  | 5.49231794  | 10.27033480 |
| Bi | 7.36237442  | 5.11703417  | 5.67498548  |
| Bi | 6.38257661  | 9.10547889  | 5.03342733  |
| Bi | 10.49926231 | 11.71695980 | 6.99755186  |
| Bi | 11.32872106 | 4.84056207  | 8.10262111  |
| Bi | 13.43065938 | 8.79917385  | 8.09977098  |
| Bi | 11.05276552 | 7.49231904  | 4.64462686  |
| Bi | 10.50337678 | 8.03553649  | 11.28307872 |
| Bi | 9.84123374  | 11.61002923 | 9.93341281  |

**Pd<sub>16</sub>Bi<sub>13</sub>**

|    |             |             |             |
|----|-------------|-------------|-------------|
| Pd | 10.28052993 | 12.36033414 | 7.80697866  |
| Pd | 11.26198204 | 6.61799522  | 8.37423471  |
| Pd | 9.40699898  | 10.18409501 | 6.48300382  |
| Pd | 12.11732066 | 10.23105069 | 8.26219486  |
| Pd | 8.20871831  | 10.95631445 | 8.95887679  |
| Pd | 11.55554240 | 8.57871364  | 6.17630557  |
| Pd | 9.84674954  | 8.83626366  | 8.97747255  |
| Pd | 7.55509787  | 8.35406359  | 10.26898624 |
| Pd | 8.17738807  | 6.31684842  | 8.48869403  |
| Pd | 7.38944733  | 8.71460262  | 7.54060484  |
| Pd | 6.88694822  | 10.29319893 | 5.36034090  |
| Pd | 5.72154758  | 10.98449475 | 7.80879326  |
| Pd | 4.96139726  | 8.56515746  | 9.12721574  |
| Pd | 5.66344838  | 6.47957414  | 7.37716686  |
| Pd | 6.75326194  | 7.56010605  | 5.10200094  |
| Pd | 9.28370327  | 7.22905643  | 6.23510168  |
| Bi | 10.56521426 | 11.21777458 | 10.18928347 |
| Bi | 11.49050440 | 5.82174673  | 5.78947029  |
| Bi | 9.68058829  | 6.45347808  | 10.66191671 |
| Bi | 11.79688568 | 11.27814863 | 5.89481009  |
| Bi | 13.57474949 | 7.97648892  | 7.75553401  |
| Bi | 7.74887342  | 12.39631742 | 6.74798180  |
| Bi | 6.06984342  | 10.58339056 | 10.41403008 |
| Bi | 4.78470453  | 8.86533967  | 6.46090294  |
| Bi | 5.94640682  | 6.25470018  | 9.99116648  |
| Bi | 7.57987676  | 5.15604744  | 6.01815629  |
| Bi | 8.92568608  | 8.87359050  | 4.20991616  |
| Bi | 9.94628780  | 4.29765071  | 8.00042732  |
| Bi | 12.18205927 | 8.32776083  | 10.40463139 |

**Pd<sub>16</sub>Bi<sub>14</sub>**

|    |             |             |             |
|----|-------------|-------------|-------------|
| Pd | 8.65438333  | 7.91425285  | 5.47108683  |
| Pd | 11.36335409 | 10.39542428 | 7.27130680  |
| Pd | 7.07141076  | 9.79439307  | 9.34146969  |
| Pd | 8.10450200  | 6.16425271  | 7.54162296  |
| Pd | 6.39388840  | 8.46581828  | 6.98424395  |
| Pd | 8.53478978  | 10.45523074 | 6.79235485  |
| Pd | 5.36980095  | 6.08390049  | 7.80853137  |
| Pd | 11.21701980 | 7.76639799  | 6.23922742  |
| Pd | 7.62578497  | 12.36322301 | 8.73649569  |
| Pd | 9.32571672  | 8.37129424  | 8.31007186  |
| Pd | 9.71479272  | 10.83619180 | 9.29392338  |
| Pd | 6.68329108  | 7.24924500  | 9.76360948  |
| Pd | 10.30229513 | 8.76971580  | 10.87633907 |
| Pd | 12.10902746 | 8.20380902  | 8.89537824  |
| Pd | 9.16686010  | 6.42129505  | 10.18067009 |
| Pd | 10.71840058 | 5.75555827  | 8.15399665  |
| Bi | 6.92617713  | 9.85945464  | 4.71360766  |
| Bi | 9.90145465  | 5.50348285  | 5.60856544  |
| Bi | 5.74893488  | 11.13069794 | 7.32558748  |
| Bi | 9.89849548  | 12.65472865 | 7.31005785  |
| Bi | 6.48434139  | 6.28900208  | 5.37789283  |
| Bi | 4.55601267  | 8.53155793  | 8.92512308  |
| Bi | 10.41340815 | 9.88350945  | 4.79227813  |
| Bi | 8.31458464  | 10.81710391 | 11.48626243 |
| Bi | 7.28243167  | 4.66105594  | 9.50393850  |
| Bi | 13.63599243 | 9.03391187  | 6.77312537  |
| Bi | 12.24944342 | 10.58343830 | 9.94717392  |
| Bi | 11.79535602 | 6.27579651  | 10.63312268 |
| Bi | 7.87015061  | 7.90108119  | 11.99078877 |
| Bi | 13.22324311 | 6.14436808  | 7.36328374  |

**Pd<sub>16</sub>Bi<sub>15</sub>**

|    |             |             |             |
|----|-------------|-------------|-------------|
| Pd | 10.38153309 | 6.04221043  | 7.85056407  |
| Pd | 6.45203000  | 6.38258992  | 7.97764480  |
| Pd | 9.14433063  | 9.82295251  | 6.49950328  |
| Pd | 11.58454736 | 7.38016405  | 9.89102091  |
| Pd | 11.43508185 | 8.19848077  | 6.43096081  |
| Pd | 8.45011681  | 7.23315087  | 6.13713732  |
| Pd | 13.16312877 | 9.09138495  | 8.34775052  |
| Pd | 8.65863952  | 7.91026299  | 8.84172616  |
| Pd | 6.52130414  | 9.11532884  | 6.98685450  |
| Pd | 10.59352130 | 9.73542777  | 8.74876458  |
| Pd | 7.88430614  | 10.54763888 | 9.10856189  |
| Pd | 5.98030863  | 8.36717712  | 9.82056885  |
| Pd | 9.68119627  | 9.07475128  | 11.13820335 |
| Pd | 9.67970592  | 12.13712712 | 7.79888683  |
| Pd | 7.80244486  | 7.23973502  | 11.50012994 |
| Pd | 8.44702838  | 5.36721052  | 9.62832545  |
| Bi | 10.65408680 | 5.89552728  | 5.14984511  |
| Bi | 10.99384972 | 4.63991688  | 10.03663988 |
| Bi | 9.79774849  | 8.67902526  | 4.24424284  |
| Bi | 5.93171977  | 6.98452054  | 5.37279406  |
| Bi | 13.05147853 | 6.45265592  | 7.78006131  |
| Bi | 11.76958367 | 10.82806789 | 6.60843445  |
| Bi | 8.20532303  | 4.59650105  | 7.02702350  |
| Bi | 7.25387193  | 11.68795226 | 6.67552361  |
| Bi | 12.35017210 | 9.74344757  | 10.85963969 |
| Bi | 5.86847883  | 5.76197944  | 10.49651327 |
| Bi | 5.16462265  | 10.72352995 | 8.84934762  |
| Bi | 10.25928882 | 6.61602223  | 12.18034981 |
| Bi | 7.13363873  | 9.87526273  | 11.68973709 |
| Bi | 9.85739823  | 11.77204466 | 10.49688505 |
| Bi | 4.16709652  | 7.87348082  | 7.76135408  |

**Pd<sub>17</sub>**

|    |             |            |             |
|----|-------------|------------|-------------|
| Pd | 7.73276648  | 6.82541920 | 7.30007735  |
| Pd | 6.48235689  | 9.37672696 | 7.31661518  |
| Pd | 7.76001878  | 8.77805373 | 5.15400544  |
| Pd | 11.03131372 | 5.58499892 | 7.26928929  |
| Pd | 9.10924690  | 9.27799977 | 7.30841183  |
| Pd | 9.74648749  | 7.25317835 | 5.81789389  |
| Pd | 7.76946830  | 8.73326021 | 9.45117617  |
| Pd | 9.76513949  | 7.22225078 | 8.76286709  |
| Pd | 7.69220456  | 6.28479610 | 10.18869077 |
| Pd | 8.92402391  | 4.72210080 | 8.52475141  |
| Pd | 7.69669772  | 6.33401751 | 4.36721246  |
| Pd | 5.68947712  | 7.32447154 | 8.71739169  |
| Pd | 5.71333253  | 7.35407210 | 5.86312159  |
| Pd | 6.43585042  | 4.80891194 | 6.02315247  |
| Pd | 4.35047054  | 5.68445732 | 7.24548063  |
| Pd | 6.40665263  | 4.78403718 | 8.53196394  |
| Pd | 8.93785851  | 4.74948063 | 6.00951422  |

**Pd<sub>17</sub>Bi**

|    |             |             |             |
|----|-------------|-------------|-------------|
| Pd | 7.81073453  | 5.07905570  | 5.47547497  |
| Pd | 9.40572844  | 8.95826358  | 6.30983937  |
| Pd | 8.27327586  | 7.50667269  | 4.43400876  |
| Pd | 10.08119658 | 5.87288038  | 8.58075199  |
| Pd | 7.87115411  | 4.69579138  | 8.07230820  |
| Pd | 7.53355052  | 7.02103005  | 7.19678821  |
| Pd | 9.88599960  | 6.40422971  | 6.11999113  |
| Pd | 5.54943673  | 5.01195718  | 6.82526990  |
| Pd | 11.37344789 | 7.90254525  | 7.53653521  |
| Pd | 5.82318223  | 6.84903737  | 5.01199640  |
| Pd | 9.17243151  | 8.22916702  | 8.82084596  |
| Pd | 8.05523733  | 6.29567088  | 10.18626178 |
| Pd | 7.92065948  | 10.27719892 | 7.99486566  |
| Pd | 5.36853106  | 10.05805985 | 7.82458030  |
| Pd | 6.59988693  | 8.34210311  | 9.31343351  |
| Pd | 6.83696009  | 9.07495161  | 5.95708966  |
| Pd | 4.95936343  | 7.52693022  | 7.37638431  |
| Bi | 5.63375704  | 5.77585365  | 9.34399868  |



**Pd<sub>17</sub>Bi<sub>2</sub>**

|    |             |            |            |
|----|-------------|------------|------------|
| Pd | 8.09446911  | 9.10448856 | 9.68762746 |
| Pd | 9.76538176  | 9.91525747 | 7.77561461 |
| Pd | 8.93549855  | 8.73780762 | 5.50376354 |
| Pd | 7.15770594  | 9.75048506 | 7.31409328 |
| Pd | 4.72742546  | 8.70966756 | 6.85494034 |
| Pd | 9.50841473  | 7.41779121 | 8.37718706 |
| Pd | 6.42488781  | 8.90360065 | 4.92459754 |
| Pd | 7.25065311  | 6.52206266 | 9.47979716 |
| Pd | 11.28671821 | 5.67762775 | 7.63401327 |
| Pd | 9.53926812  | 6.16176790 | 5.81169801 |
| Pd | 8.87046340  | 4.89966460 | 8.08199886 |
| Pd | 7.08988423  | 4.94449914 | 6.13013955 |
| Pd | 6.43943983  | 4.25759021 | 8.49893694 |
| Pd | 7.26876573  | 7.27416029 | 6.95584834 |
| Pd | 5.04026296  | 6.31131844 | 7.92832588 |
| Pd | 5.21019651  | 6.58136090 | 5.36045408 |
| Pd | 7.61592433  | 6.66782231 | 4.25725547 |
| Bi | 5.55664299  | 8.58723646 | 9.30806696 |
| Bi | 11.28630023 | 8.08904085 | 6.47779130 |

**Pd<sub>17</sub>Bi<sub>3</sub>**

|    |             |             |            |
|----|-------------|-------------|------------|
| Pd | 10.83558493 | 7.87539710  | 8.52748104 |
| Pd | 9.20620513  | 9.75899466  | 7.46968734 |
| Pd | 10.92857941 | 5.72571524  | 6.87843393 |
| Pd | 9.52257857  | 6.26697617  | 4.70464519 |
| Pd | 8.67538168  | 7.24241062  | 6.97841289 |
| Pd | 8.36497638  | 8.02236002  | 9.37576686 |
| Pd | 6.88284688  | 10.07560675 | 8.86920963 |
| Pd | 8.54130780  | 8.84269005  | 4.86927664 |
| Pd | 9.42659227  | 5.66502544  | 9.00043025 |
| Pd | 4.42744547  | 6.32326838  | 8.17521650 |
| Pd | 6.92853028  | 5.85718258  | 8.54597532 |
| Pd | 4.45220163  | 6.98362098  | 5.61916107 |
| Pd | 5.86341102  | 8.91545839  | 4.63462611 |
| Pd | 6.99349775  | 6.58975381  | 5.03724636 |
| Pd | 6.15553986  | 8.23652000  | 7.19030123 |
| Pd | 8.32464106  | 4.71361434  | 6.61576732 |
| Pd | 5.80453570  | 7.83775011  | 9.76159718 |
| Bi | 10.97652605 | 8.26843229  | 5.90198405 |
| Bi | 7.04158391  | 10.60721080 | 6.25396688 |
| Bi | 5.66467970  | 4.75947711  | 6.44589606 |

**Pd<sub>17</sub>Bi<sub>4</sub>**

|    |             |            |            |
|----|-------------|------------|------------|
| Pd | 4.99703392  | 5.95548848 | 4.74851673 |
| Pd | 5.00584078  | 8.51768025 | 4.80749526 |
| Pd | 7.29817488  | 9.45198575 | 5.73581678 |
| Pd | 7.33565593  | 7.21569580 | 4.45826251 |
| Pd | 10.78409075 | 7.19609258 | 7.06845609 |
| Pd | 7.25402196  | 4.94625988 | 5.68248871 |
| Pd | 9.64097793  | 5.92853225 | 4.90434037 |
| Pd | 8.25409000  | 7.17287029 | 7.03771585 |
| Pd | 9.65712384  | 8.46754482 | 4.89108566 |
| Pd | 5.67621492  | 7.19422560 | 7.01150160 |
| Pd | 9.57454098  | 8.40972608 | 9.25579214 |
| Pd | 9.57627567  | 5.87368630 | 9.16465373 |
| Pd | 7.25070086  | 9.40733636 | 8.37299766 |
| Pd | 4.93666096  | 8.44791288 | 9.23612795 |
| Pd | 7.21421317  | 4.89184478 | 8.31701304 |
| Pd | 4.92232386  | 5.88073772 | 9.20079143 |
| Pd | 7.25234658  | 7.13313247 | 9.59199507 |
| Bi | 9.60398615  | 9.83020592 | 7.09181698 |
| Bi | 9.54453242  | 4.45383836 | 7.01584488 |
| Bi | 4.91808352  | 4.51866544 | 6.95198895 |
| Bi | 4.97993912  | 9.90059084 | 7.04218562 |

**Pd<sub>17</sub>Bi<sub>5</sub>**

|    |             |            |            |
|----|-------------|------------|------------|
| Pd | 8.24632758  | 9.42205944 | 7.36064035 |
| Pd | 10.07436979 | 9.15567460 | 5.30664661 |
| Pd | 9.81090074  | 7.08427585 | 6.81619751 |
| Pd | 12.35450990 | 8.19326020 | 6.41126832 |
| Pd | 8.63755905  | 7.20194408 | 9.09303964 |
| Pd | 11.37229957 | 6.94125997 | 9.02289720 |
| Pd | 9.80416579  | 4.93656405 | 8.22960023 |
| Pd | 8.50954470  | 7.05803258 | 4.50301229 |
| Pd | 7.52580599  | 4.40419243 | 7.25249055 |
| Pd | 9.47872181  | 4.73550306 | 5.51719572 |
| Pd | 7.17595833  | 7.02760972 | 6.83626334 |
| Pd | 5.72236901  | 9.67628936 | 6.64272215 |
| Pd | 6.38832243  | 8.59366201 | 8.99854218 |
| Pd | 5.64198635  | 7.45129781 | 4.81065672 |
| Pd | 5.06612332  | 5.07258552 | 6.66510170 |
| Pd | 6.27396272  | 5.93734822 | 8.97743450 |
| Pd | 11.11786643 | 6.68822423 | 4.57227525 |
| Bi | 12.00797092 | 5.50072331 | 6.80213926 |
| Bi | 10.72925505 | 9.33299438 | 8.14928280 |
| Bi | 6.85027922  | 4.99350030 | 4.70150566 |
| Bi | 7.46025364  | 9.49329727 | 4.69797419 |
| Bi | 4.50057266  | 7.47890584 | 7.46931784 |

**Pd<sub>17</sub>Bi<sub>6</sub>**

|    |             |             |            |
|----|-------------|-------------|------------|
| Pd | 4.40908342  | 6.44522080  | 6.83643860 |
| Pd | 6.86338417  | 7.15093689  | 6.84270728 |
| Pd | 6.63626545  | 4.60594616  | 6.84091427 |
| Pd | 5.17389220  | 8.68523310  | 5.40813946 |
| Pd | 8.71679484  | 5.79255737  | 5.43357001 |
| Pd | 9.20133343  | 8.03851950  | 6.84196818 |
| Pd | 7.78694739  | 8.26297688  | 4.45237227 |
| Pd | 9.44139392  | 10.31523895 | 5.42188126 |
| Pd | 11.05059091 | 6.27206418  | 6.85183654 |
| Pd | 8.71457047  | 5.79153267  | 8.25518418 |
| Pd | 7.79153612  | 8.25970447  | 9.23308335 |
| Pd | 5.17908758  | 8.67349871  | 8.28721190 |
| Pd | 11.51133034 | 9.13371815  | 6.83486459 |
| Pd | 9.44392938  | 10.31827997 | 8.25243309 |
| Pd | 5.14614206  | 11.04353135 | 6.86401802 |
| Pd | 7.25927475  | 9.61378690  | 6.84614273 |
| Pd | 7.85215400  | 12.09914710 | 6.83550788 |
| Bi | 6.79654429  | 10.82199930 | 4.55558636 |
| Bi | 10.49213491 | 7.81852449  | 4.55837852 |
| Bi | 6.04890824  | 6.14351477  | 4.55053584 |
| Bi | 6.05891011  | 6.12703705  | 9.13238767 |
| Bi | 10.49661475 | 7.82858962  | 9.12553045 |
| Bi | 6.81180375  | 10.82247859 | 9.14042197 |

**Pd<sub>17</sub>Bi<sub>7</sub>**

|    |             |             |            |
|----|-------------|-------------|------------|
| Pd | 8.78300478  | 8.25002627  | 4.46928002 |
| Pd | 5.64803621  | 10.52703490 | 6.90059804 |
| Pd | 6.08573405  | 8.27828754  | 5.08309633 |
| Pd | 10.02970806 | 5.97700298  | 5.50599462 |
| Pd | 7.96060183  | 7.02989664  | 6.87655458 |
| Pd | 8.06213285  | 4.47356608  | 6.83593226 |
| Pd | 6.13381152  | 8.23864899  | 8.70000873 |
| Pd | 5.62598576  | 6.05130251  | 6.87439630 |
| Pd | 10.00035298 | 10.55223688 | 5.48136003 |
| Pd | 7.95073716  | 9.48945425  | 6.87577100 |
| Pd | 8.07556451  | 12.04682663 | 6.85702012 |
| Pd | 10.00352743 | 10.56442445 | 8.23595199 |
| Pd | 10.17250686 | 8.27236739  | 6.86979106 |
| Pd | 8.82152479  | 8.24956324  | 9.27959507 |
| Pd | 10.04174023 | 5.96633679  | 8.22419832 |
| Pd | 12.31228714 | 6.83291110  | 6.89272102 |
| Pd | 12.27151430 | 9.77347261  | 6.85189250 |
| Bi | 7.37938838  | 10.61385274 | 4.52723728 |
| Bi | 4.20409071  | 8.30309264  | 6.91793298 |
| Bi | 7.35547765  | 5.91525483  | 4.53828985 |
| Bi | 7.43686972  | 5.87091985  | 9.20706601 |
| Bi | 11.51705470 | 8.25191145  | 4.61380200 |
| Bi | 11.53688644 | 8.30600310  | 9.11876917 |
| Bi | 7.39430486  | 10.60639468 | 9.22647674 |

**Pd<sub>17</sub>Bi<sub>8</sub>**

|    |             |             |            |
|----|-------------|-------------|------------|
| Pd | 9.83050068  | 8.97937016  | 4.90855178 |
| Pd | 7.95340675  | 7.15263145  | 4.46509647 |
| Pd | 8.80105127  | 5.41723597  | 6.41549302 |
| Pd | 5.49453011  | 8.01097174  | 5.15856087 |
| Pd | 7.48357608  | 9.65573111  | 5.63280449 |
| Pd | 5.43755467  | 9.46895913  | 7.45232554 |
| Pd | 6.91720025  | 5.30161522  | 8.45541626 |
| Pd | 7.33193049  | 7.61283598  | 7.12588595 |
| Pd | 4.60425572  | 6.87376200  | 7.42629163 |
| Pd | 12.00805557 | 9.39318810  | 8.10804293 |
| Pd | 11.52738170 | 5.45188448  | 6.94655885 |
| Pd | 12.33041521 | 8.02281980  | 5.63021118 |
| Pd | 8.56745374  | 7.22386125  | 9.40079152 |
| Pd | 9.97696346  | 7.71362308  | 7.21580163 |
| Pd | 11.27259306 | 6.93454224  | 9.50217537 |
| Pd | 7.55367656  | 9.79243953  | 9.24592793 |
| Pd | 9.45659605  | 10.30426327 | 7.30916064 |
| Bi | 10.57171203 | 6.33536654  | 4.56476586 |
| Bi | 6.19516349  | 5.50307942  | 5.80880351 |
| Bi | 5.89496785  | 7.73521358  | 9.52846861 |
| Bi | 7.10526695  | 11.58181127 | 7.36228019 |
| Bi | 9.69008744  | 4.82434571  | 8.84308668 |
| Bi | 10.09399218 | 9.38182716  | 9.91853063 |
| Bi | 13.33471122 | 7.13459222  | 7.86806129 |
| Bi | 11.67625015 | 10.61411996 | 5.79760908 |

**Pd<sub>17</sub>Bi<sub>9</sub>**

|    |             |             |             |
|----|-------------|-------------|-------------|
| Pd | 6.00173939  | 9.81699124  | 6.14409298  |
| Pd | 5.64015903  | 6.99943133  | 9.05800767  |
| Pd | 5.99977870  | 9.85988436  | 9.06274508  |
| Pd | 8.20215108  | 6.17520210  | 9.17731104  |
| Pd | 8.18505240  | 6.17249929  | 6.11528774  |
| Pd | 7.87844215  | 8.38256657  | 7.64687062  |
| Pd | 5.62023414  | 6.95701800  | 6.20347048  |
| Pd | 9.35143611  | 4.32835096  | 7.64073180  |
| Pd | 9.91616916  | 7.78514951  | 4.81114594  |
| Pd | 8.75563222  | 10.16138366 | 5.49435270  |
| Pd | 10.15581551 | 6.95122855  | 7.62581888  |
| Pd | 8.77836568  | 10.21763090 | 9.70442720  |
| Pd | 12.31356884 | 7.55409921  | 8.93404307  |
| Pd | 9.93945021  | 7.83931767  | 10.40341515 |
| Pd | 10.24182112 | 9.54741389  | 7.60405119  |
| Pd | 12.30023258 | 7.53321240  | 6.28578858  |
| Pd | 12.87409788 | 9.84958489  | 7.58795011  |
| Bi | 7.28850268  | 8.24568282  | 10.75116497 |
| Bi | 6.45036753  | 4.83336069  | 7.65703090  |
| Bi | 7.26274869  | 8.17315474  | 4.47424188  |
| Bi | 4.17060954  | 8.63359209  | 7.61447043  |
| Bi | 11.50380193 | 9.85716555  | 5.26942503  |
| Bi | 10.82859875 | 5.37401873  | 5.56867358  |
| Bi | 7.59687933  | 11.35933640 | 7.58304515  |
| Bi | 11.53038613 | 9.90116219  | 9.91825015  |
| Bi | 10.84488488 | 5.40007126  | 9.69070244  |

**Pd<sub>17</sub>Bi<sub>10</sub>**

|    |             |             |             |
|----|-------------|-------------|-------------|
| Pd | 9.01717107  | 6.44106531  | 9.20550748  |
| Pd | 10.00012393 | 4.38335774  | 7.73963348  |
| Pd | 11.41053167 | 7.89839849  | 9.75710251  |
| Pd | 12.06658237 | 6.03841788  | 7.95801700  |
| Pd | 6.22200473  | 6.44882673  | 9.41156701  |
| Pd | 6.18199356  | 9.34349009  | 9.49528352  |
| Pd | 9.01065291  | 9.36100061  | 9.35164800  |
| Pd | 5.84676877  | 6.32109455  | 6.44850650  |
| Pd | 8.58316122  | 9.83690829  | 5.90942101  |
| Pd | 7.59639688  | 7.98331665  | 7.63052678  |
| Pd | 5.79215619  | 9.47510298  | 6.41356019  |
| Pd | 10.06103372 | 11.23565221 | 7.75390581  |
| Pd | 10.03954590 | 7.87318965  | 4.61003680  |
| Pd | 8.64375798  | 6.07624692  | 6.10728516  |
| Pd | 10.23947288 | 8.05133952  | 7.27395071  |
| Pd | 12.70773706 | 7.83359378  | 5.98699873  |
| Pd | 12.36662015 | 9.78871491  | 7.99699914  |
| Bi | 7.33793537  | 4.60233395  | 7.89785058  |
| Bi | 11.18086789 | 10.58580664 | 10.18513296 |
| Bi | 11.08528666 | 5.18851062  | 10.21073963 |
| Bi | 13.91381713 | 7.76916766  | 8.48038701  |
| Bi | 7.75555777  | 7.84465222  | 11.09353600 |
| Bi | 7.35557491  | 11.11123283 | 7.90346364  |
| Bi | 7.18737330  | 7.88711919  | 4.69285646  |
| Bi | 4.48077289  | 7.89486484  | 8.09526631  |
| Bi | 11.22104478 | 5.60399910  | 5.52781040  |
| Bi | 11.26982049 | 10.08839730 | 5.61308867  |

**Pd<sub>17</sub>Bi<sub>11</sub>**

|    |             |             |             |
|----|-------------|-------------|-------------|
| Pd | 9.23526817  | 9.53212942  | 6.50163907  |
| Pd | 6.70925407  | 8.81915567  | 5.69308236  |
| Pd | 9.11749998  | 5.25126778  | 8.80979732  |
| Pd | 10.44348255 | 7.37636186  | 7.62639352  |
| Pd | 12.28049687 | 8.34114722  | 9.45343228  |
| Pd | 12.08032339 | 9.35830232  | 6.73850563  |
| Pd | 11.90996145 | 6.60743712  | 5.53084102  |
| Pd | 11.96781818 | 5.41865506  | 8.45866278  |
| Pd | 9.00265167  | 6.96455031  | 5.42098965  |
| Pd | 9.02444257  | 11.50878633 | 8.41285203  |
| Pd | 7.84989684  | 7.50160923  | 7.83698896  |
| Pd | 7.52809806  | 4.98474575  | 6.57065979  |
| Pd | 5.33489534  | 6.71297959  | 6.88318719  |
| Pd | 9.58197599  | 9.04893377  | 9.43489781  |
| Pd | 5.58324672  | 8.02543520  | 9.45451358  |
| Pd | 7.98599534  | 7.10715790  | 10.56722139 |
| Pd | 6.90149703  | 9.97923956  | 8.12294064  |
| Bi | 10.71881571 | 11.79376063 | 6.26280789  |
| Bi | 10.72826023 | 8.73914767  | 4.44521151  |
| Bi | 13.59227660 | 7.26598551  | 7.44552634  |
| Bi | 10.25277162 | 4.69586901  | 6.44198458  |
| Bi | 10.63246318 | 6.59581010  | 10.54551916 |
| Bi | 11.57379762 | 10.85503971 | 9.03697783  |
| Bi | 7.46324805  | 11.48087507 | 5.99874119  |
| Bi | 6.55154491  | 6.44029074  | 4.53064978  |
| Bi | 6.40535303  | 5.50563284  | 9.02413924  |
| Bi | 4.53634628  | 9.20164274  | 7.25803427  |
| Bi | 7.34297454  | 9.71981579  | 10.70871996 |

**Pd<sub>17</sub>Bi<sub>12</sub>**

|    |             |             |             |
|----|-------------|-------------|-------------|
| Pd | 9.30242871  | 7.63868836  | 9.84977548  |
| Pd | 7.23824924  | 4.74186877  | 8.20030337  |
| Pd | 7.67253634  | 9.56116767  | 8.75776051  |
| Pd | 6.45843066  | 7.17359507  | 9.50798937  |
| Pd | 8.20262601  | 7.16762746  | 7.45308273  |
| Pd | 6.80476495  | 6.05654461  | 5.53457435  |
| Pd | 6.88661637  | 10.94006557 | 6.27792728  |
| Pd | 5.93380013  | 8.48393985  | 6.91324517  |
| Pd | 10.13462649 | 10.72625655 | 8.49974416  |
| Pd | 11.61432113 | 10.32163282 | 6.23435412  |
| Pd | 11.65089381 | 8.89939124  | 9.93323827  |
| Pd | 9.95030022  | 5.36818669  | 8.63147662  |
| Pd | 10.67260158 | 7.95581471  | 7.58157674  |
| Pd | 9.04372611  | 9.41845751  | 6.25662416  |
| Pd | 13.29454106 | 8.33002182  | 7.48615781  |
| Pd | 11.58349305 | 5.71358066  | 6.47858791  |
| Pd | 9.50149109  | 7.01384168  | 5.09666330  |
| Bi | 8.16096884  | 5.42295314  | 10.61730161 |
| Bi | 5.16229515  | 9.49968973  | 9.66581355  |
| Bi | 9.23278007  | 10.00812671 | 10.93787669 |
| Bi | 5.04037435  | 6.08342365  | 7.55703519  |
| Bi | 7.24922104  | 8.53933447  | 4.54694159  |
| Bi | 12.84045120 | 10.73969607 | 8.51351137  |
| Bi | 12.01608532 | 7.98165231  | 5.11227229  |
| Bi | 12.37795853 | 6.38142389  | 9.08186564  |
| Bi | 9.05460871  | 4.62175617  | 6.20427191  |
| Bi | 7.65746126  | 12.19094916 | 8.50999667  |
| Bi | 9.52389854  | 12.01458235 | 6.03771468  |
| Bi | 4.42324172  | 10.70190672 | 7.06931966  |

**Pd<sub>17</sub>Bi<sub>13</sub>**

|    |             |             |             |
|----|-------------|-------------|-------------|
| Pd | 7.65491636  | 5.60959674  | 7.92031113  |
| Pd | 7.58843082  | 7.04296815  | 10.23565987 |
| Pd | 9.31354848  | 7.70045181  | 8.21652589  |
| Pd | 7.28796700  | 7.91984367  | 6.38065896  |
| Pd | 7.31799983  | 9.57692727  | 9.03348999  |
| Pd | 6.35115610  | 10.44359263 | 6.56982816  |
| Pd | 4.49155979  | 9.86407746  | 8.47762844  |
| Pd | 5.56559346  | 5.83830432  | 6.18682185  |
| Pd | 5.54323399  | 7.31263450  | 8.47228011  |
| Pd | 9.92577443  | 7.76496989  | 5.51617707  |
| Pd | 11.97059861 | 6.55784212  | 8.80392355  |
| Pd | 10.20660597 | 5.36429976  | 6.90381347  |
| Pd | 10.11696483 | 9.86098910  | 9.60832385  |
| Pd | 11.72981085 | 8.96647785  | 7.52569041  |
| Pd | 10.25318819 | 7.50011328  | 10.85899256 |
| Pd | 9.17264996  | 10.16307482 | 6.88031566  |
| Pd | 8.67904776  | 11.98009509 | 8.88367368  |
| Bi | 5.31017041  | 4.74034931  | 8.60956426  |
| Bi | 8.16501714  | 5.64817596  | 5.22247824  |
| Bi | 8.38109091  | 9.30732842  | 11.56631606 |
| Bi | 6.00778582  | 12.03028519 | 8.77463437  |
| Bi | 4.59798747  | 8.40900314  | 6.20411686  |
| Bi | 5.36894871  | 8.66208008  | 10.71692974 |
| Bi | 8.01165151  | 9.63724315  | 4.46380768  |
| Bi | 12.32728294 | 6.76025642  | 6.15729531  |
| Bi | 9.75802761  | 5.25478947  | 9.55423933  |
| Bi | 12.47873446 | 8.81160408  | 10.14005466 |
| Bi | 11.27604916 | 11.69608388 | 7.96738585  |
| Bi | 11.22060785 | 10.16601129 | 5.13468981  |
| Bi | 8.01246458  | 12.55496927 | 6.36599064  |

**Pd<sub>17</sub>Bi<sub>14</sub>**

|    |             |             |             |
|----|-------------|-------------|-------------|
| Pd | 9.76386239  | 8.24536849  | 6.32190780  |
| Pd | 6.23640692  | 10.08223104 | 6.44418124  |
| Pd | 7.05548266  | 6.54823231  | 9.17083268  |
| Pd | 11.24377553 | 8.73956668  | 8.53312600  |
| Pd | 9.33941055  | 5.93454045  | 7.82797994  |
| Pd | 6.99435663  | 7.37928576  | 6.61246328  |
| Pd | 11.40599963 | 6.12212206  | 9.51470000  |
| Pd | 8.86845262  | 10.79253372 | 6.23955410  |
| Pd | 4.80123569  | 6.16323304  | 7.84179962  |
| Pd | 8.16976674  | 9.16452175  | 8.31876694  |
| Pd | 5.18997894  | 8.75404047  | 8.53351939  |
| Pd | 9.26168804  | 7.46524509  | 10.32595663 |
| Pd | 6.91820229  | 9.04686280  | 10.79916115 |
| Pd | 6.22193400  | 11.14946880 | 8.94292759  |
| Pd | 9.61402031  | 10.03857186 | 10.46271679 |
| Pd | 7.21019261  | 6.49404056  | 11.83302077 |
| Pd | 8.86711314  | 11.88737699 | 8.71066108  |
| Bi | 8.79500991  | 5.90352034  | 5.16758773  |
| Bi | 11.44174088 | 10.36241429 | 6.27273503  |
| Bi | 6.95456427  | 4.57385181  | 7.27813430  |
| Bi | 4.48765033  | 8.10268619  | 6.03299426  |
| Bi | 11.83126823 | 6.62865355  | 6.92214056  |
| Bi | 8.93622705  | 4.83395523  | 10.26448639 |
| Bi | 7.80702900  | 8.99842998  | 4.54705303  |
| Bi | 4.82657146  | 7.06242540  | 10.60293187 |
| Bi | 11.73291445 | 8.27703414  | 11.10032085 |
| Bi | 7.01343605  | 12.62117408 | 6.89041343  |
| Bi | 4.45347725  | 10.18492356 | 10.69783959 |
| Bi | 11.43313227 | 11.45885443 | 9.07577103  |
| Bi | 7.58995155  | 11.71729303 | 11.11735601 |
| Bi | 8.72953874  | 8.58171410  | 12.70230982 |

**Pd<sub>17</sub>Bi<sub>15</sub>**

|    |             |             |             |
|----|-------------|-------------|-------------|
| Pd | 10.03171192 | 7.47450443  | 5.85542119  |
| Pd | 6.13332182  | 8.51839840  | 6.48835155  |
| Pd | 8.91602004  | 6.93301713  | 9.86006544  |
| Pd | 11.73409040 | 9.20138632  | 7.12072188  |
| Pd | 10.78165870 | 6.00809172  | 8.11417844  |
| Pd | 7.83125639  | 6.41216427  | 7.33503138  |
| Pd | 12.99677199 | 7.41610573  | 8.77863508  |
| Pd | 8.28693704  | 9.39786651  | 5.20076503  |
| Pd | 6.59396604  | 5.58912887  | 9.81430787  |
| Pd | 8.94171591  | 8.91368379  | 7.87140635  |
| Pd | 6.35236391  | 8.18000731  | 9.24550070  |
| Pd | 10.98346270 | 8.73419667  | 9.90373115  |
| Pd | 8.38946967  | 9.87644185  | 10.39584743 |
| Pd | 6.71843155  | 10.67662038 | 8.06486305  |
| Pd | 10.51149365 | 11.10852463 | 8.92997439  |
| Pd | 9.68254192  | 8.16128758  | 12.14514401 |
| Pd | 8.98585046  | 11.45303597 | 6.76732780  |
| Bi | 9.58758903  | 4.77949646  | 5.95466142  |
| Bi | 10.75886571 | 9.88596413  | 4.64151128  |
| Bi | 8.77850949  | 4.32767579  | 8.91131228  |
| Bi | 5.15879598  | 6.28044236  | 7.65628975  |
| Bi | 12.58167792 | 6.76799292  | 6.22800446  |
| Bi | 11.38311058 | 6.25423475  | 10.74487659 |
| Bi | 7.48007945  | 6.93836807  | 4.69522455  |
| Bi | 7.07641771  | 7.73912785  | 11.74278043 |
| Bi | 13.17490496 | 10.11362676 | 9.17154407  |
| Bi | 6.45462775  | 11.20887604 | 5.52892492  |
| Bi | 5.72209826  | 10.53188869 | 10.61837617 |
| Bi | 11.64829414 | 11.95026266 | 6.67981521  |
| Bi | 8.23592159  | 12.45166068 | 9.30234353  |
| Bi | 10.57714894 | 10.71101681 | 11.64894282 |
| Bi | 4.21521627  | 9.53512740  | 8.12664730  |

**Pd<sub>18</sub>**

|    |             |            |             |
|----|-------------|------------|-------------|
| Pd | 7.79421487  | 7.43215321 | 7.31383298  |
| Pd | 8.60836146  | 5.69385919 | 8.99442394  |
| Pd | 9.78612711  | 9.46142939 | 7.28244908  |
| Pd | 7.17472422  | 7.50292375 | 4.39192358  |
| Pd | 5.37624299  | 8.30161565 | 8.52579369  |
| Pd | 7.19210285  | 7.48993385 | 10.18449026 |
| Pd | 6.01389315  | 5.81744955 | 8.58210395  |
| Pd | 7.54165059  | 9.61875618 | 8.64787457  |
| Pd | 7.49188800  | 9.56831641 | 5.99527197  |
| Pd | 9.56547213  | 8.06801268 | 9.43658268  |
| Pd | 6.02055369  | 5.83085523 | 6.02936715  |
| Pd | 10.00097901 | 4.49002893 | 7.25779967  |
| Pd | 9.55657611  | 8.10260937 | 5.10930730  |
| Pd | 5.29948611  | 8.28180105 | 6.00140881  |
| Pd | 10.43844576 | 6.99944360 | 7.26482570  |
| Pd | 7.44492742  | 4.06993643 | 7.28998530  |
| Pd | 3.90412779  | 6.57682768 | 7.31052404  |
| Pd | 8.59429013  | 5.73269983 | 5.57344789  |

**Pd<sub>18</sub>Bi**

|    |             |            |            |
|----|-------------|------------|------------|
| Pd | 8.36922666  | 4.30618419 | 8.55605538 |
| Pd | 9.70971186  | 6.29395738 | 4.85071609 |
| Pd | 10.46266375 | 7.87403227 | 6.89273353 |
| Pd | 6.86845772  | 6.38698844 | 9.18493191 |
| Pd | 5.63094527  | 6.45300772 | 6.26310571 |
| Pd | 5.89056905  | 4.44731217 | 7.86174403 |
| Pd | 7.75994307  | 4.82288412 | 6.03254510 |
| Pd | 8.89325653  | 8.79313072 | 5.01019272 |
| Pd | 8.23078516  | 9.60906870 | 7.44032581 |
| Pd | 6.40816121  | 8.98276877 | 5.57740533 |
| Pd | 5.89446234  | 8.64653200 | 8.18023495 |
| Pd | 7.80131304  | 8.67972685 | 9.82097463 |
| Pd | 7.98858919  | 7.15039877 | 6.96300843 |
| Pd | 9.46774581  | 6.69135530 | 9.13436404 |
| Pd | 4.07939503  | 8.41824261 | 6.49155691 |
| Pd | 7.23690951  | 6.83083066 | 4.32911569 |
| Pd | 4.37966838  | 6.59246884 | 8.46649246 |
| Pd | 10.19652562 | 9.18557079 | 9.10117707 |
| Bi | 10.34661630 | 5.17936547 | 7.09896377 |

**Pd<sub>18</sub>Bi<sub>2</sub>**

|    |             |            |            |
|----|-------------|------------|------------|
| Pd | 9.48438510  | 8.27350004 | 9.19963634 |
| Pd | 9.24302046  | 6.98182884 | 6.81602817 |
| Pd | 7.08037146  | 8.87807436 | 8.47072283 |
| Pd | 9.41245174  | 5.76143799 | 4.45277103 |
| Pd | 8.89593557  | 4.53648835 | 6.82272546 |
| Pd | 8.03558818  | 6.09586181 | 9.03650070 |
| Pd | 9.09588403  | 9.52792704 | 6.83037756 |
| Pd | 10.59701215 | 5.85877660 | 8.66476695 |
| Pd | 10.60858432 | 8.12619766 | 4.89289627 |
| Pd | 11.43905564 | 5.76976763 | 6.13216792 |
| Pd | 5.50872043  | 6.66919998 | 8.99167932 |
| Pd | 6.58312087  | 9.62195911 | 5.92130555 |
| Pd | 6.91773602  | 5.17626666 | 5.15068059 |
| Pd | 5.45252650  | 7.54517708 | 4.66432904 |
| Pd | 6.82440537  | 7.06260666 | 6.84122144 |
| Pd | 4.61662171  | 8.43304361 | 7.18139200 |
| Pd | 8.02507386  | 7.89346018 | 4.71813925 |
| Pd | 6.44877473  | 4.47163816 | 7.71334241 |
| Bi | 11.52600718 | 8.23531314 | 7.42830516 |
| Bi | 4.48405468  | 5.78487918 | 6.47206567 |

**Pd<sub>18</sub>Bi<sub>3</sub>**

|    |             |             |            |
|----|-------------|-------------|------------|
| Pd | 7.47524311  | 5.16875110  | 5.61866090 |
| Pd | 7.26900808  | 7.33717040  | 4.35556179 |
| Pd | 10.77243357 | 5.55828113  | 8.60300806 |
| Pd | 11.25403360 | 8.16459968  | 8.70101400 |
| Pd | 9.89210815  | 7.25124701  | 4.62386427 |
| Pd | 9.98662915  | 4.91576981  | 6.07652507 |
| Pd | 9.40499399  | 7.21140755  | 7.05822196 |
| Pd | 8.30070373  | 9.29310289  | 5.65870052 |
| Pd | 11.91953560 | 6.74515344  | 6.46215560 |
| Pd | 5.06473803  | 6.37128554  | 5.42387355 |
| Pd | 8.82861271  | 7.19491573  | 9.50694664 |
| Pd | 4.61908559  | 7.48243813  | 7.92801580 |
| Pd | 6.98751085  | 7.31586058  | 7.17929483 |
| Pd | 6.37487293  | 6.14392261  | 9.64690021 |
| Pd | 8.23142737  | 4.97918981  | 8.10180086 |
| Pd | 9.00659391  | 9.56298355  | 8.27599884 |
| Pd | 5.55346251  | 8.91951154  | 5.68608181 |
| Pd | 6.65349111  | 8.68425933  | 9.38049150 |
| Bi | 10.96999889 | 9.26263742  | 6.23215560 |
| Bi | 5.56937054  | 4.84914753  | 7.52186710 |
| Bi | 6.65783409  | 10.42514318 | 7.46669159 |

**Pd<sub>18</sub>Bi<sub>4</sub>**

|    |             |            |            |
|----|-------------|------------|------------|
| Pd | 8.16800051  | 7.15922318 | 4.47451118 |
| Pd | 8.21804349  | 7.28360482 | 9.63763882 |
| Pd | 10.60219651 | 8.50880436 | 9.19858161 |
| Pd | 5.78384749  | 5.93402364 | 4.91356839 |
| Pd | 10.55875710 | 8.39141305 | 4.82933296 |
| Pd | 5.82728690  | 6.05141495 | 9.28281704 |
| Pd | 10.51923396 | 5.85753442 | 4.93741792 |
| Pd | 5.86681004  | 8.58529358 | 9.17473208 |
| Pd | 11.91412873 | 7.21302272 | 7.03731995 |
| Pd | 4.47191527  | 7.22980528 | 7.07483005 |
| Pd | 5.82815536  | 8.47139743 | 4.90438138 |
| Pd | 10.55788864 | 5.97143057 | 9.20776862 |
| Pd | 8.15461311  | 5.03284894 | 8.42208878 |
| Pd | 8.23143089  | 9.40997906 | 5.69006122 |
| Pd | 9.41979596  | 7.20425592 | 7.04947051 |
| Pd | 6.96624804  | 7.23857208 | 7.06267949 |
| Pd | 8.25679648  | 9.47130330 | 8.31524570 |
| Pd | 8.12924752  | 4.97152470 | 5.79690430 |
| Bi | 5.76459389  | 4.61634667 | 7.13569575 |
| Bi | 10.62145011 | 9.82648133 | 6.97645425 |
| Bi | 10.47595842 | 4.48644788 | 7.11083014 |
| Bi | 5.91008558  | 9.95638012 | 7.00131986 |

**Pd<sub>18</sub>Bi<sub>5</sub>**

|    |             |             |            |
|----|-------------|-------------|------------|
| Pd | 10.70564239 | 6.71460802  | 4.90339117 |
| Pd | 10.65931941 | 5.39590359  | 7.09962896 |
| Pd | 8.35714110  | 7.96027904  | 4.49414940 |
| Pd | 10.46946898 | 8.53615097  | 9.46167837 |
| Pd | 11.89872558 | 7.91312609  | 7.20602175 |
| Pd | 10.42431022 | 10.35273876 | 7.56695156 |
| Pd | 9.40863175  | 7.74632333  | 7.11036176 |
| Pd | 8.16542135  | 5.36339520  | 8.13085492 |
| Pd | 8.35550135  | 5.62818077  | 5.61376985 |
| Pd | 6.04330415  | 6.71711716  | 4.67652059 |
| Pd | 8.19541241  | 10.03208925 | 6.04056392 |
| Pd | 6.97425667  | 7.68933896  | 7.07420691 |
| Pd | 8.13797191  | 9.56903406  | 8.76052183 |
| Pd | 8.03943924  | 7.29986951  | 9.91752004 |
| Pd | 5.73760528  | 8.63220853  | 9.39772760 |
| Pd | 5.90141646  | 5.18657165  | 6.70050134 |
| Pd | 4.46635514  | 7.78476529  | 7.07899782 |
| Pd | 5.92827559  | 10.37765660 | 7.50043988 |
| Bi | 10.32271122 | 5.96937684  | 9.59759354 |
| Bi | 10.68872015 | 9.31051345  | 5.12876548 |
| Bi | 5.73649025  | 6.06469271  | 9.13155140 |
| Bi | 5.77049870  | 9.24877907  | 5.10062426 |
| Bi | 8.18478682  | 11.98611178 | 7.75960955 |

**Pd<sub>18</sub>Bi<sub>6</sub>**

|    |             |             |            |
|----|-------------|-------------|------------|
| Pd | 4.13132484  | 9.60697173  | 6.65830963 |
| Pd | 8.31310107  | 9.55104985  | 7.58004687 |
| Pd | 8.04062318  | 12.09234081 | 7.58606785 |
| Pd | 10.49101238 | 10.75221939 | 8.19280971 |
| Pd | 7.11591429  | 8.25770939  | 9.73322822 |
| Pd | 5.96192050  | 10.51450585 | 8.51294709 |
| Pd | 9.88343535  | 8.35883907  | 9.46975544 |
| Pd | 6.13484782  | 5.92874605  | 8.52992596 |
| Pd | 8.40851728  | 7.05001536  | 7.58318188 |
| Pd | 10.67394915 | 6.01209068  | 8.17231494 |
| Pd | 8.29564669  | 4.49587412  | 7.60911165 |
| Pd | 6.78224507  | 5.93212421  | 5.78072624 |
| Pd | 4.26694985  | 6.67295251  | 6.63727283 |
| Pd | 6.23993155  | 8.22444109  | 7.11300345 |
| Pd | 8.06267818  | 8.29212031  | 5.06200295 |
| Pd | 6.58779120  | 10.56184984 | 5.78753830 |
| Pd | 10.65251586 | 8.39225641  | 6.86879487 |
| Pd | 10.58975472 | 8.35178467  | 4.30772512 |
| Bi | 4.45580837  | 8.15588421  | 9.05054291 |
| Bi | 8.35492629  | 10.68934246 | 9.97953170 |
| Bi | 8.55754004  | 5.93472407  | 9.98886348 |
| Bi | 9.64294420  | 6.03259150  | 5.49819434 |
| Bi | 9.46002297  | 10.63568925 | 5.48027790 |
| Bi | 5.40819869  | 8.21948976  | 4.61284668 |

**Pd<sub>18</sub>Bi<sub>7</sub>**

|    |             |             |             |
|----|-------------|-------------|-------------|
| Pd | 4.16386221  | 8.32594764  | 7.68390856  |
| Pd | 6.84858441  | 8.44328367  | 7.46264523  |
| Pd | 5.92892486  | 10.84915998 | 7.88881518  |
| Pd | 7.90900149  | 7.18150390  | 9.75294304  |
| Pd | 7.98174387  | 9.89909692  | 9.42358513  |
| Pd | 10.58487483 | 10.62609422 | 8.77185375  |
| Pd | 10.21106915 | 6.21677591  | 8.83834020  |
| Pd | 5.44304477  | 6.82658598  | 5.86558247  |
| Pd | 5.82608624  | 6.17264883  | 8.37377078  |
| Pd | 7.52740679  | 7.96883080  | 4.79520284  |
| Pd | 7.89268324  | 10.34587323 | 5.93953093  |
| Pd | 10.25347977 | 11.39997963 | 6.10484415  |
| Pd | 9.95633622  | 8.88156192  | 5.02958437  |
| Pd | 12.03896548 | 8.14722389  | 8.86199475  |
| Pd | 9.91925846  | 4.53245748  | 6.76611198  |
| Pd | 11.23809269 | 6.89834001  | 6.53065592  |
| Pd | 8.03310430  | 6.30013624  | 6.82780782  |
| Pd | 9.46051377  | 8.53312501  | 7.66128377  |
| Bi | 5.62281468  | 8.59694311  | 9.86590285  |
| Bi | 8.41108207  | 12.08071707 | 7.91454416  |
| Bi | 10.05281577 | 8.54502890  | 10.54790012 |
| Bi | 8.07586821  | 4.61237891  | 8.86597946  |
| Bi | 5.32217196  | 9.54732030  | 5.53462769  |
| Bi | 9.56974510  | 6.20326830  | 4.60817519  |
| Bi | 12.01522831 | 9.53055565  | 6.63448224  |

**Pd<sub>18</sub>Bi<sub>8</sub>**

|    |             |             |             |
|----|-------------|-------------|-------------|
| Pd | 11.36350076 | 10.62671559 | 6.54559975  |
| Pd | 11.91148418 | 6.99183420  | 8.85120182  |
| Pd | 11.21133156 | 9.80040051  | 9.73112557  |
| Pd | 9.31062845  | 6.22012503  | 8.43895730  |
| Pd | 9.57876348  | 6.65650025  | 5.66270574  |
| Pd | 10.05263196 | 8.56690932  | 7.59761660  |
| Pd | 12.10545198 | 7.69793491  | 6.02231911  |
| Pd | 8.96062186  | 4.22202099  | 6.74619824  |
| Pd | 7.68834443  | 8.28785770  | 4.75009401  |
| Pd | 8.63787674  | 10.36621858 | 6.24416404  |
| Pd | 8.51682118  | 9.39089693  | 9.60311654  |
| Pd | 4.52894232  | 9.36203963  | 7.69561996  |
| Pd | 5.34661210  | 6.82103410  | 8.31507027  |
| Pd | 6.84599291  | 11.01338398 | 8.23256984  |
| Pd | 7.44325266  | 6.89587104  | 10.21539884 |
| Pd | 7.30567288  | 8.39202395  | 7.48347383  |
| Pd | 7.15282389  | 6.07209502  | 6.37109710  |
| Pd | 5.25682704  | 7.69616083  | 5.74858560  |
| Bi | 10.05296314 | 7.51911075  | 10.71391722 |
| Bi | 11.44634844 | 5.23515173  | 6.87899604  |
| Bi | 10.31482315 | 9.04735989  | 4.55320834  |
| Bi | 13.05360728 | 9.17808853  | 7.95815438  |
| Bi | 6.02516820  | 10.23169763 | 5.71121491  |
| Bi | 9.59460790  | 11.58027626 | 8.42033257  |
| Bi | 5.85265748  | 8.98914072  | 9.88944334  |
| Bi | 7.04015244  | 4.72685296  | 8.62673519  |

**Pd<sub>18</sub>Bi<sub>9</sub>**

|    |             |             |             |
|----|-------------|-------------|-------------|
| Pd | 5.50229249  | 6.37986672  | 9.06683872  |
| Pd | 5.65927414  | 9.26903206  | 9.03833422  |
| Pd | 7.58868401  | 7.47145318  | 7.61711356  |
| Pd | 8.14952292  | 5.50998904  | 9.77369565  |
| Pd | 8.32426616  | 9.57094564  | 9.13555712  |
| Pd | 12.14430466 | 7.58868997  | 8.96055590  |
| Pd | 12.47907739 | 9.97963790  | 7.63074151  |
| Pd | 9.72047793  | 7.64046618  | 10.38319264 |
| Pd | 9.83272279  | 11.18906900 | 7.65213512  |
| Pd | 10.09462745 | 8.40950338  | 7.61845351  |
| Pd | 5.50611106  | 6.41175538  | 6.13646283  |
| Pd | 8.31710196  | 9.59750393  | 6.13778756  |
| Pd | 5.65023570  | 9.31524412  | 6.21098262  |
| Pd | 9.71446982  | 7.70912186  | 4.82499670  |
| Pd | 12.26175188 | 5.25955553  | 7.57772191  |
| Pd | 9.64769745  | 5.82510383  | 7.60101887  |
| Pd | 12.13507354 | 7.62060980  | 6.24705483  |
| Pd | 8.14659769  | 5.56863860  | 5.42057643  |
| Bi | 6.87736202  | 11.26254072 | 7.65653565  |
| Bi | 3.92462871  | 7.91019497  | 7.61144920  |
| Bi | 10.94347040 | 5.36147143  | 9.89840287  |
| Bi | 7.04248878  | 7.75522482  | 10.75078200 |
| Bi | 11.00250054 | 9.93738465  | 9.82689797  |
| Bi | 6.85634239  | 4.63354971  | 7.58536575  |
| Bi | 7.03565740  | 7.82624956  | 4.47977546  |
| Bi | 10.98850497 | 9.99307291  | 5.44401042  |
| Bi | 10.92570881 | 5.41312295  | 5.27490196  |

**Pd<sub>18</sub>Bi<sub>10</sub>**

|    |             |             |             |
|----|-------------|-------------|-------------|
| Pd | 9.01387122  | 5.40087006  | 7.32069730  |
| Pd | 6.19621287  | 7.26254245  | 9.47495825  |
| Pd | 6.22321511  | 7.72827571  | 5.61547172  |
| Pd | 5.96547517  | 9.57345204  | 7.78716755  |
| Pd | 8.25502847  | 7.96432472  | 7.61825670  |
| Pd | 6.32008419  | 5.52153885  | 7.30771581  |
| Pd | 8.79223581  | 7.26005190  | 10.48878692 |
| Pd | 8.46725689  | 10.95221866 | 7.95721448  |
| Pd | 13.08463887 | 6.28590777  | 8.88130878  |
| Pd | 13.05582760 | 6.63945856  | 5.98427026  |
| Pd | 10.82920969 | 7.29196787  | 7.57829734  |
| Pd | 10.43906740 | 5.23852295  | 9.52129475  |
| Pd | 10.44236175 | 5.78639831  | 5.14671418  |
| Pd | 8.80175705  | 7.97929878  | 4.60574805  |
| Pd | 12.70451292 | 9.12605970  | 9.12079229  |
| Pd | 10.01112579 | 9.21021577  | 9.20873923  |
| Pd | 10.01771449 | 9.50470050  | 6.36299048  |
| Pd | 12.69729582 | 9.44528085  | 6.38805975  |
| Bi | 7.65338138  | 5.04199993  | 9.59453338  |
| Bi | 7.69104740  | 5.60415754  | 4.99911600  |
| Bi | 7.39070943  | 10.08612145 | 5.60595903  |
| Bi | 4.45447358  | 7.42581199  | 7.52512927  |
| Bi | 7.37381876  | 9.54788545  | 10.03519213 |
| Bi | 11.49539174 | 8.12067605  | 4.44694064  |
| Bi | 14.56863822 | 8.04672817  | 7.60539639  |
| Bi | 11.81105889 | 4.64092879  | 7.22093523  |
| Bi | 11.48882208 | 7.38430278  | 10.68961376 |
| Bi | 11.35047848 | 11.16320841 | 7.97502805  |

**Pd<sub>18</sub>Bi<sub>11</sub>**

|    |             |             |             |
|----|-------------|-------------|-------------|
| Pd | 8.77744613  | 5.74041732  | 8.64494553  |
| Pd | 8.42470064  | 6.01532875  | 5.89272299  |
| Pd | 8.96305106  | 9.77302043  | 6.09698240  |
| Pd | 7.71578160  | 7.96187072  | 7.69124579  |
| Pd | 6.61098519  | 8.45856355  | 10.09273740 |
| Pd | 5.71840198  | 6.25949951  | 8.91278280  |
| Pd | 5.72745278  | 6.90656499  | 6.15542426  |
| Pd | 6.27859040  | 9.81467959  | 6.22833304  |
| Pd | 6.12539787  | 10.70554213 | 8.85537770  |
| Pd | 11.61330367 | 5.89792272  | 8.41597912  |
| Pd | 9.20724133  | 7.86141106  | 10.31361702 |
| Pd | 10.36213457 | 8.19578916  | 7.73405637  |
| Pd | 10.22094931 | 7.75086157  | 4.88702530  |
| Pd | 12.69762241 | 7.36021761  | 6.31003043  |
| Pd | 8.74351016  | 10.10219926 | 8.92326214  |
| Pd | 12.83594188 | 9.61512508  | 8.09218823  |
| Pd | 10.59580488 | 11.35512601 | 7.44414390  |
| Pd | 11.83451325 | 7.98434132  | 10.16315793 |
| Bi | 7.33599253  | 6.05108999  | 11.02632382 |
| Bi | 6.67207357  | 4.61095699  | 7.19895604  |
| Bi | 4.70612690  | 8.58599443  | 7.99222776  |
| Bi | 7.49315726  | 8.10259223  | 4.53254606  |
| Bi | 7.78416141  | 11.89986336 | 7.17882677  |
| Bi | 8.15038334  | 10.03022185 | 11.49282196 |
| Bi | 10.55294507 | 5.56126994  | 10.78239604 |
| Bi | 10.95983213 | 5.40121364  | 5.93264656  |
| Bi | 11.79344909 | 9.77326415  | 5.67329485  |
| Bi | 13.88324121 | 7.25306389  | 8.67994046  |
| Bi | 11.21506838 | 10.56392699 | 9.93524424  |

**Pd<sub>18</sub>Bi<sub>12</sub>**

|    |             |             |             |
|----|-------------|-------------|-------------|
| Pd | 10.64066751 | 8.56648833  | 6.33670434  |
| Pd | 10.08105596 | 5.79911430  | 6.70118074  |
| Pd | 9.76306504  | 7.49057888  | 8.74682518  |
| Pd | 8.43086239  | 9.30891091  | 10.39439389 |
| Pd | 10.88958398 | 9.88389817  | 9.05661296  |
| Pd | 9.94943309  | 12.21947066 | 8.06079968  |
| Pd | 12.93273911 | 8.56859773  | 7.82390406  |
| Pd | 12.29226077 | 5.83413025  | 8.45171567  |
| Pd | 7.46549967  | 11.69495700 | 9.31718722  |
| Pd | 9.74595389  | 11.06868613 | 5.48095070  |
| Pd | 5.67575750  | 6.00995252  | 6.76310709  |
| Pd | 4.39737274  | 8.08617071  | 8.35696990  |
| Pd | 7.80373354  | 5.22257452  | 8.30839592  |
| Pd | 7.16203048  | 10.07289994 | 5.16947827  |
| Pd | 6.99996445  | 7.86632115  | 8.62947707  |
| Pd | 8.56794403  | 9.75141130  | 7.61246532  |
| Pd | 7.94583656  | 7.53870683  | 6.06452473  |
| Pd | 5.82417660  | 10.32719169 | 7.52058969  |
| Bi | 12.01613792 | 10.94797813 | 6.87026933  |
| Bi | 12.01277867 | 7.75248134  | 10.18945976 |
| Bi | 12.49315055 | 6.69444268  | 5.99551662  |
| Bi | 10.21012441 | 4.33647685  | 8.92494535  |
| Bi | 8.35830622  | 6.57275591  | 10.76082011 |
| Bi | 9.73622608  | 11.62494197 | 10.66774339 |
| Bi | 7.81921756  | 4.90569281  | 5.65512443  |
| Bi | 5.19720522  | 8.37500591  | 5.79201756  |
| Bi | 9.23086982  | 8.80832622  | 4.12048943  |
| Bi | 5.77384043  | 9.77906969  | 10.12967041 |
| Bi | 5.39254875  | 5.76843526  | 9.37097112  |
| Bi | 7.63260456  | 12.25171909 | 6.70639066  |

**Pd<sub>18</sub>Bi<sub>13</sub>**

|    |             |             |             |
|----|-------------|-------------|-------------|
| Pd | 8.33162044  | 6.50143973  | 8.64038639  |
| Pd | 10.82943333 | 5.34932614  | 8.57546954  |
| Pd | 12.31932724 | 8.73587109  | 5.96221228  |
| Pd | 11.18319153 | 6.17705758  | 5.94970317  |
| Pd | 12.74858532 | 9.46827866  | 8.63075788  |
| Pd | 10.45706188 | 8.03984267  | 7.85781927  |
| Pd | 10.25396632 | 10.59422094 | 8.81054842  |
| Pd | 11.79558341 | 7.34279854  | 10.24139279 |
| Pd | 9.35251015  | 8.53323805  | 10.33260105 |
| Pd | 9.77156554  | 9.83437242  | 5.88847858  |
| Pd | 5.87326977  | 8.08759771  | 9.01234927  |
| Pd | 7.26040931  | 7.07575290  | 11.09290323 |
| Pd | 6.55335425  | 5.81040519  | 6.73720391  |
| Pd | 8.04475638  | 9.22010820  | 7.88468361  |
| Pd | 6.79190194  | 11.58055463 | 8.20392045  |
| Pd | 9.33922004  | 12.29579680 | 6.93910024  |
| Pd | 5.58285694  | 9.46670432  | 6.70901863  |
| Pd | 8.61424374  | 7.37343896  | 5.93961313  |
| Bi | 9.05443200  | 4.73641620  | 6.64526357  |
| Bi | 11.91471530 | 11.25796689 | 6.75442382  |
| Bi | 10.48387277 | 7.98091488  | 4.13597831  |
| Bi | 12.98780728 | 6.87195180  | 7.87728318  |
| Bi | 9.67358426  | 5.86775864  | 10.94572230 |
| Bi | 11.56487848 | 9.86098387  | 11.00279311 |
| Bi | 7.13792384  | 9.95935485  | 10.59457610 |
| Bi | 5.97048806  | 5.44214460  | 9.38157479  |
| Bi | 8.79281737  | 12.68509939 | 9.47364244  |
| Bi | 4.19381881  | 7.11947898  | 7.11408449  |
| Bi | 7.41263340  | 11.02980580 | 5.62881119  |
| Bi | 6.24769950  | 7.66012155  | 4.78702475  |
| Bi | 4.49140013  | 10.43143737 | 8.93151753  |

**Pd<sub>18</sub>Bi<sub>14</sub>**

|    |             |             |             |
|----|-------------|-------------|-------------|
| Pd | 9.10237103  | 9.86388499  | 5.99295564  |
| Pd | 7.75419713  | 6.07336567  | 6.34557876  |
| Pd | 7.25051332  | 9.19681862  | 9.93558645  |
| Pd | 11.35621861 | 10.35478637 | 7.41780445  |
| Pd | 7.89768234  | 11.21490100 | 8.21428282  |
| Pd | 7.02002963  | 8.59867386  | 7.35908906  |
| Pd | 10.25478946 | 12.25798810 | 9.16408279  |
| Pd | 9.91533529  | 7.37908307  | 5.22715812  |
| Pd | 5.00397788  | 7.95661909  | 9.34947456  |
| Pd | 9.46365487  | 7.93682318  | 7.84892425  |
| Pd | 7.11770277  | 6.27430520  | 8.93496046  |
| Pd | 9.86945205  | 9.72362020  | 9.88783679  |
| Pd | 9.39323770  | 7.02192688  | 10.44644341 |
| Pd | 9.44004608  | 5.16283836  | 8.25892306  |
| Pd | 11.83307344 | 8.12917713  | 9.16676220  |
| Pd | 8.57726674  | 8.99626858  | 12.21278423 |
| Pd | 11.62589609 | 6.42114040  | 7.13198455  |
| Pd | 4.48314345  | 9.21387122  | 6.79021137  |
| Bi | 6.47012456  | 10.92089190 | 5.91444241  |
| Bi | 11.48141458 | 9.42554693  | 4.78293899  |
| Bi | 5.19501870  | 10.63995589 | 8.93193372  |
| Bi | 5.17196143  | 6.61972609  | 7.04692167  |
| Bi | 9.76076623  | 12.38722883 | 6.57468455  |
| Bi | 8.22032392  | 11.53453132 | 10.91843244 |
| Bi | 7.40598974  | 8.11388568  | 4.64541267  |
| Bi | 6.71167431  | 7.08637790  | 11.50350234 |
| Bi | 12.41635462 | 10.80066009 | 9.81114291  |
| Bi | 10.02336285 | 4.75518481  | 5.72422109  |
| Bi | 8.32271169  | 4.52229072  | 10.58208423 |
| Bi | 13.31599712 | 8.43895183  | 6.94235866  |
| Bi | 11.61088040 | 5.49459347  | 9.71665248  |
| Bi | 11.19239817 | 8.42899461  | 11.85314834 |

**Pd<sub>18</sub>Bi<sub>15</sub>**

|    |             |             |             |
|----|-------------|-------------|-------------|
| Pd | 8.56426128  | 8.22948200  | 5.53057221  |
| Pd | 8.39112610  | 11.47521219 | 7.90242440  |
| Pd | 11.53299378 | 8.44431357  | 8.77733104  |
| Pd | 7.78182650  | 6.21170973  | 7.33708277  |
| Pd | 10.97293970 | 7.07843272  | 6.53213973  |
| Pd | 10.71497594 | 10.15660151 | 6.71886069  |
| Pd | 10.02917724 | 4.74621405  | 7.50559402  |
| Pd | 6.62139089  | 9.90607649  | 6.53324946  |
| Pd | 12.73102792 | 10.81697335 | 8.50600136  |
| Pd | 8.72942373  | 8.80573771  | 8.07870378  |
| Pd | 10.25590996 | 10.68474417 | 9.69771993  |
| Pd | 9.50076444  | 6.70574149  | 9.48966183  |
| Pd | 7.99591341  | 8.97049524  | 10.60689378 |
| Pd | 6.27590531  | 10.78537389 | 9.47600875  |
| Pd | 6.97622261  | 6.48007287  | 10.58680089 |
| Pd | 11.53706041 | 7.27109135  | 11.18358495 |
| Pd | 6.12782986  | 8.11240748  | 8.57372870  |
| Pd | 10.05170426 | 9.56011664  | 12.14220917 |
| Bi | 10.95879566 | 8.65862909  | 4.33607932  |
| Bi | 5.95697770  | 7.43954723  | 5.77900104  |
| Bi | 13.09356483 | 8.88065095  | 6.58725646  |
| Bi | 10.79491742 | 12.56323457 | 7.89988546  |
| Bi | 9.21544008  | 5.65325774  | 5.06567822  |
| Bi | 12.01997328 | 5.84627760  | 8.85650880  |
| Bi | 8.65825762  | 11.00048069 | 5.17483558  |
| Bi | 12.42299818 | 9.76521207  | 11.04538958 |
| Bi | 8.15035635  | 4.32276071  | 9.34860806  |
| Bi | 5.87728593  | 12.40274306 | 7.34661638  |
| Bi | 8.23491738  | 11.58722942 | 11.10622312 |
| Bi | 5.39629936  | 5.58119997  | 8.58198444  |
| Bi | 5.39119823  | 8.74933346  | 11.07814351 |
| Bi | 9.11653881  | 7.04566355  | 12.19058343 |
| Bi | 4.21792062  | 9.89035417  | 7.85783331  |

**Pd<sub>19</sub>**

|    |             |             |             |
|----|-------------|-------------|-------------|
| Pd | 7.98091400  | 7.23573100  | 7.23441600  |
| Pd | 6.07148033  | 8.39090098  | 5.72773312  |
| Pd | 9.89034767  | 8.39090098  | 5.72773312  |
| Pd | 6.07148033  | 6.08056102  | 8.74109888  |
| Pd | 9.89034767  | 6.08056102  | 8.74109888  |
| Pd | 9.88958151  | 8.74760805  | 8.38477496  |
| Pd | 7.98091400  | 4.58311202  | 7.58582052  |
| Pd | 6.07224649  | 8.74760805  | 8.38477496  |
| Pd | 7.98091400  | 9.88834998  | 6.88301148  |
| Pd | 6.07224649  | 5.72385395  | 6.08405704  |
| Pd | 7.98091400  | 6.88187481  | 4.59561936  |
| Pd | 9.88958151  | 5.72385395  | 6.08405704  |
| Pd | 7.98091400  | 7.58958719  | 9.87321264  |
| Pd | 7.98091400  | 5.06087286  | 10.07671676 |
| Pd | 7.98091400  | 9.41058914  | 4.39211524  |
| Pd | 7.98091400  | 10.07979296 | 9.40827120  |
| Pd | 7.98091400  | 4.39166904  | 5.06056080  |
| Pd | 4.39012521  | 7.23573100  | 7.23441600  |
| Pd | 11.57170279 | 7.23573100  | 7.23441600  |

**Pd<sub>19</sub>Bi**

|    |             |             |            |
|----|-------------|-------------|------------|
| Pd | 7.85126742  | 4.40805760  | 7.52609621 |
| Pd | 9.43423553  | 5.47516487  | 9.36161752 |
| Pd | 10.25500854 | 5.07996560  | 6.83732763 |
| Pd | 8.36622816  | 7.07997235  | 7.38130210 |
| Pd | 6.92653391  | 5.91829655  | 9.51590398 |
| Pd | 5.95609393  | 6.05315246  | 7.12225571 |
| Pd | 8.19334142  | 5.79607923  | 5.27493350 |
| Pd | 8.28056049  | 8.24827680  | 4.29631859 |
| Pd | 10.43318025 | 7.17507118  | 5.18315026 |
| Pd | 5.99786225  | 7.10832818  | 4.79621532 |
| Pd | 8.53804086  | 8.01886707  | 9.68042840 |
| Pd | 7.80707825  | 10.17112623 | 8.36130788 |
| Pd | 10.84712986 | 7.25819428  | 8.22190519 |
| Pd | 10.33828945 | 9.69212627  | 8.70297495 |
| Pd | 9.36628103  | 9.22972736  | 6.42848286 |
| Pd | 11.94706867 | 8.96191574  | 6.63296977 |
| Pd | 4.45661132  | 8.05230486  | 6.68953669 |
| Pd | 6.80924166  | 8.99231908  | 6.28702971 |
| Pd | 6.12245118  | 8.21391100  | 8.64392740 |
| Bi | 12.55640876 | 6.37017802  | 6.44521634 |

**Pd<sub>19</sub>Bi<sub>2</sub>**

|    |             |            |            |
|----|-------------|------------|------------|
| Pd | 4.53301831  | 7.64126988 | 8.07788228 |
| Pd | 6.84581028  | 6.39445916 | 9.66176599 |
| Pd | 4.98283849  | 8.12750705 | 5.42084189 |
| Pd | 6.83159782  | 7.21746828 | 7.25005715 |
| Pd | 6.55569955  | 8.91739034 | 9.33664800 |
| Pd | 8.47168299  | 9.83883380 | 7.63302065 |
| Pd | 9.00277914  | 7.91325567 | 9.46037314 |
| Pd | 7.66735441  | 8.79769918 | 5.22732672 |
| Pd | 11.02767657 | 8.99073727 | 8.12780746 |
| Pd | 7.85051039  | 5.00735341 | 6.11491703 |
| Pd | 11.07244981 | 6.40088700 | 8.66112950 |
| Pd | 10.37743668 | 4.91819082 | 6.52943393 |
| Pd | 11.67166939 | 7.18920323 | 6.12674777 |
| Pd | 6.73838982  | 6.51053739 | 4.43475210 |
| Pd | 9.23445019  | 7.32260613 | 7.02107819 |
| Pd | 9.38751110  | 6.61718426 | 4.62565084 |
| Pd | 6.38894008  | 4.39254509 | 8.14002213 |
| Pd | 8.78705496  | 5.20262600 | 8.55792331 |
| Pd | 5.08258262  | 5.64376678 | 6.29950225 |
| Bi | 10.24700328 | 9.35660132 | 5.56397684 |
| Bi | 5.86588962  | 9.95254693 | 7.03539737 |

**Pd<sub>19</sub>Bi<sub>3</sub>**

|    |             |             |            |
|----|-------------|-------------|------------|
| Pd | 10.60006897 | 8.76894367  | 5.27864182 |
| Pd | 11.95417402 | 7.30401622  | 7.02734194 |
| Pd | 10.58853133 | 6.23754749  | 4.83747109 |
| Pd | 9.42718524  | 7.34074878  | 7.02404145 |
| Pd | 5.89108812  | 6.08156849  | 4.89269468 |
| Pd | 5.83825788  | 8.61750397  | 4.88530719 |
| Pd | 8.12248032  | 9.64940527  | 5.72866069 |
| Pd | 8.21025171  | 7.41805142  | 4.46639723 |
| Pd | 8.29904064  | 5.16879417  | 5.73710153 |
| Pd | 8.20084763  | 7.54106071  | 9.55080146 |
| Pd | 4.49894005  | 7.35890602  | 7.02239822 |
| Pd | 8.30283181  | 5.22148897  | 8.40700468 |
| Pd | 5.88572139  | 6.13910124  | 9.17767709 |
| Pd | 6.99963679  | 7.38869523  | 7.02534760 |
| Pd | 5.84716960  | 8.67687335  | 9.12897022 |
| Pd | 8.12085553  | 9.77366884  | 8.27016760 |
| Pd | 10.58390315 | 6.39004735  | 9.28118620 |
| Pd | 10.59537514 | 8.88433767  | 8.67279979 |
| Pd | 10.14309318 | 10.66273125 | 6.92537774 |
| Bi | 10.67339779 | 4.82300040  | 7.10868859 |
| Bi | 5.98703268  | 4.68501438  | 7.05350714 |
| Bi | 5.76215543  | 10.11977619 | 6.98966013 |

**Pd<sub>19</sub>Bi<sub>4</sub>**

|    |             |             |            |
|----|-------------|-------------|------------|
| Pd | 8.49354815  | 7.72693394  | 9.65176437 |
| Pd | 12.00927102 | 7.19881956  | 7.11760506 |
| Pd | 8.65324210  | 9.86807682  | 8.23821109 |
| Pd | 10.75131605 | 5.95685587  | 4.98712204 |
| Pd | 8.64706939  | 9.65184113  | 5.59315295 |
| Pd | 10.96354441 | 8.48330126  | 4.94883031 |
| Pd | 8.52761420  | 7.37072191  | 4.46308013 |
| Pd | 10.94676858 | 8.75284197  | 9.10055316 |
| Pd | 9.50394761  | 7.44276546  | 7.08606321 |
| Pd | 10.68882567 | 6.23911898  | 9.38810901 |
| Pd | 6.10870871  | 6.25109123  | 5.09255871 |
| Pd | 8.39183119  | 5.25584896  | 5.89868016 |
| Pd | 8.31923549  | 5.44641482  | 8.52276699 |
| Pd | 6.32380771  | 4.47715744  | 7.22873031 |
| Pd | 6.99343050  | 7.70899056  | 7.03544625 |
| Pd | 6.31410063  | 9.16770004  | 9.20853695 |
| Pd | 6.24069185  | 8.85111047  | 4.76014523 |
| Pd | 4.54941934  | 8.66887117  | 7.25059310 |
| Pd | 5.97161484  | 6.54960240  | 9.07951111 |
| Bi | 10.62475892 | 4.72429895  | 7.28584243 |
| Bi | 10.96626571 | 10.12639543 | 6.92693888 |
| Bi | 6.46071907  | 10.52198987 | 6.83804435 |
| Bi | 4.37326483  | 6.09174625  | 7.03043691 |

**Pd<sub>19</sub>Bi<sub>5</sub>**

|    |             |             |            |
|----|-------------|-------------|------------|
| Pd | 6.74712247  | 8.15702760  | 9.29530998 |
| Pd | 7.34686902  | 5.56396052  | 9.46264717 |
| Pd | 9.08305472  | 9.39443314  | 8.60528386 |
| Pd | 6.57347944  | 6.08330978  | 5.04945324 |
| Pd | 5.41192706  | 6.36398717  | 7.69264455 |
| Pd | 6.43734022  | 8.67943045  | 5.59830624 |
| Pd | 7.86264267  | 7.10910872  | 7.23548567 |
| Pd | 8.77821822  | 9.84678208  | 6.02925874 |
| Pd | 8.71797793  | 7.71532899  | 4.59913511 |
| Pd | 12.74546178 | 7.83458300  | 6.66506671 |
| Pd | 9.14528729  | 5.35238372  | 5.49954571 |
| Pd | 11.62926002 | 8.67989221  | 9.12039861 |
| Pd | 9.60623825  | 5.05404016  | 8.09987308 |
| Pd | 11.90877358 | 6.19478829  | 8.81439893 |
| Pd | 9.46842133  | 7.12175507  | 9.63628912 |
| Pd | 11.24010109 | 6.66188386  | 4.49003588 |
| Pd | 10.27443889 | 7.54167633  | 6.92914748 |
| Pd | 11.03388250 | 9.16626266  | 4.82313054 |
| Pd | 4.55860156  | 8.85624097  | 7.66217858 |
| Bi | 7.18042616  | 4.38308370  | 7.07899494 |
| Bi | 6.74712247  | 10.32181699 | 7.72007803 |
| Bi | 11.22456479 | 10.28080946 | 7.14745875 |
| Bi | 11.76057582 | 5.10858777  | 6.47176292 |
| Bi | 4.23202473  | 7.27573067  | 5.52950392 |

**Pd<sub>19</sub>Bi<sub>6</sub>**

|    |             |             |            |
|----|-------------|-------------|------------|
| Pd | 4.87121955  | 7.35245500  | 9.08448447 |
| Pd | 7.15246141  | 8.49678178  | 9.30948749 |
| Pd | 10.45330369 | 10.94664434 | 7.98476812 |
| Pd | 8.96241756  | 8.78044418  | 7.49432487 |
| Pd | 7.66411240  | 10.91940478 | 8.33084914 |
| Pd | 7.11336905  | 7.14513509  | 6.76290810 |
| Pd | 8.63815532  | 8.50563309  | 4.86990755 |
| Pd | 6.53710010  | 9.84607541  | 5.99426576 |
| Pd | 4.59929819  | 7.85668310  | 6.49965763 |
| Pd | 8.21324783  | 5.83462824  | 4.64986793 |
| Pd | 7.09233220  | 5.91520937  | 9.13535941 |
| Pd | 5.18950238  | 5.42148440  | 7.34289709 |
| Pd | 9.73495227  | 6.24700850  | 6.86749006 |
| Pd | 9.41877983  | 7.05386383  | 9.58294216 |
| Pd | 11.39773423 | 8.45099812  | 8.48572211 |
| Pd | 11.03066133 | 9.14367478  | 5.98306889 |
| Pd | 9.28274378  | 4.48516320  | 8.94937754 |
| Pd | 9.42040449  | 9.63788283  | 9.97823392 |
| Pd | 12.39030164 | 6.90907961  | 6.55466388 |
| Bi | 8.91838423  | 11.05303138 | 5.85102761 |
| Bi | 5.14242071  | 9.89173441  | 8.24452961 |
| Bi | 6.13991234  | 7.75406722  | 4.32818060 |
| Bi | 7.62857084  | 4.42178602  | 6.89481801 |
| Bi | 11.61567330 | 5.79736863  | 8.82987616 |
| Bi | 10.75647884 | 6.92474080  | 4.46953558 |

**Pd<sub>19</sub>Bi<sub>7</sub>**

|    |             |             |             |
|----|-------------|-------------|-------------|
| Pd | 8.60975075  | 7.66777609  | 9.71462955  |
| Pd | 11.13897495 | 7.82924749  | 8.75818722  |
| Pd | 8.53221232  | 11.18962763 | 6.94119355  |
| Pd | 9.19562021  | 7.39658262  | 4.70560214  |
| Pd | 8.39062680  | 4.87660792  | 4.83042972  |
| Pd | 7.42553196  | 9.26699287  | 5.42167141  |
| Pd | 11.73983658 | 5.48156617  | 7.60854262  |
| Pd | 11.35811521 | 10.29472904 | 7.36948943  |
| Pd | 11.46751405 | 7.79561656  | 6.16656249  |
| Pd | 9.19819775  | 8.61672330  | 7.23616881  |
| Pd | 9.13111633  | 5.96423291  | 7.18049064  |
| Pd | 4.90116921  | 5.70427530  | 8.69569453  |
| Pd | 6.86217524  | 7.33873251  | 7.37673433  |
| Pd | 4.61405027  | 8.57516748  | 7.93327221  |
| Pd | 7.10917909  | 9.66565892  | 8.62039055  |
| Pd | 6.53905224  | 4.85435080  | 6.66208535  |
| Pd | 7.46799619  | 5.32259333  | 9.11730500  |
| Pd | 6.66290490  | 6.83207653  | 4.75813847  |
| Pd | 4.87753083  | 8.76721942  | 5.16003706  |
| Bi | 10.10676605 | 5.47057557  | 9.70091444  |
| Bi | 9.68543533  | 10.16086444 | 9.43229342  |
| Bi | 10.08567260 | 9.94221739  | 5.01013207  |
| Bi | 10.94109127 | 5.41171377  | 5.08253809  |
| Bi | 5.99300422  | 7.63088017  | 10.10895327 |
| Bi | 5.66580283  | 10.80722522 | 6.69325997  |
| Bi | 4.37716083  | 6.40844020  | 6.21779330  |



**Pd<sub>19</sub>Bi<sub>8</sub>**

|    |             |             |            |
|----|-------------|-------------|------------|
| Pd | 10.82139858 | 11.32084054 | 6.93633816 |
| Pd | 9.62750537  | 7.43276546  | 4.92774530 |
| Pd | 9.83364881  | 8.90105749  | 7.29184196 |
| Pd | 11.98352424 | 8.64691897  | 5.58536607 |
| Pd | 7.50327904  | 9.02269152  | 4.52240035 |
| Pd | 8.12091432  | 10.77165169 | 6.55104209 |
| Pd | 5.17824996  | 7.86981795  | 5.22236737 |
| Pd | 7.27547905  | 6.34273614  | 5.27902601 |
| Pd | 9.41341140  | 4.75858849  | 5.42471554 |
| Pd | 11.78344740 | 7.15562502  | 7.99160719 |
| Pd | 10.84350451 | 9.13120441  | 9.83867030 |
| Pd | 9.00762321  | 6.48255143  | 7.43253008 |
| Pd | 8.27456697  | 8.35826959  | 9.43220111 |
| Pd | 5.49099965  | 6.20464479  | 7.35116706 |
| Pd | 6.40911314  | 10.25537746 | 8.75568452 |
| Pd | 7.48127681  | 5.68639121  | 9.42940493 |
| Pd | 7.10056737  | 8.28241592  | 7.07146275 |
| Pd | 4.30002740  | 8.63780440  | 7.64110480 |
| Pd | 10.76526092 | 4.65911036  | 7.89309235 |
| Bi | 9.96882512  | 10.14997726 | 4.60710726 |
| Bi | 12.62248767 | 9.66202045  | 7.92834726 |
| Bi | 5.55240886  | 10.36816829 | 6.08285519 |
| Bi | 11.77416602 | 5.94643584  | 5.62811589 |
| Bi | 10.11675685 | 6.45046686  | 9.97321836 |
| Bi | 9.02245268  | 11.02298081 | 9.07202741 |
| Bi | 5.70025417  | 7.65560157  | 9.60885039 |
| Bi | 7.35966826  | 4.31725806  | 7.10113972 |

**Pd<sub>19</sub>Bi<sub>9</sub>**

|    |             |             |             |
|----|-------------|-------------|-------------|
| Pd | 5.47076294  | 9.57951208  | 8.96401414  |
| Pd | 8.17700654  | 10.32100141 | 5.74964167  |
| Pd | 7.59087819  | 8.16239530  | 7.64013647  |
| Pd | 5.56088709  | 9.57028064  | 6.14392925  |
| Pd | 9.42725963  | 11.90907150 | 7.66333703  |
| Pd | 8.07046302  | 10.33944796 | 9.49369917  |
| Pd | 5.60621847  | 6.70451310  | 6.15415942  |
| Pd | 5.51223708  | 6.70374518  | 8.97358970  |
| Pd | 8.12024240  | 6.00998161  | 9.52335447  |
| Pd | 11.97566869 | 8.18973018  | 8.97133662  |
| Pd | 9.53672215  | 8.19579189  | 10.16624114 |
| Pd | 9.86177370  | 6.95039634  | 7.62471511  |
| Pd | 12.20788561 | 5.74107695  | 7.66084038  |
| Pd | 9.85202633  | 9.40600992  | 7.62133550  |
| Pd | 12.04450845 | 8.18206726  | 6.33300461  |
| Pd | 9.66004992  | 8.18270448  | 5.02110781  |
| Pd | 12.20567898 | 10.60789514 | 7.65284806  |
| Pd | 8.22932267  | 6.00378919  | 5.72706528  |
| Pd | 9.50402239  | 4.44177955  | 7.68133115  |
| Bi | 6.64020490  | 11.55223119 | 7.58047574  |
| Bi | 3.84388929  | 8.11360752  | 7.50784462  |
| Bi | 7.05211409  | 8.15667670  | 4.46160002  |
| Bi | 6.74115366  | 4.76236397  | 7.59341568  |
| Bi | 6.89738969  | 8.16922493  | 10.71130187 |
| Bi | 10.78513349 | 10.57168826 | 9.89383257  |
| Bi | 10.82520024 | 5.83675721  | 9.92304639  |
| Bi | 10.94442751 | 5.85569392  | 5.34022196  |
| Bi | 10.90688013 | 10.52435464 | 5.35101539  |

**=Pd<sub>19</sub>Bi<sub>10</sub>**

|    |             |             |             |
|----|-------------|-------------|-------------|
| Pd | 10.39892257 | 10.36966097 | 9.26571311  |
| Pd | 6.02413228  | 10.54907476 | 7.56269988  |
| Pd | 8.53529085  | 9.52815869  | 7.55065379  |
| Pd | 13.06135808 | 9.70081058  | 8.96459087  |
| Pd | 10.39513103 | 10.36354384 | 5.82422765  |
| Pd | 9.09118546  | 12.05855119 | 7.54792153  |
| Pd | 8.93080497  | 8.29621815  | 4.99159779  |
| Pd | 6.49753669  | 8.29998762  | 6.07037259  |
| Pd | 13.05906776 | 9.68920456  | 6.12622543  |
| Pd | 6.48993435  | 8.28018134  | 9.04347922  |
| Pd | 8.52780399  | 7.03293143  | 7.54399673  |
| Pd | 6.02572973  | 6.00748538  | 7.53696229  |
| Pd | 10.33244541 | 6.15401547  | 9.31987526  |
| Pd | 12.99755617 | 6.76814233  | 8.96895343  |
| Pd | 10.32811496 | 6.15416426  | 5.77720561  |
| Pd | 12.99472695 | 6.76427366  | 6.13707899  |
| Pd | 10.94996708 | 8.24814080  | 7.54749886  |
| Pd | 8.98386738  | 4.49252007  | 7.54615537  |
| Pd | 8.93987004  | 8.28995222  | 10.08081727 |
| Bi | 7.65522864  | 10.70449948 | 9.75975405  |
| Bi | 11.94660492 | 11.68423238 | 7.53744535  |
| Bi | 7.65719178  | 10.72212343 | 5.35008240  |
| Bi | 11.57374385 | 8.25434060  | 4.47929146  |
| Bi | 14.67878948 | 8.19766621  | 7.55056321  |
| Bi | 7.61213589  | 5.88922636  | 5.31235909  |
| Bi | 4.38789712  | 8.27641187  | 7.55306904  |
| Bi | 11.57818977 | 8.26601275  | 10.61753279 |
| Bi | 11.80429682 | 4.81603363  | 7.55320490  |
| Bi | 7.61567723  | 5.86781641  | 9.76337694  |

**Pd<sub>19</sub>Bi<sub>11</sub>**

|    |             |             |             |
|----|-------------|-------------|-------------|
| Pd | 6.46973043  | 7.29293731  | 10.80776598 |
| Pd | 6.73955043  | 11.29400771 | 8.35866242  |
| Pd | 4.34871800  | 7.29233600  | 8.60664882  |
| Pd | 7.99319906  | 9.09743593  | 9.49226960  |
| Pd | 5.70809124  | 5.83674245  | 6.63101387  |
| Pd | 5.93941247  | 8.99350339  | 7.38329223  |
| Pd | 8.65177708  | 6.22447981  | 9.63814581  |
| Pd | 6.88744036  | 8.11903325  | 5.06323784  |
| Pd | 7.89560312  | 7.23062210  | 7.35951422  |
| Pd | 10.03832084 | 5.61098034  | 6.82729253  |
| Pd | 9.69624214  | 7.85070438  | 5.32874322  |
| Pd | 10.25207030 | 8.02693712  | 8.09526435  |
| Pd | 10.60843470 | 9.60545210  | 10.29765533 |
| Pd | 11.21453955 | 6.88774600  | 10.36159805 |
| Pd | 12.43736842 | 6.24748802  | 7.86852404  |
| Pd | 12.31497138 | 8.60502230  | 6.25946674  |
| Pd | 11.27244336 | 10.63031427 | 7.76889858  |
| Pd | 7.89894107  | 4.44515729  | 7.78368121  |
| Pd | 8.70122361  | 9.91285062  | 6.94124456  |
| Bi | 5.30458055  | 9.48605944  | 9.90303787  |
| Bi | 7.92327520  | 5.50002192  | 5.18454972  |
| Bi | 5.88565947  | 5.26718645  | 9.23741086  |
| Bi | 6.66495690  | 10.80322396 | 5.59377682  |
| Bi | 4.21231198  | 7.80867563  | 5.84563187  |
| Bi | 9.05812416  | 7.90409481  | 11.68310183 |
| Bi | 10.71232604 | 4.55812538  | 9.14534970  |
| Bi | 12.80210362 | 8.67241705  | 8.94784439  |
| Bi | 11.94459799 | 6.26839162  | 5.18055527  |
| Bi | 10.62666368 | 10.33696753 | 5.15111583  |
| Bi | 9.22299783  | 11.55224082 | 9.14766145  |

**Pd<sub>19</sub>Bi<sub>12</sub>**

|    |             |             |             |
|----|-------------|-------------|-------------|
| Pd | 6.88173739  | 6.78758936  | 9.44747280  |
| Pd | 8.94545938  | 8.57362621  | 10.41729527 |
| Pd | 6.89153484  | 6.79697247  | 6.59126868  |
| Pd | 7.62238271  | 8.96448613  | 8.03011656  |
| Pd | 7.20310784  | 10.66995489 | 10.30358873 |
| Pd | 8.56630325  | 11.54173957 | 8.05022683  |
| Pd | 5.14522225  | 8.96612574  | 9.42585265  |
| Pd | 5.15661464  | 8.97904780  | 6.61364376  |
| Pd | 7.21970567  | 10.69513343 | 5.77296391  |
| Pd | 5.89627846  | 4.57181277  | 8.01733080  |
| Pd | 8.96522956  | 8.60114241  | 5.65328211  |
| Pd | 9.52068725  | 6.12513885  | 9.36940898  |
| Pd | 10.29452823 | 8.33244143  | 8.03906338  |
| Pd | 11.70204878 | 9.25502150  | 5.76188077  |
| Pd | 11.25778078 | 10.85362350 | 8.05610571  |
| Pd | 11.68699331 | 9.22596310  | 10.32697575 |
| Pd | 12.20783568 | 6.64833628  | 9.40893883  |
| Pd | 12.21521444 | 6.66843366  | 6.64792117  |
| Pd | 9.53101051  | 6.14236285  | 6.66793506  |
| Bi | 7.76864342  | 4.26936182  | 9.77468227  |
| Bi | 6.58408063  | 8.38614266  | 11.56260070 |
| Bi | 9.86556107  | 11.17011664 | 10.32556225 |
| Bi | 5.86013830  | 11.16461340 | 8.03532082  |
| Bi | 4.51241901  | 6.81780036  | 8.00632798  |
| Bi | 6.61654016  | 8.41747379  | 4.48884622  |
| Bi | 7.78517114  | 4.27762480  | 6.28036266  |
| Bi | 9.88100214  | 11.19644777 | 5.78205529  |
| Bi | 13.07910785 | 8.80856099  | 8.04571326  |
| Bi | 10.76803086 | 7.05228061  | 11.57707303 |
| Bi | 11.24381196 | 4.56656926  | 8.01286542  |
| Bi | 10.79039499 | 7.09716692  | 4.47630140  |

**Pd<sub>19</sub>Bi<sub>13</sub>**

|    |             |             |             |
|----|-------------|-------------|-------------|
| Pd | 9.82847825  | 10.46274341 | 8.59105926  |
| Pd | 12.55177969 | 10.28558252 | 8.23465124  |
| Pd | 11.77755350 | 6.68640368  | 5.60460528  |
| Pd | 11.79200285 | 9.40544026  | 5.78673421  |
| Pd | 12.25996481 | 5.68491314  | 8.14558520  |
| Pd | 10.86635038 | 8.07650252  | 7.93792433  |
| Pd | 9.57937289  | 5.78296901  | 8.99789167  |
| Pd | 12.81102879 | 7.96259924  | 9.86404326  |
| Pd | 10.14791474 | 7.83702499  | 10.61586866 |
| Pd | 9.15713072  | 7.11413529  | 6.17324658  |
| Pd | 6.78783840  | 10.38893738 | 8.43435036  |
| Pd | 8.40014524  | 9.78919529  | 10.72925159 |
| Pd | 8.39667885  | 12.23983280 | 7.10173320  |
| Pd | 7.72374408  | 7.09260922  | 11.05418034 |
| Pd | 8.29456645  | 8.14570290  | 8.55419222  |
| Pd | 5.91901640  | 6.90405801  | 8.97018543  |
| Pd | 7.46537070  | 5.39828954  | 7.26947344  |
| Pd | 6.60505045  | 8.27284538  | 6.47352270  |
| Pd | 9.04631587  | 9.79631012  | 6.02227718  |
| Bi | 10.98364189 | 11.79037703 | 6.50973425  |
| Bi | 10.23468383 | 4.68177183  | 6.66446071  |
| Bi | 10.19016815 | 8.29536192  | 4.04384734  |
| Bi | 13.56792305 | 7.90228002  | 7.28517310  |
| Bi | 11.46773167 | 10.13547780 | 10.69005039 |
| Bi | 11.64021168 | 5.69202797  | 10.70957105 |
| Bi | 5.85808100  | 8.98074607  | 10.73695754 |
| Bi | 8.17696478  | 12.24747588 | 9.74757475  |
| Bi | 7.29190550  | 4.78408669  | 9.88185327  |
| Bi | 6.55035455  | 10.83388654 | 5.81936457  |
| Bi | 4.91447630  | 6.04590403  | 6.63120683  |
| Bi | 7.19448184  | 6.41447196  | 4.58927488  |
| Bi | 4.42516871  | 8.99365511  | 7.92919519  |

**Pd<sub>19</sub>Bi<sub>14</sub>**

|    |             |             |             |
|----|-------------|-------------|-------------|
| Pd | 8.09038539  | 8.51147543  | 11.38645061 |
| Pd | 8.51038642  | 6.08711568  | 8.22237838  |
| Pd | 12.56170365 | 9.70773517  | 8.54262262  |
| Pd | 7.60294348  | 11.07316365 | 9.57663760  |
| Pd | 10.29546623 | 10.16917684 | 9.98672246  |
| Pd | 10.30412934 | 7.37591986  | 10.12663709 |
| Pd | 6.32880959  | 7.07736541  | 9.84010802  |
| Pd | 12.64872529 | 6.99850883  | 8.74522951  |
| Pd | 8.14749445  | 8.64295499  | 8.79182892  |
| Pd | 10.44281010 | 8.23181749  | 7.56760918  |
| Pd | 9.37628904  | 10.67232233 | 7.52308786  |
| Pd | 8.10886551  | 8.51133700  | 6.12081611  |
| Pd | 6.27727474  | 6.66567417  | 6.76305019  |
| Pd | 6.99341919  | 10.96511439 | 6.34581666  |
| Pd | 11.60361348 | 10.48690467 | 6.08851405  |
| Pd | 5.69945601  | 9.11493509  | 7.98337973  |
| Pd | 10.50160562 | 8.15920783  | 4.88989656  |
| Pd | 11.26397699 | 5.94681084  | 6.47085206  |
| Pd | 10.43487483 | 8.99328449  | 12.44518673 |
| Bi | 5.63652420  | 9.54412117  | 10.79237868 |
| Bi | 12.55217068 | 8.62267412  | 10.93638302 |
| Bi | 10.86092938 | 5.01171054  | 8.90055536  |
| Bi | 8.74484069  | 11.02047147 | 12.00906738 |
| Bi | 11.43699064 | 12.07490357 | 8.37336515  |
| Bi | 8.33204708  | 5.74879550  | 11.03531743 |
| Bi | 12.88472401 | 8.17085375  | 6.26930916  |
| Bi | 8.12331586  | 13.01813698 | 7.80998268  |
| Bi | 6.20425964  | 4.67266357  | 8.58338672  |
| Bi | 8.77734510  | 5.99330802  | 5.50933798  |
| Bi | 5.26042454  | 11.74985593 | 8.24284356  |
| Bi | 5.56505355  | 8.91731775  | 5.32265769  |
| Bi | 9.24852593  | 10.57413663 | 4.78118675  |
| Bi | 4.09310608  | 7.01439435  | 8.32719798  |

**Pd<sub>19</sub>Bi<sub>15</sub>**

|    |             |             |             |
|----|-------------|-------------|-------------|
| Pd | 9.52735917  | 7.66514355  | 6.08509871  |
| Pd | 5.84814682  | 8.33664406  | 7.62434036  |
| Pd | 9.34882327  | 11.27888007 | 8.27086233  |
| Pd | 11.27536147 | 6.77471958  | 7.99400256  |
| Pd | 10.95273546 | 10.09103067 | 6.38593711  |
| Pd | 7.87834582  | 9.99594627  | 6.42799327  |
| Pd | 13.15115638 | 9.00036495  | 7.74066228  |
| Pd | 7.51383502  | 6.20610074  | 7.15735209  |
| Pd | 7.21005805  | 12.63654068 | 7.37086402  |
| Pd | 8.53164777  | 8.28915479  | 8.52389651  |
| Pd | 6.59024954  | 10.64289067 | 9.01283969  |
| Pd | 10.83998256 | 9.30331197  | 9.09591463  |
| Pd | 8.64402333  | 9.85524253  | 10.78572854 |
| Pd | 6.31376687  | 8.07829322  | 10.29906417 |
| Pd | 10.30784280 | 7.29415561  | 10.68751815 |
| Pd | 10.69129249 | 11.75059750 | 10.51791603 |
| Pd | 8.05474345  | 6.02552858  | 10.03342845 |
| Pd | 8.11756164  | 3.95702826  | 8.38058587  |
| Pd | 13.11999885 | 10.18175778 | 10.40227436 |
| Bi | 9.39221741  | 9.63787147  | 4.19321799  |
| Bi | 9.78296234  | 4.97439609  | 6.50671463  |
| Bi | 9.36055675  | 12.30552700 | 5.79378374  |
| Bi | 5.34876379  | 10.82194571 | 6.58307215  |
| Bi | 12.17195813 | 7.80762903  | 5.59032242  |
| Bi | 12.25438004 | 11.56028756 | 8.25031893  |
| Bi | 6.86398303  | 7.78100892  | 5.14826513  |
| Bi | 8.06566836  | 12.52995442 | 10.23338651 |
| Bi | 12.99515309 | 7.53567705  | 9.95373774  |
| Bi | 5.62093401  | 5.84906674  | 8.94984899  |
| Bi | 6.06903468  | 10.35437390 | 11.73805470 |
| Bi | 10.34839790 | 4.75272065  | 9.64956613  |
| Bi | 8.07955808  | 7.54825500  | 12.24211633 |
| Bi | 11.05440173 | 9.57111833  | 12.01272067 |
| Bi | 4.14111290  | 9.50200132  | 9.46278783  |

**Pd<sub>20</sub>**

|    |            |            |            |
|----|------------|------------|------------|
| Pd | 7.79284367 | 8.12206098 | 4.72561354 |
| Pd | 9.94179487 | 5.68421564 | 6.68609898 |
| Pd | 9.86369613 | 7.37123996 | 8.79792403 |
| Pd | 7.76796119 | 4.44796326 | 7.56986180 |
| Pd | 9.95187748 | 8.33038802 | 6.31903740 |
| Pd | 7.78413254 | 5.46676770 | 5.07871529 |
| Pd | 9.76366886 | 9.86620493 | 8.34135526 |
| Pd | 9.78286951 | 4.84956785 | 9.08284011 |
| Pd | 9.88123896 | 6.70815058 | 4.36035276 |
| Pd | 7.72763077 | 7.11631082 | 7.20373663 |
| Pd | 5.59610182 | 5.79955226 | 8.15206909 |
| Pd | 7.66176981 | 8.79789111 | 9.31270920 |
| Pd | 5.58104573 | 8.63884543 | 7.72890885 |
| Pd | 5.58570272 | 6.90182718 | 5.58426594 |
| Pd | 7.75932541 | 9.79688609 | 6.79517011 |
| Pd | 7.68327635 | 6.15103466 | 9.71123444 |
| Pd | 5.53278788 | 7.52184880 | 9.99012864 |
| Pd | 5.69575232 | 9.43271994 | 5.33162027 |
| Pd | 5.69706351 | 4.40338487 | 6.04674135 |
| Pd | 3.66102542 | 7.10721843 | 7.24596190 |

**Pd<sub>20</sub>Bi**

|    |             |            |            |
|----|-------------|------------|------------|
| Pd | 9.41085766  | 6.43866255 | 4.63869762 |
| Pd | 9.43027794  | 4.64949412 | 6.41357475 |
| Pd | 9.43311741  | 5.19852066 | 8.87192185 |
| Pd | 9.53057187  | 7.64006197 | 9.55796956 |
| Pd | 9.46510201  | 8.8887629  | 5.30359651 |
| Pd | 4.95327269  | 6.47736252 | 4.66223903 |
| Pd | 4.96176171  | 4.62381695 | 6.44098989 |
| Pd | 4.98887652  | 5.26964300 | 8.92794842 |
| Pd | 5.04207630  | 7.74408850 | 9.65377299 |
| Pd | 5.04344454  | 9.61196057 | 7.85985480 |
| Pd | 4.97957833  | 8.96568105 | 5.35025208 |
| Pd | 7.27312713  | 8.92356597 | 8.97983067 |
| Pd | 7.22935795  | 9.61741625 | 6.51269648 |
| Pd | 7.18906089  | 7.80432781 | 4.64304132 |
| Pd | 7.17311273  | 5.27831542 | 5.26109949 |
| Pd | 7.18829585  | 4.57073380 | 7.74898373 |
| Pd | 7.24077472  | 6.39228211 | 9.60804312 |
| Pd | 5.57623675  | 7.12177151 | 7.14461176 |
| Pd | 10.61898982 | 7.00195891 | 7.05469012 |
| Pd | 8.09904774  | 7.04988395 | 7.10645844 |
| Bi | 9.65244879  | 9.52309660 | 7.79683560 |

**Pd<sub>20</sub>Bi<sub>2</sub>**

|    |             |             |            |
|----|-------------|-------------|------------|
| Pd | 10.90172074 | 5.99031874  | 5.83210538 |
| Pd | 10.49241668 | 8.43299438  | 4.88660341 |
| Pd | 12.14354001 | 7.95068600  | 7.03331139 |
| Pd | 9.51185814  | 7.77782826  | 7.15915339 |
| Pd | 8.62236867  | 7.69301419  | 9.88736195 |
| Pd | 8.39168029  | 9.88087030  | 8.53610748 |
| Pd | 8.18387133  | 5.69186977  | 8.51869204 |
| Pd | 10.84599265 | 8.84321080  | 9.19812397 |
| Pd | 10.80646458 | 6.18993366  | 8.63831731 |
| Pd | 9.73719636  | 4.12454485  | 7.26238259 |
| Pd | 6.15826984  | 8.44482610  | 9.47886720 |
| Pd | 5.66251579  | 6.02931511  | 8.50647395 |
| Pd | 8.02389815  | 7.72227655  | 4.47733336 |
| Pd | 4.47858461  | 8.03331181  | 7.32166401 |
| Pd | 8.27236502  | 9.90195309  | 5.83780524 |
| Pd | 5.81251973  | 8.89578949  | 5.15791387 |
| Pd | 7.10337109  | 7.80035983  | 7.19435756 |
| Pd | 5.76787412  | 6.23735107  | 5.72383675 |
| Pd | 8.37430057  | 5.69069264  | 5.82390734 |
| Pd | 6.80578906  | 4.14203586  | 7.08242782 |
| Bi | 10.70213641 | 10.24652160 | 6.93438939 |
| Bi | 5.97079815  | 10.28649891 | 7.43952333 |

**Pd<sub>20</sub>Bi<sub>3</sub>**

|    |             |             |            |
|----|-------------|-------------|------------|
| Pd | 7.20946497  | 5.56961117  | 9.12368898 |
| Pd | 6.24557382  | 10.01796038 | 8.15107498 |
| Pd | 9.70448492  | 7.32382468  | 7.23131262 |
| Pd | 9.23947790  | 4.90710467  | 7.80321909 |
| Pd | 9.21390775  | 7.04593374  | 9.80476935 |
| Pd | 8.73724767  | 9.41971736  | 8.65276224 |
| Pd | 5.91421075  | 9.05152783  | 5.70580145 |
| Pd | 4.87725492  | 5.39979636  | 8.19360110 |
| Pd | 11.45943569 | 5.99760868  | 8.78153588 |
| Pd | 4.71061617  | 7.99032631  | 8.05543801 |
| Pd | 6.90878274  | 5.02793844  | 6.44064072 |
| Pd | 6.77895101  | 6.80474145  | 4.39084715 |
| Pd | 8.98377647  | 5.83432862  | 5.21497254 |
| Pd | 8.49260001  | 8.55311822  | 5.15029770 |
| Pd | 12.37576571 | 7.70465305  | 6.88970676 |
| Pd | 7.15654343  | 7.42904927  | 7.31876982 |
| Pd | 10.50301915 | 9.68051395  | 6.50206093 |
| Pd | 11.30781274 | 5.34194882  | 6.25263581 |
| Pd | 10.84538604 | 7.58667081  | 4.79862555 |
| Pd | 6.78213063  | 8.07362973  | 9.81512366 |
| Bi | 11.27803085 | 8.68613042  | 9.05993580 |
| Bi | 8.05033311  | 10.80153829 | 6.42223625 |
| Bi | 4.66831556  | 6.54734591  | 5.85227391 |

**Pd<sub>20</sub>Bi<sub>4</sub>**

|    |             |             |            |
|----|-------------|-------------|------------|
| Pd | 10.99818276 | 9.02483603  | 9.38157576 |
| Pd | 11.20234699 | 6.50712004  | 9.48962605 |
| Pd | 8.77206135  | 9.72901299  | 8.18291180 |
| Pd | 11.78188091 | 6.33847956  | 5.21440862 |
| Pd | 12.58769021 | 7.80096740  | 7.43765631 |
| Pd | 11.52862507 | 8.85849561  | 5.04779178 |
| Pd | 10.10495124 | 7.57999696  | 7.12710854 |
| Pd | 9.05137923  | 5.27280345  | 8.44652465 |
| Pd | 8.72141018  | 7.56114555  | 9.54612257 |
| Pd | 6.41938999  | 8.71420863  | 8.67667895 |
| Pd | 9.03401608  | 9.60254015  | 5.58129800 |
| Pd | 6.86712344  | 10.51540556 | 6.64814146 |
| Pd | 7.64186277  | 7.29140798  | 6.85745456 |
| Pd | 9.38829700  | 7.36380703  | 4.43335698 |
| Pd | 9.41370056  | 5.21727146  | 5.81267742 |
| Pd | 7.17969469  | 5.90456633  | 4.55885472 |
| Pd | 6.51897681  | 6.05572339  | 8.91790160 |
| Pd | 5.24188465  | 6.44008778  | 6.27470400 |
| Pd | 6.71218944  | 8.48363210  | 4.81510275 |
| Pd | 4.20420286  | 7.28948376  | 8.52232743 |
| Bi | 11.56662644 | 5.03753661  | 7.42251828 |
| Bi | 11.17968133 | 10.31396302 | 7.13519154 |
| Bi | 7.05314475  | 4.46166652  | 6.84349942 |
| Bi | 4.77255990  | 9.03214208  | 6.60919097 |

**Pd<sub>20</sub>Bi<sub>5</sub>**

|    |             |             |            |
|----|-------------|-------------|------------|
| Pd | 5.67666155  | 8.36424514  | 4.44343127 |
| Pd | 4.77384666  | 6.51881038  | 5.94357933 |
| Pd | 8.27032162  | 8.59925959  | 4.61717534 |
| Pd | 5.67449951  | 8.59435632  | 9.42701837 |
| Pd | 4.62694269  | 9.11047596  | 6.95880458 |
| Pd | 6.74778786  | 10.65604858 | 8.28933787 |
| Pd | 6.87431626  | 7.95571722  | 6.99616767 |
| Pd | 6.72769073  | 5.13562158  | 7.16357539 |
| Pd | 7.27491579  | 6.24771409  | 4.92028058 |
| Pd | 9.98116567  | 6.61819887  | 4.67942818 |
| Pd | 8.80305120  | 9.82056270  | 6.82736452 |
| Pd | 10.73180252 | 9.19747396  | 5.22714490 |
| Pd | 9.14507915  | 6.88171455  | 7.14264409 |
| Pd | 8.33513364  | 8.69768299  | 9.22547980 |
| Pd | 7.25634192  | 6.40773189  | 9.44792120 |
| Pd | 9.95261693  | 6.66762070  | 9.72576647 |
| Pd | 9.06824488  | 4.51567716  | 6.00194492 |
| Pd | 11.22009566 | 5.32202362  | 7.72555957 |
| Pd | 10.85557923 | 8.60132986  | 8.12755454 |
| Pd | 11.13513737 | 11.03741394 | 7.05310936 |
| Bi | 4.73507737  | 6.38004009  | 8.50991395 |
| Bi | 6.52044623  | 10.52218156 | 5.62865574 |
| Bi | 8.84162393  | 4.45100071  | 8.66228531 |
| Bi | 12.03904966 | 7.23239945  | 6.16755853 |
| Bi | 9.47108836  | 11.03886157 | 9.07555755 |

**Pd<sub>20</sub>Bi<sub>6</sub>**

|    |             |             |            |
|----|-------------|-------------|------------|
| Pd | 12.16171653 | 7.57958405  | 5.87593636 |
| Pd | 10.75078558 | 10.37080846 | 9.26404467 |
| Pd | 8.18851568  | 9.97651033  | 8.96260958 |
| Pd | 9.78989670  | 8.71391915  | 7.00855804 |
| Pd | 11.46063730 | 10.53364339 | 6.45343332 |
| Pd | 8.66134279  | 10.58228541 | 5.39309120 |
| Pd | 6.68599258  | 11.44844417 | 7.17735260 |
| Pd | 7.97610091  | 8.00847757  | 4.75376832 |
| Pd | 9.90524488  | 6.32367701  | 5.29859584 |
| Pd | 4.41418582  | 9.84324114  | 6.72171540 |
| Pd | 10.77457509 | 6.18531199  | 7.79737532 |
| Pd | 8.21739458  | 6.81853506  | 7.26443796 |
| Pd | 8.89583945  | 4.33347408  | 7.00719267 |
| Pd | 6.97854839  | 7.57867408  | 9.47603345 |
| Pd | 6.23514692  | 5.30952409  | 7.57582892 |
| Pd | 5.56776811  | 9.85457439  | 9.11173419 |
| Pd | 9.67767915  | 7.88862630  | 9.58327232 |
| Pd | 7.41862934  | 5.46433475  | 5.12189348 |
| Pd | 6.91757624  | 8.89817973  | 7.00969586 |
| Pd | 5.52829191  | 7.24886799  | 5.55306771 |
| Bi | 9.37554727  | 11.92190966 | 7.56685442 |
| Bi | 12.19056194 | 8.39769642  | 8.36448975 |
| Bi | 10.51754452 | 8.94892295  | 4.31875398 |
| Bi | 6.09463643  | 10.02583069 | 4.71855301 |
| Bi | 8.56670371  | 5.34590633  | 9.44443070 |
| Bi | 4.68722117  | 7.48282946  | 8.07191537 |

**Pd<sub>20</sub>Bi<sub>7</sub>**

|    |             |             |             |
|----|-------------|-------------|-------------|
| Pd | 7.89128675  | 8.06415982  | 9.63019988  |
| Pd | 6.76457669  | 11.70429434 | 7.30125630  |
| Pd | 5.42257738  | 7.52786059  | 8.77666304  |
| Pd | 8.58124036  | 4.39522613  | 7.10923054  |
| Pd | 7.16648949  | 7.90446270  | 4.69935946  |
| Pd | 7.46619427  | 10.57972719 | 4.83695194  |
| Pd | 9.25796491  | 6.42141902  | 5.42086875  |
| Pd | 4.46919592  | 9.73299887  | 7.46830426  |
| Pd | 5.48878854  | 4.95116413  | 7.63206190  |
| Pd | 5.01369585  | 7.27444411  | 6.23161716  |
| Pd | 7.45200969  | 6.75558709  | 7.27500529  |
| Pd | 7.06615956  | 9.22798823  | 7.11696993  |
| Pd | 11.23069187 | 10.53459221 | 8.50937486  |
| Pd | 9.54402877  | 8.51803159  | 7.29868127  |
| Pd | 11.97852053 | 7.75591102  | 7.85606096  |
| Pd | 9.72951559  | 6.26022499  | 8.67771033  |
| Pd | 9.38544488  | 11.04210854 | 6.51306802  |
| Pd | 8.63264091  | 10.54531461 | 8.94778814  |
| Pd | 9.53368277  | 8.97110608  | 4.68559735  |
| Pd | 11.66024895 | 7.40648101  | 5.10250913  |
| Bi | 6.07557860  | 10.14503860 | 9.55762693  |
| Bi | 7.27284910  | 5.37547199  | 9.56098877  |
| Bi | 6.70399982  | 5.23852133  | 5.20247754  |
| Bi | 5.07929745  | 9.60231243  | 4.92330130  |
| Bi | 10.47312676 | 8.53051123  | 10.03156133 |
| Bi | 11.29214190 | 5.32612290  | 6.73101575  |
| Bi | 11.77431864 | 9.86362021  | 6.03107950  |

**Pd<sub>20</sub>Bi<sub>8</sub>**

|    |             |             |             |
|----|-------------|-------------|-------------|
| Pd | 6.23962627  | 6.03843950  | 8.60356012  |
| Pd | 6.32822973  | 8.81655559  | 9.12862437  |
| Pd | 8.37797027  | 7.28380029  | 7.58336366  |
| Pd | 8.75710262  | 5.05998372  | 9.21009933  |
| Pd | 8.96812984  | 9.19558852  | 9.30543788  |
| Pd | 12.81210952 | 7.23618728  | 9.38226145  |
| Pd | 12.96264342 | 9.64637343  | 8.05327563  |
| Pd | 10.29195054 | 7.03667347  | 10.08569471 |
| Pd | 10.54772021 | 11.01747029 | 8.29838011  |
| Pd | 10.83244312 | 8.15034463  | 7.60301129  |
| Pd | 6.30056031  | 6.70887207  | 5.98094211  |
| Pd | 8.75689184  | 6.11971718  | 5.01026492  |
| Pd | 8.92254428  | 9.73267684  | 6.55744357  |
| Pd | 6.20268262  | 9.48353974  | 6.48599629  |
| Pd | 10.30158885 | 8.33222972  | 4.77517302  |
| Pd | 12.92144588 | 5.70629278  | 7.08321761  |
| Pd | 10.21298540 | 5.48152661  | 7.08450128  |
| Pd | 12.88864114 | 8.13638083  | 5.66739564  |
| Pd | 7.67483363  | 4.63842537  | 6.87855612  |
| Pd | 11.42777633 | 9.32794309  | 10.12775361 |
| Bi | 7.45524116  | 11.10870664 | 8.28119410  |
| Bi | 4.48146852  | 7.76003860  | 7.57088946  |
| Bi | 11.59381200 | 4.83418147  | 9.25863697  |
| Bi | 7.67308992  | 7.08410092  | 10.61752463 |
| Bi | 14.65137853 | 7.65941572  | 7.56919804  |
| Bi | 7.62461096  | 8.48366660  | 4.49796181  |
| Bi | 11.52325882 | 10.45059871 | 5.90147571  |
| Bi | 11.53234144 | 5.96334734  | 4.82531146  |

**Pd<sub>20</sub>Bi<sub>9</sub>**

|    |             |             |             |
|----|-------------|-------------|-------------|
| Pd | 10.30421818 | 6.15331352  | 5.84390361  |
| Pd | 8.95571843  | 8.24770374  | 5.07078542  |
| Pd | 6.54846130  | 8.24487790  | 5.95434259  |
| Pd | 12.94394815 | 6.76683272  | 6.20097753  |
| Pd | 8.51879377  | 9.46715181  | 7.59401804  |
| Pd | 12.95321177 | 9.64077661  | 8.97030062  |
| Pd | 10.36843062 | 10.34171609 | 5.79003020  |
| Pd | 13.00355755 | 9.67118724  | 6.17590114  |
| Pd | 10.89912310 | 8.23863477  | 7.63261572  |
| Pd | 8.99367435  | 11.99065882 | 7.59719418  |
| Pd | 8.91360059  | 4.51534557  | 7.44817265  |
| Pd | 8.49058096  | 7.04139911  | 7.57803146  |
| Pd | 6.09327791  | 5.99804024  | 7.40574847  |
| Pd | 7.73399415  | 5.90958491  | 5.35421823  |
| Pd | 10.29785063 | 10.35826040 | 9.40638484  |
| Pd | 6.39025088  | 8.14204694  | 9.19740986  |
| Pd | 8.88563710  | 8.18795039  | 10.05440844 |
| Pd | 6.00227191  | 10.38931177 | 7.56354221  |
| Pd | 10.31200499 | 6.06406958  | 9.32596796  |
| Pd | 12.96278226 | 6.73078684  | 8.97188869  |
| Bi | 11.57947201 | 8.22749571  | 4.47265749  |
| Bi | 14.66410524 | 8.18681677  | 7.57426546  |
| Bi | 7.66088249  | 10.74121086 | 5.39308815  |
| Bi | 11.79541225 | 11.62969075 | 7.59826802  |
| Bi | 11.78829671 | 4.75938633  | 7.55038391  |
| Bi | 4.45047111  | 8.14091332  | 7.47297680  |
| Bi | 11.50835499 | 8.17955502  | 10.64132912 |
| Bi | 7.59327530  | 5.68330422  | 9.66672256  |
| Bi | 7.48886295  | 10.57680289 | 9.79948527  |

**Pd<sub>20</sub>Bi<sub>10</sub>**

|    |             |             |             |
|----|-------------|-------------|-------------|
| Pd | 6.44650491  | 7.08628910  | 9.54862512  |
| Pd | 9.27890586  | 7.07927048  | 9.52247513  |
| Pd | 6.49589519  | 9.83930832  | 9.71432480  |
| Pd | 13.37108653 | 8.84137729  | 9.49543738  |
| Pd | 10.92841708 | 8.70834557  | 10.80528876 |
| Pd | 9.12190234  | 9.86644911  | 9.26958805  |
| Pd | 8.08565365  | 10.37534694 | 5.62086209  |
| Pd | 10.09109536 | 11.28430577 | 7.23345530  |
| Pd | 12.60612010 | 9.87026428  | 6.94033866  |
| Pd | 7.78404883  | 8.27990425  | 7.55180303  |
| Pd | 5.52367902  | 9.99268758  | 7.08289427  |
| Pd | 9.12179307  | 7.94990060  | 5.30780977  |
| Pd | 7.23638502  | 6.08711854  | 5.39462339  |
| Pd | 5.20229623  | 7.18670679  | 7.01857059  |
| Pd | 11.81101322 | 7.59333568  | 5.26747119  |
| Pd | 11.89799255 | 6.73336227  | 9.38292544  |
| Pd | 8.99879090  | 5.62949201  | 7.31743431  |
| Pd | 10.49364793 | 8.35606265  | 7.59672058  |
| Pd | 11.69398450 | 5.42852784  | 7.01603190  |
| Pd | 7.93427757  | 4.85618883  | 9.81984368  |
| Bi | 11.69139843 | 10.80734586 | 9.28964831  |
| Bi | 8.06476477  | 8.44707927  | 11.37509069 |
| Bi | 7.45248567  | 11.56097761 | 7.91266980  |
| Bi | 10.77159568 | 10.06148932 | 4.97846628  |
| Bi | 4.29336590  | 8.61488210  | 9.02428586  |
| Bi | 10.08991160 | 5.53020116  | 4.89640296  |
| Bi | 6.25630138  | 8.54146031  | 4.99477304  |
| Bi | 10.51735963 | 4.52618518  | 9.25726843  |
| Bi | 13.53165955 | 7.35550769  | 7.29591002  |
| Bi | 6.38391112  | 4.97672870  | 7.69007559  |

**Pd<sub>20</sub>Bi<sub>11</sub>**

|    |             |             |             |
|----|-------------|-------------|-------------|
| Pd | 10.86399817 | 6.39884387  | 6.95468352  |
| Pd | 8.20169131  | 7.01736399  | 7.07120605  |
| Pd | 12.12705764 | 7.71421140  | 9.02342342  |
| Pd | 10.15521766 | 8.98132358  | 7.55741213  |
| Pd | 8.04103228  | 11.53543449 | 6.06781500  |
| Pd | 8.71039787  | 9.03435438  | 5.26780304  |
| Pd | 5.62396599  | 7.82927288  | 6.94816577  |
| Pd | 11.39950476 | 8.37746374  | 5.12300563  |
| Pd | 12.60753507 | 9.93310621  | 7.18491516  |
| Pd | 10.20241323 | 11.70836900 | 8.00424595  |
| Pd | 10.86669758 | 8.48838427  | 11.26547007 |
| Pd | 9.50060178  | 7.03556411  | 9.49981379  |
| Pd | 9.20237867  | 10.04643116 | 9.84730257  |
| Pd | 6.50312694  | 10.20993166 | 10.22878686 |
| Pd | 5.89427755  | 5.48289376  | 8.26240861  |
| Pd | 7.66569072  | 9.48469874  | 7.76746529  |
| Pd | 6.85362687  | 7.62003832  | 9.54561003  |
| Pd | 8.95890243  | 4.61578342  | 7.89907088  |
| Pd | 5.39737429  | 10.75309662 | 7.55114446  |
| Pd | 6.86842952  | 7.15214504  | 4.67137337  |
| Bi | 11.33187835 | 5.08950408  | 9.21801839  |
| Bi | 9.53550004  | 6.49775900  | 4.62507696  |
| Bi | 6.96927809  | 4.83258188  | 6.03200640  |
| Bi | 10.65175040 | 10.93169153 | 5.52007314  |
| Bi | 13.33298842 | 7.41955318  | 6.68611121  |
| Bi | 11.89282644 | 10.38478636 | 9.70610009  |
| Bi | 8.18279544  | 8.43493604  | 11.66119340 |
| Bi | 7.56979989  | 12.09075512 | 8.63818790  |
| Bi | 4.51556686  | 8.79781965  | 9.12678539  |
| Bi | 7.71980243  | 5.10950751  | 10.15404364 |
| Bi | 6.12362158  | 9.80141417  | 5.15809524  |

**Pd<sub>20</sub>Bi<sub>12</sub>**

|    |             |             |             |
|----|-------------|-------------|-------------|
| Pd | 6.89312368  | 9.39005318  | 9.57177677  |
| Pd | 9.03156662  | 7.59729629  | 10.42138361 |
| Pd | 6.88259226  | 9.36360832  | 6.47297170  |
| Pd | 7.62455468  | 7.38608385  | 8.03688089  |
| Pd | 7.32754038  | 5.46318129  | 10.28922611 |
| Pd | 8.77297349  | 5.02717930  | 8.05025560  |
| Pd | 5.19389568  | 7.21426650  | 9.46164820  |
| Pd | 5.19139072  | 7.18886096  | 6.61458622  |
| Pd | 7.32191304  | 5.41736883  | 5.80784909  |
| Pd | 6.19702675  | 11.53721739 | 8.01404916  |
| Pd | 9.02332847  | 7.55209422  | 5.65017850  |
| Pd | 9.48044859  | 10.16886501 | 9.43207292  |
| Pd | 10.29584870 | 7.95287489  | 8.02893314  |
| Pd | 11.79512083 | 7.05317227  | 5.75608432  |
| Pd | 11.46122010 | 5.46654670  | 8.03956226  |
| Pd | 11.81595435 | 7.07884177  | 10.29104045 |
| Pd | 12.20184184 | 9.64318476  | 9.38324642  |
| Pd | 12.18234901 | 9.62756200  | 6.63952130  |
| Pd | 8.81756885  | 12.50830298 | 8.00308287  |
| Pd | 9.46559523  | 10.14332749 | 6.61314118  |
| Bi | 7.58246427  | 11.88395354 | 10.22138923 |
| Bi | 6.67942580  | 7.66486843  | 11.59985083 |
| Bi | 10.08195678 | 5.07264533  | 10.34055736 |
| Bi | 5.93818665  | 5.07218341  | 8.05404483  |
| Bi | 4.60794647  | 9.38950878  | 8.02188453  |
| Bi | 6.67540375  | 7.60600676  | 4.46919047  |
| Bi | 7.57050397  | 11.84942510 | 5.79911458  |
| Bi | 10.07774068 | 5.03009929  | 5.75467139  |
| Bi | 13.20151535 | 7.53800569  | 8.01429001  |
| Bi | 10.78703276 | 9.18938240  | 11.55690085 |
| Bi | 11.32171847 | 11.72350270 | 8.00703266  |
| Bi | 10.74938778 | 9.15422707  | 4.48065450  |

**Pd<sub>20</sub>Bi<sub>13</sub>**

|    |             |             |             |
|----|-------------|-------------|-------------|
| Pd | 8.31786053  | 8.84173203  | 5.96276726  |
| Pd | 10.26983229 | 9.40382786  | 7.91288868  |
| Pd | 10.63651862 | 10.02691788 | 5.19734850  |
| Pd | 10.27116661 | 12.06659401 | 7.05579523  |
| Pd | 12.10493625 | 8.02635702  | 6.42612143  |
| Pd | 12.90747955 | 8.91526805  | 8.93169911  |
| Pd | 11.72615217 | 11.44412762 | 9.34785980  |
| Pd | 9.49740883  | 10.25410867 | 10.40460912 |
| Pd | 8.00586315  | 10.82535103 | 8.11532257  |
| Pd | 5.98737156  | 10.42184702 | 6.24318300  |
| Pd | 10.26990346 | 5.09269422  | 9.37315787  |
| Pd | 10.65438059 | 7.74953591  | 9.98986209  |
| Pd | 10.57353916 | 5.67500595  | 6.66430797  |
| Pd | 8.77182855  | 7.10908827  | 8.12414977  |
| Pd | 7.91171420  | 8.11004430  | 10.57827653 |
| Pd | 6.55977298  | 8.49613872  | 8.04966922  |
| Pd | 6.08472286  | 10.14757238 | 10.02168605 |
| Pd | 7.52746835  | 5.41320386  | 9.96729273  |
| Pd | 6.13556898  | 5.89921719  | 7.60982138  |
| Pd | 8.04930830  | 6.11939218  | 5.59942184  |
| Bi | 10.20526946 | 7.40333629  | 4.66239043  |
| Bi | 8.31570784  | 11.45181902 | 5.39582084  |
| Bi | 12.59804404 | 10.69532479 | 6.94452645  |
| Bi | 12.45630468 | 6.32414972  | 8.43400596  |
| Bi | 11.93140471 | 9.67515759  | 11.30659473 |
| Bi | 9.36541883  | 12.72618353 | 9.45541359  |
| Bi | 5.68610203  | 12.22868507 | 8.28672154  |
| Bi | 9.38038090  | 6.16254371  | 11.67436197 |
| Bi | 8.34340813  | 4.36564904  | 7.63714133  |
| Bi | 7.58669395  | 10.19385937 | 12.14396258 |
| Bi | 5.88247696  | 7.71133875  | 5.58097841  |
| Bi | 4.07669226  | 9.75068575  | 8.10904326  |
| Bi | 5.45761470  | 7.10224570  | 10.02073265 |

**Pd<sub>20</sub>Bi<sub>14</sub>**

|    |             |             |             |
|----|-------------|-------------|-------------|
| Pd | 7.48229891  | 12.30808982 | 9.83338095  |
| Pd | 10.69416625 | 9.34707595  | 9.05909374  |
| Pd | 8.94594854  | 7.22638097  | 9.82285131  |
| Pd | 6.45580542  | 7.92781143  | 10.92439483 |
| Pd | 10.11103785 | 8.88903159  | 11.67914410 |
| Pd | 9.98901692  | 11.97759078 | 8.51519359  |
| Pd | 10.90548285 | 6.26820745  | 11.49229434 |
| Pd | 8.18058478  | 9.81345121  | 9.82681702  |
| Pd | 11.42760079 | 6.67475173  | 8.82597170  |
| Pd | 11.41842004 | 9.45214163  | 6.47962350  |
| Pd | 13.25197102 | 8.53567422  | 8.17898026  |
| Pd | 10.25722238 | 4.96512794  | 6.98719982  |
| Pd | 9.46093768  | 7.53169798  | 7.09046204  |
| Pd | 8.73107638  | 10.13976759 | 7.00771209  |
| Pd | 6.20642140  | 10.60767477 | 7.81131477  |
| Pd | 7.35856212  | 8.32900259  | 5.54081072  |
| Pd | 7.10311067  | 8.11639262  | 8.19043295  |
| Pd | 4.52174372  | 8.49916631  | 8.76284516  |
| Pd | 5.60625818  | 6.44186532  | 6.65608037  |
| Pd | 7.80461599  | 5.45241651  | 8.19952673  |
| Bi | 7.69669345  | 9.84866818  | 12.60205986 |
| Bi | 7.75195489  | 12.72403218 | 7.20878370  |
| Bi | 8.43601854  | 6.80809770  | 12.44985876 |
| Bi | 12.58557899 | 8.25280244  | 10.74915160 |
| Bi | 9.90057033  | 11.58221747 | 11.08950157 |
| Bi | 9.89742163  | 4.60461014  | 9.65641127  |
| Bi | 12.56093777 | 11.18169760 | 8.17357870  |
| Bi | 12.03324770 | 6.89085586  | 6.20619483  |
| Bi | 10.49164123 | 11.90590032 | 5.69027685  |
| Bi | 9.68369928  | 9.12467201  | 4.48540274  |
| Bi | 5.48087629  | 10.43472262 | 10.36095674 |
| Bi | 4.84860696  | 8.95925897  | 6.17397346  |
| Bi | 5.45492606  | 6.04749034  | 9.28613047  |
| Bi | 7.98396799  | 5.74580519  | 5.57419445  |

**Pd<sub>20</sub>Bi<sub>15</sub>**

|    |             |             |             |
|----|-------------|-------------|-------------|
| Pd | 9.38823772  | 8.15080360  | 11.29833739 |
| Pd | 11.91111089 | 10.02577681 | 9.11726503  |
| Pd | 7.30950061  | 11.29231015 | 8.44217719  |
| Pd | 7.12671016  | 9.63590931  | 10.52500984 |
| Pd | 9.61318951  | 11.09417813 | 10.21013985 |
| Pd | 11.84763159 | 7.52285249  | 10.08294793 |
| Pd | 9.04393827  | 13.26750182 | 8.63530371  |
| Pd | 9.67648629  | 8.73490802  | 8.78036654  |
| Pd | 9.94447552  | 11.02067149 | 7.21758405  |
| Pd | 12.19660347 | 8.19908142  | 6.91967968  |
| Pd | 13.02789389 | 10.83099077 | 6.95379535  |
| Pd | 8.63948133  | 10.49661954 | 4.87870787  |
| Pd | 9.61680334  | 8.37593332  | 6.10804536  |
| Pd | 10.35789403 | 6.27331108  | 8.02643547  |
| Pd | 7.91353953  | 6.56864197  | 9.46720626  |
| Pd | 8.02142513  | 6.29371570  | 6.50553059  |
| Pd | 7.34680701  | 8.68353913  | 7.74759229  |
| Pd | 5.46721384  | 7.70041909  | 9.61449876  |
| Pd | 4.97186360  | 7.99401683  | 6.76797813  |
| Pd | 6.13670324  | 10.58542070 | 6.12261367  |
| Bi | 8.49244590  | 10.32125063 | 12.72633367 |
| Bi | 10.09105466 | 5.60549772  | 10.80021514 |
| Bi | 7.39725462  | 12.50418700 | 10.80933500 |
| Bi | 11.59970095 | 12.55795012 | 8.69044201  |
| Bi | 11.54308428 | 9.74416812  | 11.71240266 |
| Bi | 7.92914470  | 12.62738299 | 6.21037559  |
| Bi | 14.18083344 | 8.66025786  | 8.72517796  |
| Bi | 11.36361564 | 10.11670420 | 5.08045132  |
| Bi | 13.01696114 | 5.89157327  | 8.28705569  |
| Bi | 10.96890509 | 6.21134681  | 5.47091224  |
| Bi | 8.65636412  | 4.26636898  | 8.12534576  |
| Bi | 6.89923964  | 7.28639482  | 11.89441435 |
| Bi | 5.74812525  | 5.71475710  | 7.90118823  |
| Bi | 4.95481654  | 10.07832495 | 8.53495169  |
| Bi | 7.00513581  | 8.34738115  | 4.98814623  |
